# Supplementary material for: A Genome-Wide Association Study of Highly Heritable Agronomic Traits in Durum Wheat
Source: Front Plant Sci. 2019 Jul 17;10:919. doi: 10.3389/fpls.2019.00919 (PMC6652809; doi:10.3389/fpls.2019.00919)
Supplement: TABLE S1 — Markers used in linkage analysis. [file Table_1.XLSX]

## Sheet: Sheet1
Table S1. Markers used in linkage analysis.
marker name	corresponding SNP	marker type	forward primer	backward primer	Tm(℃)	targeting sequence	alleles
dCAPS.IWA5782	IWA5782	CAPS(PstI)	AAAGGCCCGAGCTGCCATTGCTGC	ACTTACAGAGGAATACACATGAC	60	AAAGGCCCGAGCTGCCATTGCTGC[A/C]GCCACCCGTGCCTCTGCCGCCGCCCGTGCAGCAGCAGAGCTTGTTAACAAGGTTAAAGTTACAACTCAATGATCTATGCCTGCCGTGGAGGCGTGATTTGACAACTGTTCCCTTGCATAACAATTATGTCATGTGTATTCCTCTGTAAGT	A(150bp)	C(175bp)
dCAPS.IWA2023	IWA2023	dCAPS(MluI)	CATGTGTTCTGCGATACATCTACGC	CAGCAGCAGCAGCACTTTGGGAAC	60	CATGTGTTCTGCGATACATCTACTC[G/A]TCATTGCATAAGAAGAACAGAATCAGATATCGCAGGAACCACGGATGGGGAGACATGCCCACT CAAGGTAATCGAGAATATACAACCCTGAATAAGATCACCTGAAGTTCCCAAAGtgctgctgctgctg	G(130bp)	A(155bp)
dCAPS.IWA1713	IWA1713	dCAPS(BsmAI)	TGGGGTTTCTGATCTGTACAAATG	TTCCTCCGTCTGTGTATGTGTGGAGCTGTC	60	TGGGGTTTCTGATCTGTACAAATGATGATAGTGACAGATCCTGAGATCCCTTAGCATGGCATCTAAATATCCTTCGTAAAGATAAAATTTGCAGTCTGAACTTGCCTGGTCACAGATAAGGGATAGAGCACCCGTGCCGACCACGCATTCCAAAACGTGCCCCCACTCTTGG[A/G]GATAGCTCCACACATACACAGACGGAGGAA	G(203bp)	A(179bp)
dCAPS.IWA2816	IWA2816	dCAPS(SnaI)	GAATATTAGGTCTTACACATGTTCTTTGT	TATGGATTATACAAATACCAGTTGTG	60	GAATATTAGGTCTTACACATGTTCTTTTT[A/G]TACATATACGCCATGATACTTCGTATCCGAAGCTTACTTCAGCGGACCCTCGTGGTTTACGCTGGGATATCAGCTCAGGAGTATCGCCCAACGATTTACCAGATGCATGCCAACGTCCCCTTGTGGATAAGCTGCACAACTGGTATTTGTATAATCCATA	A(161bp)	G(190bp)
dCAPS.IWA3068	IWA3068	CAPS(SspI)	AAGTTCTATCTTCCACTTTCAGGG	CTTTGCAAAT GTACAACTTG AATGAA	60	AAGTTCTATCTTCCACTTTCAGGG[G/A]ATATTTGACGATTTCGGGTTCAAGGAGTAGCATCC GTCTGCTTTGGCAGGCAGGCGTCAGAATTACGCGTACCCAAGACGATTCGAACTAGAGAA AGCCCACGGAAACAAGTCTCCTGGTTCATTCAAGTTGTACATTTGCAAAG	A(148bp)	G(172bp)
dCAPS.IWA4124	IWA4124	dCAPS(AsuII)	CAAAGAAATCCCTTCTAGAAAGCTGG	ATCAGGCATCATTGATCGGGTTCGC	60	CAAAGAAATCCCTTCTAGAAAGCTGGAACTTGCCAAGGAGGTGCTTCAGTTTGGGAAGCAGGAGGACTTCTTTGTACACCGTCACTATTCCATCAGCATCGTC ACAATTTGAGCTTCCACTCAGGTCGAGTGTCTCTAGCTGATTCAGCTTCCCGATTTCCCT[T/C]GGAACCCGATCAATGATGCCTGAT	T(164)	C(188bp)
dCAPS.IWA4363	IWA4363	dCAPS(AsuII)	CGATCGTGTTGGTACACAATACGTATTC	CGAAGATGAAGTGGAGGACA	55	CGATCGTGTTGGTACACAATACGTATG[G/A]AAACAAAGTCACAAGAAAAAAGAATGCTACCCACAGCAGCCGATCTCTCCTTCCTCCCCGTCGATATCCATATCCACAGCGGGTGGTAATATGCTGTTGACATCCACGGAGGGGGGTGATATGCTGTCGACATCCACGGAGGGTGGTGATACGCTGTCGACATCCACGGAGGGTGCTGATGTCCTCCACTTCATCTTCG	A(200bp)	G(227bp)
dCAPS.IWA795	IWA795	dCAPS(ApalI)	CCCGTTGTCATGACGAAGTGTGC	CTGTTCTTAGTGCAACCTGATGC	60	CCCGTTGTCATGACGAAGTTTGC[A/C]CCGATCATGATGATCAATGTAATAGTGTAGCGATATACGGAGATATTTAGCTGTTGCCATACTCGTACGCATGAATTCAATGAtttttttCCACTGAAATGCCATGGGTTGGTTGCATTGCATCAGGTTGCACTAAGAACAG	A(143bp)	G(166bp)
