# Supplementary material for: A Genome-Wide Association Study of Highly Heritable Agronomic Traits in Durum Wheat
Source: Front Plant Sci. 2019 Jul 17;10:919. doi: 10.3389/fpls.2019.00919 (PMC6652809; doi:10.3389/fpls.2019.00919)
Supplement: TABLE S6 — Haplotypes present in the 4B.1 region among the durum wheat, emmer wheat and bread wheat materials. [file Table_6.XLSX]

## Sheet: Sheet1
Table S6. Haplotypes present in the 4B.1 region among the durum wheat, emmer wheat and bread wheat materials.
Lines	Species	Country	Region	Breeding status	Markers						Haplotype	Haplotype ID
					IWA4854	IWA76	IWA75	IWA8263	IWA453	IWA327
PI355505	domesticated_emmer	Ancient Palestine	NA	NA	BB	AA	AA	AA	AA	AA	BBAAAAAAAAAA	5
PI190926	domesticated_emmer	Belgium	NA	NA	BB	AA	AA	AA	AA	AA	BBAAAAAAAAAA	5
PI295065	domesticated_emmer	Bulgaria	NA	NA	BB	AA	AA	AA	AA	AA	BBAAAAAAAAAA	5
PI352358	domesticated_emmer	France	NA	NA	BB	AA	AA	AA	AA	AA	BBAAAAAAAAAA	5
PI352365	domesticated_emmer	Germany	NA	NA	BB	AA	AA	AA	AA	AA	BBAAAAAAAAAA	5
PI355461	domesticated_emmer	Germany	NA	NA	BB	AA	AA	AA	AA	AA	BBAAAAAAAAAA	5
PI355470	domesticated_emmer	Germany	NA	NA	BB	AA	AA	AA	AA	AA	BBAAAAAAAAAA	5
PI94680	domesticated_emmer	Germany	NA	NA	BB	AA	AA	AA	AA	AA	BBAAAAAAAAAA	5
PI286061	domesticated_emmer	Poland	NA	NA	BB	AA	AA	AA	AA	AA	BBAAAAAAAAAA	5
PI306536	domesticated_emmer	Romania	NA	NA	BB	AA	AA	AA	AA	AA	BBAAAAAAAAAA	5
PI191091	domesticated_emmer	Spain	NA	NA	BB	AA	AA	AA	AA	AA	BBAAAAAAAAAA	5
PI254193	domesticated_emmer	Spain	NA	NA	BB	AA	AA	AA	AA	AA	BBAAAAAAAAAA	5
PI276007	domesticated_emmer	Spain	NA	NA	BB	AA	AA	AA	AA	AA	BBAAAAAAAAAA	5
PI277670	domesticated_emmer	Spain	NA	NA	BB	AA	AA	AA	AA	AA	BBAAAAAAAAAA	5
PI277671	domesticated_emmer	Spain	NA	NA	BB	AA	AA	AA	AA	AA	BBAAAAAAAAAA	5
PI277677	domesticated_emmer	Spain	NA	NA	BB	AA	AA	AA	AA	AA	BBAAAAAAAAAA	5
PI355485	domesticated_emmer	Spain	NA	NA	BB	AA	AA	AA	AA	AA	BBAAAAAAAAAA	5
PI355486	domesticated_emmer	Spain	NA	NA	BB	AA	AA	AA	AA	AA	BBAAAAAAAAAA	5
PI355460	domesticated_emmer	Switzerland	NA	NA	BB	AA	AA	AA	AA	AA	BBAAAAAAAAAA	5
PI289603	domesticated_emmer	United Kingdom	NA	NA	BB	AA	AA	AA	AA	AA	BBAAAAAAAAAA	5
PI94621	domesticated_emmer	Armenia	NA	NA	BB	AA	AA	AA	BB	AA	BBAAAAAABBAA	7
PI94673	domesticated_emmer	Armenia	NA	NA	BB	AA	AA	AA	BB	AA	BBAAAAAABBAA	7
PI94627	domesticated_emmer	Asia Minor	NA	NA	BB	AA	AA	AA	BB	AA	BBAAAAAABBAA	7
PI374685	domesticated_emmer	Bosnia and Herzegovina	NA	NA	BB	AA	AA	AA	BB	AA	BBAAAAAABBAA	7
PI94654	domesticated_emmer	Bulgaria	NA	NA	BB	AA	AA	AA	BB	AA	BBAAAAAABBAA	7
CItr7779	domesticated_emmer	Ethiopia	NA	NA	BB	AA	AA	AA	BB	AA	BBAAAAAABBAA	7
PI94665	domesticated_emmer	Ethiopia	NA	NA	BB	AA	AA	AA	BB	AA	BBAAAAAABBAA	7
PI254188	domesticated_emmer	Former Soviet Union	NA	NA	BB	AA	AA	AA	BB	AA	BBAAAAAABBAA	7
PI377655	domesticated_emmer	Former Yugoslavia	NA	NA	BB	AA	AA	AA	BB	AA	BBAAAAAABBAA	7
PI377657	domesticated_emmer	Former Yugoslavia	NA	NA	BB	AA	AA	AA	BB	AA	BBAAAAAABBAA	7
PI377650	domesticated_emmer	Former Yugoslavia	NA	NA	BB	AA	AA	AA	BB	AA	BBAAAAAABBAA	7
PI377672	domesticated_emmer	Former Yugoslavia	NA	NA	BB	AA	AA	AA	BB	AA	BBAAAAAABBAA	7
PI355489	domesticated_emmer	France	NA	NA	BB	AA	AA	AA	BB	AA	BBAAAAAABBAA	7
PI74108	domesticated_emmer	Georgia	NA	NA	BB	AA	AA	AA	BB	AA	BBAAAAAABBAA	7
PI94674	domesticated_emmer	Georgia	NA	NA	BB	AA	AA	AA	BB	AA	BBAAAAAABBAA	7
PI94675	domesticated_emmer	Georgia	NA	NA	BB	AA	AA	AA	BB	AA	BBAAAAAABBAA	7
PI254189	domesticated_emmer	Georgia	NA	NA	BB	AA	AA	AA	BB	AA	BBAAAAAABBAA	7
PI349043	domesticated_emmer	Georgia	NA	NA	BB	AA	AA	AA	BB	AA	BBAAAAAABBAA	7
PI349046	domesticated_emmer	Georgia	NA	NA	BB	AA	AA	AA	BB	AA	BBAAAAAABBAA	7
PI94663	domesticated_emmer	Germany	NA	NA	BB	AA	AA	AA	BB	AA	BBAAAAAABBAA	7
CItr4013	domesticated_emmer	India	NA	NA	BB	AA	AA	AA	BB	AA	BBAAAAAABBAA	7
PI94625	domesticated_emmer	Iran	NA	NA	BB	AA	AA	AA	BB	AA	BBAAAAAABBAA	7
PI94635	domesticated_emmer	Iran	NA	NA	BB	AA	AA	AA	BB	AA	BBAAAAAABBAA	7
PI94638	domesticated_emmer	Iran	NA	NA	BB	AA	AA	AA	BB	AA	BBAAAAAABBAA	7
PI225332	domesticated_emmer	Iran	NA	NA	BB	AA	AA	AA	BB	AA	BBAAAAAABBAA	7
PI254165	domesticated_emmer	Iran	NA	NA	BB	AA	AA	AA	BB	AA	BBAAAAAABBAA	7
PI254167	domesticated_emmer	Iran	NA	NA	BB	AA	AA	AA	BB	AA	BBAAAAAABBAA	7
PI74106	domesticated_emmer	Iran	NA	NA	BB	AA	AA	AA	BB	AA	BBAAAAAABBAA	7
PI254163	domesticated_emmer	Iran	NA	NA	BB	AA	AA	AA	BB	AA	BBAAAAAABBAA	7
PI94648	domesticated_emmer	Italy	NA	NA	BB	AA	AA	AA	BB	AA	BBAAAAAABBAA	7
PI434992	domesticated_emmer	Montenegro	NA	NA	BB	AA	AA	AA	BB	AA	BBAAAAAABBAA	7
PI362697	domesticated_emmer	Montenegro	NA	NA	BB	AA	AA	AA	BB	AA	BBAAAAAABBAA	7
PI434996	domesticated_emmer	Montenegro	NA	NA	BB	AA	AA	AA	BB	AA	BBAAAAAABBAA	7
CItr7687	domesticated_emmer	Russian Federation	NA	NA	BB	AA	AA	AA	BB	AA	BBAAAAAABBAA	7
PI94616	domesticated_emmer	Russian Federation	NA	NA	BB	AA	AA	AA	BB	AA	BBAAAAAABBAA	7
PI94666	domesticated_emmer	Russian Federation	NA	NA	BB	AA	AA	AA	BB	AA	BBAAAAAABBAA	7
PI254190	domesticated_emmer	Russian Federation	NA	NA	BB	AA	AA	AA	BB	AA	BBAAAAAABBAA	7
PI41025	domesticated_emmer	Russian Federation	NA	NA	BB	AA	AA	AA	BB	AA	BBAAAAAABBAA	7
PI94617	domesticated_emmer	Russian Federation	NA	NA	BB	AA	AA	AA	BB	AA	BBAAAAAABBAA	7
PI94668	domesticated_emmer	Russian Federation	NA	NA	BB	AA	AA	AA	BB	AA	BBAAAAAABBAA	7
PI349045	domesticated_emmer	Russian Federation	NA	NA	BB	AA	AA	AA	BB	AA	BBAAAAAABBAA	7
PI221400	domesticated_emmer	Serbia	NA	NA	BB	AA	AA	AA	BB	AA	BBAAAAAABBAA	7
PI221401	domesticated_emmer	Serbia	NA	NA	BB	AA	AA	AA	BB	AA	BBAAAAAABBAA	7
PI350001	domesticated_emmer	Serbia	NA	NA	BB	AA	AA	AA	BB	AA	BBAAAAAABBAA	7
PI362438	domesticated_emmer	Serbia	NA	NA	BB	AA	AA	AA	BB	AA	BBAAAAAABBAA	7
PI362500	domesticated_emmer	Serbia	NA	NA	BB	AA	AA	AA	BB	AA	BBAAAAAABBAA	7
PI94626	domesticated_emmer	Turkey	NA	NA	BB	AA	AA	AA	BB	AA	BBAAAAAABBAA	7
PI355507	domesticated_emmer	Turkey	NA	NA	BB	AA	AA	AA	BB	AA	BBAAAAAABBAA	7
PI470737	domesticated_emmer	Turkey	NA	NA	BB	AA	AA	AA	BB	AA	BBAAAAAABBAA	7
PI94738	domesticated_emmer	Ukraine	NA	NA	BB	AA	AA	AA	BB	AA	BBAAAAAABBAA	7
CItr14085	domesticated_emmer	Unkown	NA	NA	BB	AA	AA	AA	BB	AA	BBAAAAAABBAA	7
CItr14086	domesticated_emmer	Unkown	NA	NA	BB	AA	AA	AA	BB	AA	BBAAAAAABBAA	7
CItr3686	domesticated_emmer	USA	NA	NA	BB	AA	AA	AA	BB	AA	BBAAAAAABBAA	7
PI352335	domesticated_emmer	USA	NA	NA	BB	AA	AA	AA	BB	AA	BBAAAAAABBAA	7
PI196905	domesticated_emmer	Ethiopia	NA	NA	BB	BB	BB	BB	AA	AA	BBBBBBBBAAAA	8
PI275997	domesticated_emmer	Spain	NA	NA	BB	BB	BB	BB	AA	AA	BBBBBBBBAAAA	8
PI355477	domesticated_emmer	Canada	NA	NA	BB	BB	BB	BB	BB	AA	BBBBBBBBBBAA	9
PI361833	domesticated_emmer	Denmark	NA	NA	BB	BB	BB	BB	BB	AA	BBBBBBBBBBAA	9
CItr14822	domesticated_emmer	Eritrea	NA	NA	BB	BB	BB	BB	BB	AA	BBBBBBBBBBAA	9
CItr14621	domesticated_emmer	Ethiopia	NA	NA	BB	BB	BB	BB	BB	AA	BBBBBBBBBBAA	9
CItr14637	domesticated_emmer	Ethiopia	NA	NA	BB	BB	BB	BB	BB	AA	BBBBBBBBBBAA	9
CItr14917	domesticated_emmer	Ethiopia	NA	NA	BB	BB	BB	BB	BB	AA	BBBBBBBBBBAA	9
PI94631	domesticated_emmer	Ethiopia	NA	NA	BB	BB	BB	BB	BB	AA	BBBBBBBBBBAA	9
PI193873	domesticated_emmer	Ethiopia	NA	NA	BB	BB	BB	BB	BB	AA	BBBBBBBBBBAA	9
PI193879	domesticated_emmer	Ethiopia	NA	NA	BB	BB	BB	BB	BB	AA	BBBBBBBBBBAA	9
PI193880	domesticated_emmer	Ethiopia	NA	NA	BB	BB	BB	BB	BB	AA	BBBBBBBBBBAA	9
PI193882	domesticated_emmer	Ethiopia	NA	NA	BB	BB	BB	BB	BB	AA	BBBBBBBBBBAA	9
PI193883	domesticated_emmer	Ethiopia	NA	NA	BB	BB	BB	BB	BB	AA	BBBBBBBBBBAA	9
PI194042	domesticated_emmer	Ethiopia	NA	NA	BB	BB	BB	BB	BB	AA	BBBBBBBBBBAA	9
PI194375	domesticated_emmer	Ethiopia	NA	NA	BB	BB	BB	BB	BB	AA	BBBBBBBBBBAA	9
PI197483	domesticated_emmer	Ethiopia	NA	NA	BB	BB	BB	BB	BB	AA	BBBBBBBBBBAA	9
PI197485	domesticated_emmer	Ethiopia	NA	NA	BB	BB	BB	BB	BB	AA	BBBBBBBBBBAA	9
PI244341	domesticated_emmer	Ethiopia	NA	NA	BB	BB	BB	BB	BB	AA	BBBBBBBBBBAA	9
PI273981	domesticated_emmer	Ethiopia	NA	NA	BB	BB	BB	BB	BB	AA	BBBBBBBBBBAA	9
PI298582	domesticated_emmer	Ethiopia	NA	NA	BB	BB	BB	BB	BB	AA	BBBBBBBBBBAA	9
PI352548	domesticated_emmer	Ethiopia	NA	NA	BB	BB	BB	BB	BB	AA	BBBBBBBBBBAA	9
PI384332	domesticated_emmer	Ethiopia	NA	NA	BB	BB	BB	BB	BB	AA	BBBBBBBBBBAA	9
PI480460	domesticated_emmer	Ethiopia	NA	NA	BB	BB	BB	BB	BB	AA	BBBBBBBBBBAA	9
CItr7962	domesticated_emmer	Ethiopia	NA	NA	BB	BB	BB	BB	BB	AA	BBBBBBBBBBAA	9
CItr14098	domesticated_emmer	Ethiopia	NA	NA	BB	BB	BB	BB	BB	AA	BBBBBBBBBBAA	9
CItr14639	domesticated_emmer	Ethiopia	NA	NA	BB	BB	BB	BB	BB	AA	BBBBBBBBBBAA	9
CItr14751	domesticated_emmer	Ethiopia	NA	NA	BB	BB	BB	BB	BB	AA	BBBBBBBBBBAA	9
CItr14834	domesticated_emmer	Ethiopia	NA	NA	BB	BB	BB	BB	BB	AA	BBBBBBBBBBAA	9
CItr14866	domesticated_emmer	Ethiopia	NA	NA	BB	BB	BB	BB	BB	AA	BBBBBBBBBBAA	9
PI58788	domesticated_emmer	Ethiopia	NA	NA	BB	BB	BB	BB	BB	AA	BBBBBBBBBBAA	9
PI60704	domesticated_emmer	Ethiopia	NA	NA	BB	BB	BB	BB	BB	AA	BBBBBBBBBBAA	9
PI94630	domesticated_emmer	Ethiopia	NA	NA	BB	BB	BB	BB	BB	AA	BBBBBBBBBBAA	9
PI168675	domesticated_emmer	Ethiopia	NA	NA	BB	BB	BB	BB	BB	AA	BBBBBBBBBBAA	9
PI193643	domesticated_emmer	Ethiopia	NA	NA	BB	BB	BB	BB	BB	AA	BBBBBBBBBBAA	9
PI193878	domesticated_emmer	Ethiopia	NA	NA	BB	BB	BB	BB	BB	AA	BBBBBBBBBBAA	9
PI195721	domesticated_emmer	Ethiopia	NA	NA	BB	BB	BB	BB	BB	AA	BBBBBBBBBBAA	9
PI196100	domesticated_emmer	Ethiopia	NA	NA	BB	BB	BB	BB	BB	AA	BBBBBBBBBBAA	9
PI197482	domesticated_emmer	Ethiopia	NA	NA	BB	BB	BB	BB	BB	AA	BBBBBBBBBBAA	9
PI197490	domesticated_emmer	Ethiopia	NA	NA	BB	BB	BB	BB	BB	AA	BBBBBBBBBBAA	9
PI226951	domesticated_emmer	Ethiopia	NA	NA	BB	BB	BB	BB	BB	AA	BBBBBBBBBBAA	9
PI254146	domesticated_emmer	Ethiopia	NA	NA	BB	BB	BB	BB	BB	AA	BBBBBBBBBBAA	9
PI273982	domesticated_emmer	Ethiopia	NA	NA	BB	BB	BB	BB	BB	AA	BBBBBBBBBBAA	9
PI297830	domesticated_emmer	Ethiopia	NA	NA	BB	BB	BB	BB	BB	AA	BBBBBBBBBBAA	9
PI298543	domesticated_emmer	Ethiopia	NA	NA	BB	BB	BB	BB	BB	AA	BBBBBBBBBBAA	9
PI298548	domesticated_emmer	Ethiopia	NA	NA	BB	BB	BB	BB	BB	AA	BBBBBBBBBBAA	9
PI384297	domesticated_emmer	Ethiopia	NA	NA	BB	BB	BB	BB	BB	AA	BBBBBBBBBBAA	9
PI384302	domesticated_emmer	Ethiopia	NA	NA	BB	BB	BB	BB	BB	AA	BBBBBBBBBBAA	9
PI384318	domesticated_emmer	Ethiopia	NA	NA	BB	BB	BB	BB	BB	AA	BBBBBBBBBBAA	9
PI384331	domesticated_emmer	Ethiopia	NA	NA	BB	BB	BB	BB	BB	AA	BBBBBBBBBBAA	9
PI479957	domesticated_emmer	Ethiopia	NA	NA	BB	BB	BB	BB	BB	AA	BBBBBBBBBBAA	9
PI479965	domesticated_emmer	Ethiopia	NA	NA	BB	BB	BB	BB	BB	AA	BBBBBBBBBBAA	9
PI480307	domesticated_emmer	Ethiopia	NA	NA	BB	BB	BB	BB	BB	AA	BBBBBBBBBBAA	9
PI480312	domesticated_emmer	Ethiopia	NA	NA	BB	BB	BB	BB	BB	AA	BBBBBBBBBBAA	9
PI480313	domesticated_emmer	Ethiopia	NA	NA	BB	BB	BB	BB	BB	AA	BBBBBBBBBBAA	9
PI480461	domesticated_emmer	Ethiopia	NA	NA	BB	BB	BB	BB	BB	AA	BBBBBBBBBBAA	9
PI480462	domesticated_emmer	Ethiopia	NA	NA	BB	BB	BB	BB	BB	AA	BBBBBBBBBBAA	9
PI355497	domesticated_emmer	Former Soviet Union	NA	NA	BB	BB	BB	BB	BB	AA	BBBBBBBBBBAA	9
PI94747	domesticated_emmer	Georgia	NA	NA	BB	BB	BB	BB	BB	AA	BBBBBBBBBBAA	9
PI113961	domesticated_emmer	Georgia	NA	NA	BB	BB	BB	BB	BB	AA	BBBBBBBBBBAA	9
PI355475	domesticated_emmer	Germany	NA	NA	BB	BB	BB	BB	BB	AA	BBBBBBBBBBAA	9
PI272533	domesticated_emmer	Hungary	NA	NA	BB	BB	BB	BB	BB	AA	BBBBBBBBBBAA	9
PI272527	domesticated_emmer	Hungary	NA	NA	BB	BB	BB	BB	BB	AA	BBBBBBBBBBAA	9
CItr12213	domesticated_emmer	India	NA	NA	BB	BB	BB	BB	BB	AA	BBBBBBBBBBAA	9
PI101971	domesticated_emmer	India	NA	NA	BB	BB	BB	BB	BB	AA	BBBBBBBBBBAA	9
PI164578	domesticated_emmer	India	NA	NA	BB	BB	BB	BB	BB	AA	BBBBBBBBBBAA	9
PI217637	domesticated_emmer	India	NA	NA	BB	BB	BB	BB	BB	AA	BBBBBBBBBBAA	9
PI217639	domesticated_emmer	India	NA	NA	BB	BB	BB	BB	BB	AA	BBBBBBBBBBAA	9
PI217640	domesticated_emmer	India	NA	NA	BB	BB	BB	BB	BB	AA	BBBBBBBBBBAA	9
PI310471	domesticated_emmer	India	NA	NA	BB	BB	BB	BB	BB	AA	BBBBBBBBBBAA	9
PI322232	domesticated_emmer	India	NA	NA	BB	BB	BB	BB	BB	AA	BBBBBBBBBBAA	9
PI324076	domesticated_emmer	India	NA	NA	BB	BB	BB	BB	BB	AA	BBBBBBBBBBAA	9
PI248991	domesticated_emmer	India	NA	NA	BB	BB	BB	BB	BB	AA	BBBBBBBBBBAA	9
PI94634	domesticated_emmer	Morocco	NA	NA	BB	BB	BB	BB	BB	AA	BBBBBBBBBBAA	9
PI532305	domesticated_emmer	Oman	NA	NA	BB	BB	BB	BB	BB	AA	BBBBBBBBBBAA	9
PI532304	domesticated_emmer	Oman	NA	NA	BB	BB	BB	BB	BB	AA	BBBBBBBBBBAA	9
PI133134	domesticated_emmer	Peru	NA	NA	BB	BB	BB	BB	BB	AA	BBBBBBBBBBAA	9
PI190920	domesticated_emmer	Portugal	NA	NA	BB	BB	BB	BB	BB	AA	BBBBBBBBBBAA	9
PI41024	domesticated_emmer	Russian Federation	NA	NA	BB	BB	BB	BB	BB	AA	BBBBBBBBBBAA	9
PI94676	domesticated_emmer	Russian Federation	NA	NA	BB	BB	BB	BB	BB	AA	BBBBBBBBBBAA	9
CItr7685	domesticated_emmer	Russian Federation	NA	NA	BB	BB	BB	BB	BB	AA	BBBBBBBBBBAA	9
CItr7686	domesticated_emmer	Russian Federation	NA	NA	BB	BB	BB	BB	BB	AA	BBBBBBBBBBAA	9
PI94664	domesticated_emmer	Saudi Arabia	NA	NA	BB	BB	BB	BB	BB	AA	BBBBBBBBBBAA	9
PI94656	domesticated_emmer	Serbia	NA	NA	BB	BB	BB	BB	BB	AA	BBBBBBBBBBAA	9
PI275996	domesticated_emmer	Spain	NA	NA	BB	BB	BB	BB	BB	AA	BBBBBBBBBBAA	9
PI275998	domesticated_emmer	Spain	NA	NA	BB	BB	BB	BB	BB	AA	BBBBBBBBBBAA	9
PI275999	domesticated_emmer	Spain	NA	NA	BB	BB	BB	BB	BB	AA	BBBBBBBBBBAA	9
PI276000	domesticated_emmer	Spain	NA	NA	BB	BB	BB	BB	BB	AA	BBBBBBBBBBAA	9
PI276005	domesticated_emmer	Spain	NA	NA	BB	BB	BB	BB	BB	AA	BBBBBBBBBBAA	9
PI276006	domesticated_emmer	Spain	NA	NA	BB	BB	BB	BB	BB	AA	BBBBBBBBBBAA	9
PI276012	domesticated_emmer	Spain	NA	NA	BB	BB	BB	BB	BB	AA	BBBBBBBBBBAA	9
PI276014	domesticated_emmer	Spain	NA	NA	BB	BB	BB	BB	BB	AA	BBBBBBBBBBAA	9
PI352337	domesticated_emmer	Spain	NA	NA	BB	BB	BB	BB	BB	AA	BBBBBBBBBBAA	9
PI352338	domesticated_emmer	Spain	NA	NA	BB	BB	BB	BB	BB	AA	BBBBBBBBBBAA	9
PI352341	domesticated_emmer	Spain	NA	NA	BB	BB	BB	BB	BB	AA	BBBBBBBBBBAA	9
PI352342	domesticated_emmer	Spain	NA	NA	BB	BB	BB	BB	BB	AA	BBBBBBBBBBAA	9
PI355483	domesticated_emmer	Spain	NA	NA	BB	BB	BB	BB	BB	AA	BBBBBBBBBBAA	9
PI154582	domesticated_emmer	Taiwan	NA	NA	BB	BB	BB	BB	BB	AA	BBBBBBBBBBAA	9
PI319869	domesticated_emmer	Turkey	NA	NA	BB	BB	BB	BB	BB	AA	BBBBBBBBBBAA	9
PI330544	domesticated_emmer	United Kingdom	NA	NA	BB	BB	BB	BB	BB	AA	BBBBBBBBBBAA	9
CItr14919	domesticated_emmer	Unkown	NA	NA	BB	BB	BB	BB	BB	AA	BBBBBBBBBBAA	9
CItr14971	domesticated_emmer	Unkown	NA	NA	BB	BB	BB	BB	BB	AA	BBBBBBBBBBAA	9
PI168673	domesticated_emmer	USA	NA	NA	BB	BB	BB	BB	BB	AA	BBBBBBBBBBAA	9
CItr14133	domesticated_emmer	USA	NA	NA	BB	BB	AA	AA	BB	AA	BBBBAAAABBAA	14
CITR14268	durum	Canada	America-1	Breeding line	AA	AA	AA	AA	AA	BB	AAAAAAAAAABB	1
CITR14954	durum	United States	America-1	Breeding line	AA	AA	AA	AA	AA	BB	AAAAAAAAAABB	1
PI519750	durum	Mexico	America-2	Breeding line	AA	AA	AA	AA	AA	BB	AAAAAAAAAABB	1
PI519753	durum	Mexico	America-2	Breeding line	AA	AA	AA	AA	AA	BB	AAAAAAAAAABB	1
PI520416	durum	Mexico	America-2	Breeding line	AA	AA	AA	AA	AA	BB	AAAAAAAAAABB	1
PI324928	durum	Argentina	America-3	Breeding line	AA	AA	AA	AA	AA	BB	AAAAAAAAAABB	1
PI519171	durum	Chile	America-3	Breeding line	AA	AA	AA	AA	AA	BB	AAAAAAAAAABB	1
PI519174	durum	Chile	America-3	Breeding line	AA	AA	AA	AA	AA	BB	AAAAAAAAAABB	1
PI519559	durum	Syria	Asia-1	Breeding line	AA	AA	AA	AA	AA	BB	AAAAAAAAAABB	1
PI520413	durum	Syria	Asia-1	Breeding line	AA	AA	AA	AA	AA	BB	AAAAAAAAAABB	1
PI209277	durum	Australia	Australia	Breeding line	AA	AA	AA	AA	AA	BB	AAAAAAAAAABB	1
PI316083	durum	Australia	Australia	Breeding line	AA	AA	AA	AA	AA	BB	AAAAAAAAAABB	1
PI316092	durum	Australia	Australia	Breeding line	AA	AA	AA	AA	AA	BB	AAAAAAAAAABB	1
PI223165	durum	Jordan	Asia-1	Cultivar	AA	AA	AA	AA	AA	BB	AAAAAAAAAABB	1
CITR15153	durum	Italy	Europe-3	Cultivar	AA	AA	AA	AA	AA	BB	AAAAAAAAAABB	1
CITR14965	durum	Unknown	Unknown	Cultivated line	AA	AA	AA	AA	AA	BB	AAAAAAAAAABB	1
CITR14809	durum	Eritrea	Africa-3	Landrace	AA	AA	AA	AA	AA	BB	AAAAAAAAAABB	1
CITR14813	durum	Eritrea	Africa-3	Landrace	AA	AA	AA	AA	AA	BB	AAAAAAAAAABB	1
CITR14438	durum	Ethiopia	Africa-3	Landrace	AA	AA	AA	AA	AA	BB	AAAAAAAAAABB	1
CITR14623	durum	Ethiopia	Africa-3	Landrace	AA	AA	AA	AA	AA	BB	AAAAAAAAAABB	1
CITR14978	durum	Cyprus	Asia-1	Landrace	AA	AA	AA	AA	AA	BB	AAAAAAAAAABB	1
PI210946	durum	Cyprus	Asia-1	Landrace	AA	AA	AA	AA	AA	BB	AAAAAAAAAABB	1
PI210954	durum	Cyprus	Asia-1	Landrace	AA	AA	AA	AA	AA	BB	AAAAAAAAAABB	1
PI223170	durum	Jordan	Asia-1	Landrace	AA	AA	AA	AA	AA	BB	AAAAAAAAAABB	1
CITR5083	durum	China	Asia-5	Landrace	AA	AA	AA	AA	AA	BB	AAAAAAAAAABB	1
PI204033	durum	Portugal	Europe-3	Landrace	AA	AA	AA	AA	AA	BB	AAAAAAAAAABB	1
PI519445	durum	United States	America-1	Breeding line	AA	AA	AA	AA	BB	AA	AAAAAAAABBAA	2
PI519777	durum	United States	America-1	Breeding line	AA	AA	AA	AA	BB	AA	AAAAAAAABBAA	2
PI520299	durum	United States	America-1	Breeding line	AA	AA	AA	AA	BB	AA	AAAAAAAABBAA	2
PI519887	durum	Mexico	America-2	Breeding line	AA	AA	AA	AA	BB	AA	AAAAAAAABBAA	2
PI324927	durum	Argentina	America-3	Breeding line	AA	AA	AA	AA	BB	AA	AAAAAAAABBAA	2
PI383915	durum	Argentina	America-3	Breeding line	AA	AA	AA	AA	BB	AA	AAAAAAAABBAA	2
PI519620	durum	Chile	America-3	Breeding line	AA	AA	AA	AA	BB	AA	AAAAAAAABBAA	2
PI519544	durum	Mexico	America-2	Cultivar	AA	AA	AA	AA	BB	AA	AAAAAAAABBAA	2
PI223168	durum	Jordan	Asia-1	Landrace	AA	AA	AA	AA	BB	AA	AAAAAAAABBAA	2
PI261823	durum	Saudi Arabia	Asia-4	Landrace	AA	AA	AA	AA	BB	AA	AAAAAAAABBAA	2
PI519732	durum	Mexico	America-2	Breeding line	AA	BB	BB	BB	BB	AA	AABBBBBBBBAA	3
PI519453	durum	Peru	America-3	Cultivar	AA	BB	BB	BB	BB	AA	AABBBBBBBBAA	3
PI532242	durum	Oman	Asia-4	Cultivated line	AA	BB	BB	BB	BB	AA	AABBBBBBBBAA	3
PI532288	durum	Oman	Asia-4	Cultivated line	AA	BB	BB	BB	BB	AA	AABBBBBBBBAA	3
PI532289	durum	Oman	Asia-4	Cultivated line	AA	BB	BB	BB	BB	AA	AABBBBBBBBAA	3
PI532292	durum	Oman	Asia-4	Cultivated line	AA	BB	BB	BB	BB	AA	AABBBBBBBBAA	3
PI462110	durum	Yemen	Asia-4	Cultivated line	AA	BB	BB	BB	BB	AA	AABBBBBBBBAA	3
CITR14699	durum	Ethiopia	Africa-3	Landrace	AA	BB	BB	BB	BB	AA	AABBBBBBBBAA	3
PI70732	durum	Iraq	Asia-1	Landrace	AA	BB	BB	BB	BB	AA	AABBBBBBBBAA	3
PI167718	durum	Turkey	Asia-1	Landrace	AA	BB	BB	BB	BB	AA	AABBBBBBBBAA	3
PI182113	durum	Pakistan	Asia-2	Cultivated line	AA	BB	BB	BB	BB	BB	AABBBBBBBBBB	4
PI532239	durum	Oman	Asia-5	Cultivated line	AA	BB	BB	BB	BB	BB	AABBBBBBBBBB	4
CITR15422	durum	Tunisia	Africa-1	Landrace	AA	BB	BB	BB	BB	BB	AABBBBBBBBBB	4
PI40939	durum	Pakistan	Asia-2	Landrace	AA	BB	BB	BB	BB	BB	AABBBBBBBBBB	4
PI462105	durum	Yemen	Asia-4	Cultivated line	BB	AA	AA	AA	AA	AA	BBAAAAAAAAAA	5
PI185233	durum	United Kingdom	Europe-1	Cultivated line	BB	AA	AA	AA	AA	AA	BBAAAAAAAAAA	5
PI191488	durum	Portugal	Europe-3	Cultivated line	BB	AA	AA	AA	AA	AA	BBAAAAAAAAAA	5
PI191963	durum	Portugal	Europe-3	Cultivated line	BB	AA	AA	AA	AA	AA	BBAAAAAAAAAA	5
PI290494	durum	Hungary	Europe-4	Cultivated line	BB	AA	AA	AA	AA	AA	BBAAAAAAAAAA	5
PI195693	durum	Ethiopia	Africa-3	Landrace	BB	AA	AA	AA	AA	AA	BBAAAAAAAAAA	5
PI196093	durum	Ethiopia	Africa-3	Landrace	BB	AA	AA	AA	AA	AA	BBAAAAAAAAAA	5
PI226576	durum	Ethiopia	Africa-3	Landrace	BB	AA	AA	AA	AA	AA	BBAAAAAAAAAA	5
PI297849	durum	Ethiopia	Africa-3	Landrace	BB	AA	AA	AA	AA	AA	BBAAAAAAAAAA	5
PI387263	durum	Ethiopia	Africa-3	Landrace	BB	AA	AA	AA	AA	AA	BBAAAAAAAAAA	5
PI387346	durum	Ethiopia	Africa-3	Landrace	BB	AA	AA	AA	AA	AA	BBAAAAAAAAAA	5
PI534304	durum	Ethiopia	Africa-3	Landrace	BB	AA	AA	AA	AA	AA	BBAAAAAAAAAA	5
PI185722	durum	Portugal	Europe-3	Landrace	BB	AA	AA	AA	AA	AA	BBAAAAAAAAAA	5
CITR14559	durum	Canada	America-1	Cultivar	BB	AA	AA	AA	AA	BB	BBAAAAAAAABB	6
PI634315	durum	Mexico	America-2	Cultivar	BB	AA	AA	AA	AA	BB	BBAAAAAAAABB	6
PI210912	durum	Pakistan	Asia-2	Cultivated line	BB	AA	AA	AA	AA	BB	BBAAAAAAAABB	6
CITR15159	durum	France	Europe-1	Cultivated line	BB	AA	AA	AA	AA	BB	BBAAAAAAAABB	6
PI264930	durum	Greece	Europe-3	Cultivated line	BB	AA	AA	AA	AA	BB	BBAAAAAAAABB	6
PI221409	durum	Serbia	Europe-4	Cultivated line	BB	AA	AA	AA	AA	BB	BBAAAAAAAABB	6
CITR14434	durum	Ethiopia	Africa-3	Landrace	BB	AA	AA	AA	AA	BB	BBAAAAAAAABB	6
PI388035	durum	Israel	Asia-1	Breeding line	BB	AA	AA	AA	BB	AA	BBAAAAAABBAA	7
PI295967	durum	Israel	Asia-1	Cultivar	BB	AA	AA	AA	BB	AA	BBAAAAAABBAA	7
PI223155	durum	Jordan	Asia-1	Cultivated line	BB	AA	AA	AA	BB	AA	BBAAAAAABBAA	7
PI68271	durum	Azerbaijan	Asia-3	Cultivated line	BB	AA	AA	AA	BB	AA	BBAAAAAABBAA	7
PI7464	durum	Spain	Europe-3	Landrace	BB	AA	AA	AA	BB	AA	BBAAAAAABBAA	7
CITR14810	durum	Eritrea	Africa-3	Landrace	BB	BB	BB	BB	AA	AA	BBBBBBBBAAAA	8
PI384244	durum	Ethiopia	Africa-3	Landrace	BB	BB	BB	BB	AA	AA	BBBBBBBBAAAA	8
PI195905	durum	Morocco	Africa-1	Breeding line	BB	BB	BB	BB	BB	AA	BBBBBBBBBBAA	9
CITR15911	durum	Tunisia	Africa-1	Breeding line	BB	BB	BB	BB	BB	AA	BBBBBBBBBBAA	9
PI306578	durum	Tunisia	Africa-1	Breeding line	BB	BB	BB	BB	BB	AA	BBBBBBBBBBAA	9
PI234860	durum	Ethiopia	Africa-3	Breeding line	BB	BB	BB	BB	BB	AA	BBBBBBBBBBAA	9
PI519642	durum	Kenya	Africa-3	Breeding line	BB	BB	BB	BB	BB	AA	BBBBBBBBBBAA	9
PI520044	durum	Kenya	Africa-3	Breeding line	BB	BB	BB	BB	BB	AA	BBBBBBBBBBAA	9
PI520092	durum	Kenya	Africa-3	Breeding line	BB	BB	BB	BB	BB	AA	BBBBBBBBBBAA	9
CITR13338	durum	Canada	America-1	Breeding line	BB	BB	BB	BB	BB	AA	BBBBBBBBBBAA	9
PI520027	durum	Canada	America-1	Breeding line	BB	BB	BB	BB	BB	AA	BBBBBBBBBBAA	9
CITR8882	durum	United States	America-1	Breeding line	BB	BB	BB	BB	BB	AA	BBBBBBBBBBAA	9
CITR11476	durum	United States	America-1	Breeding line	BB	BB	BB	BB	BB	AA	BBBBBBBBBBAA	9
CITR12032	durum	United States	America-1	Breeding line	BB	BB	BB	BB	BB	AA	BBBBBBBBBBAA	9
CITR15769	durum	United States	America-1	Breeding line	BB	BB	BB	BB	BB	AA	BBBBBBBBBBAA	9
CITR15814	durum	United States	America-1	Breeding line	BB	BB	BB	BB	BB	AA	BBBBBBBBBBAA	9
PI478304	durum	United States	America-1	Breeding line	BB	BB	BB	BB	BB	AA	BBBBBBBBBBAA	9
PI497927	durum	United States	America-1	Breeding line	BB	BB	BB	BB	BB	AA	BBBBBBBBBBAA	9
PI510694	durum	United States	America-1	Breeding line	BB	BB	BB	BB	BB	AA	BBBBBBBBBBAA	9
PI520518	durum	United States	America-1	Breeding line	BB	BB	BB	BB	BB	AA	BBBBBBBBBBAA	9
PI636501	durum	United States	America-1	Breeding line	BB	BB	BB	BB	BB	AA	BBBBBBBBBBAA	9
PI168913	durum	Mexico	America-2	Breeding line	BB	BB	BB	BB	BB	AA	BBBBBBBBBBAA	9
PI168916	durum	Mexico	America-2	Breeding line	BB	BB	BB	BB	BB	AA	BBBBBBBBBBAA	9
PI168922	durum	Mexico	America-2	Breeding line	BB	BB	BB	BB	BB	AA	BBBBBBBBBBAA	9
PI519556	durum	Mexico	America-2	Breeding line	BB	BB	BB	BB	BB	AA	BBBBBBBBBBAA	9
PI519557	durum	Mexico	America-2	Breeding line	BB	BB	BB	BB	BB	AA	BBBBBBBBBBAA	9
PI519566	durum	Mexico	America-2	Breeding line	BB	BB	BB	BB	BB	AA	BBBBBBBBBBAA	9
PI519567	durum	Mexico	America-2	Breeding line	BB	BB	BB	BB	BB	AA	BBBBBBBBBBAA	9
PI519862	durum	Mexico	America-2	Breeding line	BB	BB	BB	BB	BB	AA	BBBBBBBBBBAA	9
PI520023	durum	Mexico	America-2	Breeding line	BB	BB	BB	BB	BB	AA	BBBBBBBBBBAA	9
PI520362	durum	Mexico	America-2	Breeding line	BB	BB	BB	BB	BB	AA	BBBBBBBBBBAA	9
PI520392	durum	Mexico	America-2	Breeding line	BB	BB	BB	BB	BB	AA	BBBBBBBBBBAA	9
PI520406	durum	Mexico	America-2	Breeding line	BB	BB	BB	BB	BB	AA	BBBBBBBBBBAA	9
PI520407	durum	Mexico	America-2	Breeding line	BB	BB	BB	BB	BB	AA	BBBBBBBBBBAA	9
PI185300	durum	Argentina	America-3	Breeding line	BB	BB	BB	BB	BB	AA	BBBBBBBBBBAA	9
PI185301	durum	Argentina	America-3	Breeding line	BB	BB	BB	BB	BB	AA	BBBBBBBBBBAA	9
PI519759	durum	Brazil	America-3	Breeding line	BB	BB	BB	BB	BB	AA	BBBBBBBBBBAA	9
PI519170	durum	Chile	America-3	Breeding line	BB	BB	BB	BB	BB	AA	BBBBBBBBBBAA	9
PI519598	durum	Chile	America-3	Breeding line	BB	BB	BB	BB	BB	AA	BBBBBBBBBBAA	9
CITR14374	durum	Lebanon	Asia-1	Breeding line	BB	BB	BB	BB	BB	AA	BBBBBBBBBBAA	9
PI294587	durum	Lebanon	Asia-1	Breeding line	BB	BB	BB	BB	BB	AA	BBBBBBBBBBAA	9
PI519619	durum	Syria	Asia-1	Breeding line	BB	BB	BB	BB	BB	AA	BBBBBBBBBBAA	9
PI519639	durum	Syria	Asia-1	Breeding line	BB	BB	BB	BB	BB	AA	BBBBBBBBBBAA	9
PI209274	durum	Australia	Australia	Breeding line	BB	BB	BB	BB	BB	AA	BBBBBBBBBBAA	9
PI306646	durum	France	Europe-1	Breeding line	BB	BB	BB	BB	BB	AA	BBBBBBBBBBAA	9
PI306657	durum	France	Europe-1	Breeding line	BB	BB	BB	BB	BB	AA	BBBBBBBBBBAA	9
PI306658	durum	France	Europe-1	Breeding line	BB	BB	BB	BB	BB	AA	BBBBBBBBBBAA	9
PI383416	durum	France	Europe-1	Breeding line	BB	BB	BB	BB	BB	AA	BBBBBBBBBBAA	9
PI264434	durum	Greece	Europe-3	Breeding line	BB	BB	BB	BB	BB	AA	BBBBBBBBBBAA	9
PI264440	durum	Greece	Europe-3	Breeding line	BB	BB	BB	BB	BB	AA	BBBBBBBBBBAA	9
PI306570	durum	Italy	Europe-3	Breeding line	BB	BB	BB	BB	BB	AA	BBBBBBBBBBAA	9
PI367224	durum	Italy	Europe-3	Breeding line	BB	BB	BB	BB	BB	AA	BBBBBBBBBBAA	9
PI367227	durum	Italy	Europe-3	Breeding line	BB	BB	BB	BB	BB	AA	BBBBBBBBBBAA	9
PI191078	durum	Spain	Europe-3	Breeding line	BB	BB	BB	BB	BB	AA	BBBBBBBBBBAA	9
PI272476	durum	Hungary	Europe-4	Breeding line	BB	BB	BB	BB	BB	AA	BBBBBBBBBBAA	9
PI272545	durum	Hungary	Europe-4	Breeding line	BB	BB	BB	BB	BB	AA	BBBBBBBBBBAA	9
PI520165	durum	Algeria	Africa-1	Cultivar	BB	BB	BB	BB	BB	AA	BBBBBBBBBBAA	9
PI174646	durum	Tunisia	Africa-1	Cultivar	BB	BB	BB	BB	BB	AA	BBBBBBBBBBAA	9
PI278383	durum	Tunisia	Africa-1	Cultivar	BB	BB	BB	BB	BB	AA	BBBBBBBBBBAA	9
PI192454	durum	Kenya	Africa-3	Cultivar	BB	BB	BB	BB	BB	AA	BBBBBBBBBBAA	9
PI38624	durum	South Africa	Africa-4	Cultivar	BB	BB	BB	BB	BB	AA	BBBBBBBBBBAA	9
CITR17337	durum	Canada	America-1	Cultivar	BB	BB	BB	BB	BB	AA	BBBBBBBBBBAA	9
CITR17341	durum	Canada	America-1	Cultivar	BB	BB	BB	BB	BB	AA	BBBBBBBBBBAA	9
CITR17757	durum	Canada	America-1	Cultivar	BB	BB	BB	BB	BB	AA	BBBBBBBBBBAA	9
PI537310	durum	Canada	America-1	Cultivar	BB	BB	BB	BB	BB	AA	BBBBBBBBBBAA	9
CITR13246	durum	United States	America-1	Cultivar	BB	BB	BB	BB	BB	AA	BBBBBBBBBBAA	9
PI290486	durum	United States	America-1	Cultivar	BB	BB	BB	BB	BB	AA	BBBBBBBBBBAA	9
PI290490	durum	United States	America-1	Cultivar	BB	BB	BB	BB	BB	AA	BBBBBBBBBBAA	9
PI321699	durum	United States	America-1	Cultivar	BB	BB	BB	BB	BB	AA	BBBBBBBBBBAA	9
PI320097	durum	Mexico	America-2	Cultivar	BB	BB	BB	BB	BB	AA	BBBBBBBBBBAA	9
PI383914	durum	Argentina	America-3	Cultivar	BB	BB	BB	BB	BB	AA	BBBBBBBBBBAA	9
PI383916	durum	Argentina	America-3	Cultivar	BB	BB	BB	BB	BB	AA	BBBBBBBBBBAA	9
PI324517	durum	Chile	America-3	Cultivar	BB	BB	BB	BB	BB	AA	BBBBBBBBBBAA	9
PI324519	durum	Chile	America-3	Cultivar	BB	BB	BB	BB	BB	AA	BBBBBBBBBBAA	9
PI286539	durum	Ecuador	America-3	Cultivar	BB	BB	BB	BB	BB	AA	BBBBBBBBBBAA	9
PI477911	durum	Peru	America-3	Cultivar	BB	BB	BB	BB	BB	AA	BBBBBBBBBBAA	9
PI384038	durum	Israel	Asia-1	Cultivar	BB	BB	BB	BB	BB	AA	BBBBBBBBBBAA	9
PI384044	durum	Israel	Asia-1	Cultivar	BB	BB	BB	BB	BB	AA	BBBBBBBBBBAA	9
PI384045	durum	Israel	Asia-1	Cultivar	BB	BB	BB	BB	BB	AA	BBBBBBBBBBAA	9
PI223152	durum	Jordan	Asia-1	Cultivar	BB	BB	BB	BB	BB	AA	BBBBBBBBBBAA	9
PI234381	durum	Jordan	Asia-1	Cultivar	BB	BB	BB	BB	BB	AA	BBBBBBBBBBAA	9
PI234384	durum	Jordan	Asia-1	Cultivar	BB	BB	BB	BB	BB	AA	BBBBBBBBBBAA	9
PI238388	durum	Jordan	Asia-1	Cultivar	BB	BB	BB	BB	BB	AA	BBBBBBBBBBAA	9
PI371820	durum	Jordan	Asia-1	Cultivar	BB	BB	BB	BB	BB	AA	BBBBBBBBBBAA	9
PI371824	durum	Jordan	Asia-1	Cultivar	BB	BB	BB	BB	BB	AA	BBBBBBBBBBAA	9
PI294588	durum	Lebanon	Asia-1	Cultivar	BB	BB	BB	BB	BB	AA	BBBBBBBBBBAA	9
PI519832	durum	Lebanon	Asia-1	Cultivar	BB	BB	BB	BB	BB	AA	BBBBBBBBBBAA	9
PI260061	durum	Kazakhstan	Asia-2	Cultivar	BB	BB	BB	BB	BB	AA	BBBBBBBBBBAA	9
PI81792	durum	Japan	Asia-5	Cultivar	BB	BB	BB	BB	BB	AA	BBBBBBBBBBAA	9
PI324480	durum	India	Asia-6	Cultivar	BB	BB	BB	BB	BB	AA	BBBBBBBBBBAA	9
PI325850	durum	India	Asia-6	Cultivar	BB	BB	BB	BB	BB	AA	BBBBBBBBBBAA	9
CITR5122	durum	Australia	Australia	Cultivar	BB	BB	BB	BB	BB	AA	BBBBBBBBBBAA	9
PI174645	durum	Australia	Australia	Cultivar	BB	BB	BB	BB	BB	AA	BBBBBBBBBBAA	9
PI316096	durum	Australia	Australia	Cultivar	BB	BB	BB	BB	BB	AA	BBBBBBBBBBAA	9
PI286076	durum	Poland	Europe-2	Cultivar	BB	BB	BB	BB	BB	AA	BBBBBBBBBBAA	9
PI251918	durum	Russian Federation	Europe-2	Cultivar	BB	BB	BB	BB	BB	AA	BBBBBBBBBBAA	9
PI274672	durum	Russian Federation	Europe-2	Cultivar	BB	BB	BB	BB	BB	AA	BBBBBBBBBBAA	9
PI338529	durum	Greece	Europe-3	Cultivar	BB	BB	BB	BB	BB	AA	BBBBBBBBBBAA	9
PI157957	durum	Italy	Europe-3	Cultivar	BB	BB	BB	BB	BB	AA	BBBBBBBBBBAA	9
PI191448	durum	Italy	Europe-3	Cultivar	BB	BB	BB	BB	BB	AA	BBBBBBBBBBAA	9
PI264948	durum	Italy	Europe-3	Cultivar	BB	BB	BB	BB	BB	AA	BBBBBBBBBBAA	9
PI367240	durum	Italy	Europe-3	Cultivar	BB	BB	BB	BB	BB	AA	BBBBBBBBBBAA	9
PI519811	durum	Italy	Europe-3	Cultivar	BB	BB	BB	BB	BB	AA	BBBBBBBBBBAA	9
PI390208	durum	Bulgaria	Europe-4	Cultivar	BB	BB	BB	BB	BB	AA	BBBBBBBBBBAA	9
PI138971	durum	Algeria	Africa-1	Cultivated line	BB	BB	BB	BB	BB	AA	BBBBBBBBBBAA	9
PI192109	durum	Angola	Africa-1	Cultivated line	BB	BB	BB	BB	BB	AA	BBBBBBBBBBAA	9
PI532140	durum	Egypt	Africa-1	Cultivated line	BB	BB	BB	BB	BB	AA	BBBBBBBBBBAA	9
PI192334	durum	Morocco	Africa-1	Cultivated line	BB	BB	BB	BB	BB	AA	BBBBBBBBBBAA	9
PI192640	durum	Morocco	Africa-1	Cultivated line	BB	BB	BB	BB	BB	AA	BBBBBBBBBBAA	9
PI192657	durum	Morocco	Africa-1	Cultivated line	BB	BB	BB	BB	BB	AA	BBBBBBBBBBAA	9
PI192665	durum	Morocco	Africa-1	Cultivated line	BB	BB	BB	BB	BB	AA	BBBBBBBBBBAA	9
PI304919	durum	Morocco	Africa-1	Cultivated line	BB	BB	BB	BB	BB	AA	BBBBBBBBBBAA	9
PI525334	durum	Morocco	Africa-1	Cultivated line	BB	BB	BB	BB	BB	AA	BBBBBBBBBBAA	9
PI525341	durum	Morocco	Africa-1	Cultivated line	BB	BB	BB	BB	BB	AA	BBBBBBBBBBAA	9
PI525371	durum	Morocco	Africa-1	Cultivated line	BB	BB	BB	BB	BB	AA	BBBBBBBBBBAA	9
PI525395	durum	Morocco	Africa-1	Cultivated line	BB	BB	BB	BB	BB	AA	BBBBBBBBBBAA	9
PI525428	durum	Morocco	Africa-1	Cultivated line	BB	BB	BB	BB	BB	AA	BBBBBBBBBBAA	9
PI525438	durum	Morocco	Africa-1	Cultivated line	BB	BB	BB	BB	BB	AA	BBBBBBBBBBAA	9
PI41050	durum	Tunisia	Africa-1	Cultivated line	BB	BB	BB	BB	BB	AA	BBBBBBBBBBAA	9
PI51210	durum	Tunisia	Africa-1	Cultivated line	BB	BB	BB	BB	BB	AA	BBBBBBBBBBAA	9
PI384391	durum	Nigeria	Africa-2	Cultivated line	BB	BB	BB	BB	BB	AA	BBBBBBBBBBAA	9
PI384392	durum	Nigeria	Africa-2	Cultivated line	BB	BB	BB	BB	BB	AA	BBBBBBBBBBAA	9
PI384393	durum	Nigeria	Africa-2	Cultivated line	BB	BB	BB	BB	BB	AA	BBBBBBBBBBAA	9
PI384394	durum	Nigeria	Africa-2	Cultivated line	BB	BB	BB	BB	BB	AA	BBBBBBBBBBAA	9
PI384401	durum	Nigeria	Africa-2	Cultivated line	BB	BB	BB	BB	BB	AA	BBBBBBBBBBAA	9
PI94758	durum	Ethiopia	Africa-3	Cultivated line	BB	BB	BB	BB	BB	AA	BBBBBBBBBBAA	9
PI50929	durum	Tanzania	Africa-3	Cultivated line	BB	BB	BB	BB	BB	AA	BBBBBBBBBBAA	9
PI45441	durum	South Africa	Africa-4	Cultivated line	BB	BB	BB	BB	BB	AA	BBBBBBBBBBAA	9
PI45442	durum	South Africa	Africa-4	Cultivated line	BB	BB	BB	BB	BB	AA	BBBBBBBBBBAA	9
PI412984	durum	South Africa	Africa-4	Cultivated line	BB	BB	BB	BB	BB	AA	BBBBBBBBBBAA	9
PI89642	durum	Honduras	America-2	Cultivated line	BB	BB	BB	BB	BB	AA	BBBBBBBBBBAA	9
PI282911	durum	Argentina	America-3	Cultivated line	BB	BB	BB	BB	BB	AA	BBBBBBBBBBAA	9
PI478427	durum	Bolivia	America-3	Cultivated line	BB	BB	BB	BB	BB	AA	BBBBBBBBBBAA	9
PI191645	durum	Brazil	America-3	Cultivated line	BB	BB	BB	BB	BB	AA	BBBBBBBBBBAA	9
PI230366	durum	Chile	America-3	Cultivated line	BB	BB	BB	BB	BB	AA	BBBBBBBBBBAA	9
PI230367	durum	Chile	America-3	Cultivated line	BB	BB	BB	BB	BB	AA	BBBBBBBBBBAA	9
PI231305	durum	Chile	America-3	Cultivated line	BB	BB	BB	BB	BB	AA	BBBBBBBBBBAA	9
PI324518	durum	Chile	America-3	Cultivated line	BB	BB	BB	BB	BB	AA	BBBBBBBBBBAA	9
PI165476	durum	Uruguay	America-3	Cultivated line	BB	BB	BB	BB	BB	AA	BBBBBBBBBBAA	9
CITR12818	durum	Israel	Asia-1	Cultivated line	BB	BB	BB	BB	BB	AA	BBBBBBBBBBAA	9
PI249822	durum	Israel	Asia-1	Cultivated line	BB	BB	BB	BB	BB	AA	BBBBBBBBBBAA	9
PI283151	durum	Jordan	Asia-1	Cultivated line	BB	BB	BB	BB	BB	AA	BBBBBBBBBBAA	9
PI182668	durum	Lebanon	Asia-1	Cultivated line	BB	BB	BB	BB	BB	AA	BBBBBBBBBBAA	9
PI182676	durum	Lebanon	Asia-1	Cultivated line	BB	BB	BB	BB	BB	AA	BBBBBBBBBBAA	9
PI342646	durum	Lebanon	Asia-1	Cultivated line	BB	BB	BB	BB	BB	AA	BBBBBBBBBBAA	9
PI342647	durum	Lebanon	Asia-1	Cultivated line	BB	BB	BB	BB	BB	AA	BBBBBBBBBBAA	9
PI266978	durum	Turkey	Asia-1	Cultivated line	BB	BB	BB	BB	BB	AA	BBBBBBBBBBAA	9
PI68260	durum	Azerbaijan	Asia-3	Cultivated line	BB	BB	BB	BB	BB	AA	BBBBBBBBBBAA	9
PI68266	durum	Azerbaijan	Asia-3	Cultivated line	BB	BB	BB	BB	BB	AA	BBBBBBBBBBAA	9
PI68275	durum	Azerbaijan	Asia-3	Cultivated line	BB	BB	BB	BB	BB	AA	BBBBBBBBBBAA	9
PI499974	durum	Azerbaijan	Asia-3	Cultivated line	BB	BB	BB	BB	BB	AA	BBBBBBBBBBAA	9
PI152567	durum	Yemen	Asia-4	Cultivated line	BB	BB	BB	BB	BB	AA	BBBBBBBBBBAA	9
CITR11496	durum	China	Asia-5	Cultivated line	BB	BB	BB	BB	BB	AA	BBBBBBBBBBAA	9
PI447421	durum	China	Asia-5	Cultivated line	BB	BB	BB	BB	BB	AA	BBBBBBBBBBAA	9
PI283854	durum	India	Asia-6	Cultivated line	BB	BB	BB	BB	BB	AA	BBBBBBBBBBAA	9
PI283855	durum	India	Asia-6	Cultivated line	BB	BB	BB	BB	BB	AA	BBBBBBBBBBAA	9
PI283856	durum	India	Asia-6	Cultivated line	BB	BB	BB	BB	BB	AA	BBBBBBBBBBAA	9
PI324850	durum	India	Asia-6	Cultivated line	BB	BB	BB	BB	BB	AA	BBBBBBBBBBAA	9
PI174625	durum	France	Europe-1	Cultivated line	BB	BB	BB	BB	BB	AA	BBBBBBBBBBAA	9
PI174697	durum	France	Europe-1	Cultivated line	BB	BB	BB	BB	BB	AA	BBBBBBBBBBAA	9
PI191571	durum	France	Europe-1	Cultivated line	BB	BB	BB	BB	BB	AA	BBBBBBBBBBAA	9
PI289604	durum	United Kingdom	Europe-1	Cultivated line	BB	BB	BB	BB	BB	AA	BBBBBBBBBBAA	9
PI330529	durum	United Kingdom	Europe-1	Cultivated line	BB	BB	BB	BB	BB	AA	BBBBBBBBBBAA	9
PI330546	durum	United Kingdom	Europe-1	Cultivated line	BB	BB	BB	BB	BB	AA	BBBBBBBBBBAA	9
PI330547	durum	United Kingdom	Europe-1	Cultivated line	BB	BB	BB	BB	BB	AA	BBBBBBBBBBAA	9
PI278443	durum	Former Soviet Union	Europe-2	Cultivated line	BB	BB	BB	BB	BB	AA	BBBBBBBBBBAA	9
PI274670	durum	Poland	Europe-2	Cultivated line	BB	BB	BB	BB	BB	AA	BBBBBBBBBBAA	9
PI274671	durum	Poland	Europe-2	Cultivated line	BB	BB	BB	BB	BB	AA	BBBBBBBBBBAA	9
PI274676	durum	Poland	Europe-2	Cultivated line	BB	BB	BB	BB	BB	AA	BBBBBBBBBBAA	9
PI274678	durum	Poland	Europe-2	Cultivated line	BB	BB	BB	BB	BB	AA	BBBBBBBBBBAA	9
PI274681	durum	Poland	Europe-2	Cultivated line	BB	BB	BB	BB	BB	AA	BBBBBBBBBBAA	9
PI274682	durum	Poland	Europe-2	Cultivated line	BB	BB	BB	BB	BB	AA	BBBBBBBBBBAA	9
PI286063	durum	Poland	Europe-2	Cultivated line	BB	BB	BB	BB	BB	AA	BBBBBBBBBBAA	9
PI191356	durum	Russian Federation	Europe-2	Cultivated line	BB	BB	BB	BB	BB	AA	BBBBBBBBBBAA	9
PI192711	durum	Sweden	Europe-2	Cultivated line	BB	BB	BB	BB	BB	AA	BBBBBBBBBBAA	9
PI57555	durum	Ukraine	Europe-2	Cultivated line	BB	BB	BB	BB	BB	AA	BBBBBBBBBBAA	9
PI57556	durum	Ukraine	Europe-2	Cultivated line	BB	BB	BB	BB	BB	AA	BBBBBBBBBBAA	9
PI57558	durum	Ukraine	Europe-2	Cultivated line	BB	BB	BB	BB	BB	AA	BBBBBBBBBBAA	9
PI57560	durum	Ukraine	Europe-2	Cultivated line	BB	BB	BB	BB	BB	AA	BBBBBBBBBBAA	9
PI57562	durum	Ukraine	Europe-2	Cultivated line	BB	BB	BB	BB	BB	AA	BBBBBBBBBBAA	9
PI57593	durum	Ukraine	Europe-2	Cultivated line	BB	BB	BB	BB	BB	AA	BBBBBBBBBBAA	9
PI57595	durum	Ukraine	Europe-2	Cultivated line	BB	BB	BB	BB	BB	AA	BBBBBBBBBBAA	9
PI57599	durum	Ukraine	Europe-2	Cultivated line	BB	BB	BB	BB	BB	AA	BBBBBBBBBBAA	9
PI57602	durum	Ukraine	Europe-2	Cultivated line	BB	BB	BB	BB	BB	AA	BBBBBBBBBBAA	9
PI264938	durum	Greece	Europe-3	Cultivated line	BB	BB	BB	BB	BB	AA	BBBBBBBBBBAA	9
PI264992	durum	Greece	Europe-3	Cultivated line	BB	BB	BB	BB	BB	AA	BBBBBBBBBBAA	9
PI157953	durum	Italy	Europe-3	Cultivated line	BB	BB	BB	BB	BB	AA	BBBBBBBBBBAA	9
PI264947	durum	Italy	Europe-3	Cultivated line	BB	BB	BB	BB	BB	AA	BBBBBBBBBBAA	9
PI278380	durum	Malta	Europe-3	Cultivated line	BB	BB	BB	BB	BB	AA	BBBBBBBBBBAA	9
PI184540	durum	Portugal	Europe-3	Cultivated line	BB	BB	BB	BB	BB	AA	BBBBBBBBBBAA	9
PI190937	durum	Portugal	Europe-3	Cultivated line	BB	BB	BB	BB	BB	AA	BBBBBBBBBBAA	9
PI190977	durum	Portugal	Europe-3	Cultivated line	BB	BB	BB	BB	BB	AA	BBBBBBBBBBAA	9
PI191624	durum	Portugal	Europe-3	Cultivated line	BB	BB	BB	BB	BB	AA	BBBBBBBBBBAA	9
PI191816	durum	Portugal	Europe-3	Cultivated line	BB	BB	BB	BB	BB	AA	BBBBBBBBBBAA	9
PI278502	durum	Spain	Europe-3	Cultivated line	BB	BB	BB	BB	BB	AA	BBBBBBBBBBAA	9
PI278503	durum	Spain	Europe-3	Cultivated line	BB	BB	BB	BB	BB	AA	BBBBBBBBBBAA	9
PI272553	durum	Hungary	Europe-4	Cultivated line	BB	BB	BB	BB	BB	AA	BBBBBBBBBBAA	9
PI290473	durum	Hungary	Europe-4	Cultivated line	BB	BB	BB	BB	BB	AA	BBBBBBBBBBAA	9
PI290531	durum	Hungary	Europe-4	Cultivated line	BB	BB	BB	BB	BB	AA	BBBBBBBBBBAA	9
PI306530	durum	Romania	Europe-4	Cultivated line	BB	BB	BB	BB	BB	AA	BBBBBBBBBBAA	9
PI254011	durum	Europe	Europe-unknown	Cultivated line	BB	BB	BB	BB	BB	AA	BBBBBBBBBBAA	9
PI254012	durum	Europe	Europe-unknown	Cultivated line	BB	BB	BB	BB	BB	AA	BBBBBBBBBBAA	9
PI254013	durum	Europe	Europe-unknown	Cultivated line	BB	BB	BB	BB	BB	AA	BBBBBBBBBBAA	9
PI254014	durum	Europe	Europe-unknown	Cultivated line	BB	BB	BB	BB	BB	AA	BBBBBBBBBBAA	9
PI254015	durum	Europe	Europe-unknown	Cultivated line	BB	BB	BB	BB	BB	AA	BBBBBBBBBBAA	9
CITR14080	durum	Unknown	Unknown	Cultivated line	BB	BB	BB	BB	BB	AA	BBBBBBBBBBAA	9
CITR14091	durum	Unknown	Unknown	Cultivated line	BB	BB	BB	BB	BB	AA	BBBBBBBBBBAA	9
CITR14093	durum	Unknown	Unknown	Cultivated line	BB	BB	BB	BB	BB	AA	BBBBBBBBBBAA	9
CITR14094	durum	Unknown	Unknown	Cultivated line	BB	BB	BB	BB	BB	AA	BBBBBBBBBBAA	9
PI470826	durum	Algeria	Africa-1	Landrace	BB	BB	BB	BB	BB	AA	BBBBBBBBBBAA	9
PI470833	durum	Algeria	Africa-1	Landrace	BB	BB	BB	BB	BB	AA	BBBBBBBBBBAA	9
PI470834	durum	Algeria	Africa-1	Landrace	BB	BB	BB	BB	BB	AA	BBBBBBBBBBAA	9
PI470843	durum	Algeria	Africa-1	Landrace	BB	BB	BB	BB	BB	AA	BBBBBBBBBBAA	9
PI470868	durum	Algeria	Africa-1	Landrace	BB	BB	BB	BB	BB	AA	BBBBBBBBBBAA	9
PI470875	durum	Algeria	Africa-1	Landrace	BB	BB	BB	BB	BB	AA	BBBBBBBBBBAA	9
PI470893	durum	Algeria	Africa-1	Landrace	BB	BB	BB	BB	BB	AA	BBBBBBBBBBAA	9
PI470903	durum	Algeria	Africa-1	Landrace	BB	BB	BB	BB	BB	AA	BBBBBBBBBBAA	9
PI470904	durum	Algeria	Africa-1	Landrace	BB	BB	BB	BB	BB	AA	BBBBBBBBBBAA	9
PI534471	durum	Algeria	Africa-1	Landrace	BB	BB	BB	BB	BB	AA	BBBBBBBBBBAA	9
PI113395	durum	Egypt	Africa-1	Landrace	BB	BB	BB	BB	BB	AA	BBBBBBBBBBAA	9
PI113397	durum	Egypt	Africa-1	Landrace	BB	BB	BB	BB	BB	AA	BBBBBBBBBBAA	9
PI113398	durum	Egypt	Africa-1	Landrace	BB	BB	BB	BB	BB	AA	BBBBBBBBBBAA	9
PI534501	durum	Egypt	Africa-1	Landrace	BB	BB	BB	BB	BB	AA	BBBBBBBBBBAA	9
PI54432	durum	Libya	Africa-1	Landrace	BB	BB	BB	BB	BB	AA	BBBBBBBBBBAA	9
PI153727	durum	North Africa	Africa-1	Landrace	BB	BB	BB	BB	BB	AA	BBBBBBBBBBAA	9
CITR6874	durum	Tunisia	Africa-1	Landrace	BB	BB	BB	BB	BB	AA	BBBBBBBBBBAA	9
CITR6876	durum	Tunisia	Africa-1	Landrace	BB	BB	BB	BB	BB	AA	BBBBBBBBBBAA	9
CITR15500	durum	Tunisia	Africa-1	Landrace	BB	BB	BB	BB	BB	AA	BBBBBBBBBBAA	9
CITR15513	durum	Tunisia	Africa-1	Landrace	BB	BB	BB	BB	BB	AA	BBBBBBBBBBAA	9
PI55543	durum	Tunisia	Africa-1	Landrace	BB	BB	BB	BB	BB	AA	BBBBBBBBBBAA	9
PI534343	durum	Tunisia	Africa-1	Landrace	BB	BB	BB	BB	BB	AA	BBBBBBBBBBAA	9
PI534351	durum	Tunisia	Africa-1	Landrace	BB	BB	BB	BB	BB	AA	BBBBBBBBBBAA	9
PI534367	durum	Tunisia	Africa-1	Landrace	BB	BB	BB	BB	BB	AA	BBBBBBBBBBAA	9
PI534370	durum	Tunisia	Africa-1	Landrace	BB	BB	BB	BB	BB	AA	BBBBBBBBBBAA	9
CITR14814	durum	Eritrea	Africa-3	Landrace	BB	BB	BB	BB	BB	AA	BBBBBBBBBBAA	9
CITR14816	durum	Eritrea	Africa-3	Landrace	BB	BB	BB	BB	BB	AA	BBBBBBBBBBAA	9
CITR14099	durum	Ethiopia	Africa-3	Landrace	BB	BB	BB	BB	BB	AA	BBBBBBBBBBAA	9
CITR14618	durum	Ethiopia	Africa-3	Landrace	BB	BB	BB	BB	BB	AA	BBBBBBBBBBAA	9
CITR14798	durum	Ethiopia	Africa-3	Landrace	BB	BB	BB	BB	BB	AA	BBBBBBBBBBAA	9
PI192179	durum	Ethiopia	Africa-3	Landrace	BB	BB	BB	BB	BB	AA	BBBBBBBBBBAA	9
PI195695	durum	Ethiopia	Africa-3	Landrace	BB	BB	BB	BB	BB	AA	BBBBBBBBBBAA	9
PI298547	durum	Ethiopia	Africa-3	Landrace	BB	BB	BB	BB	BB	AA	BBBBBBBBBBAA	9
PI320114	durum	Ethiopia	Africa-3	Landrace	BB	BB	BB	BB	BB	AA	BBBBBBBBBBAA	9
PI387635	durum	Ethiopia	Africa-3	Landrace	BB	BB	BB	BB	BB	AA	BBBBBBBBBBAA	9
PI479941	durum	Ethiopia	Africa-3	Landrace	BB	BB	BB	BB	BB	AA	BBBBBBBBBBAA	9
PI479983	durum	Ethiopia	Africa-3	Landrace	BB	BB	BB	BB	BB	AA	BBBBBBBBBBAA	9
PI480139	durum	Ethiopia	Africa-3	Landrace	BB	BB	BB	BB	BB	AA	BBBBBBBBBBAA	9
PI565264	durum	Bolivia	America-3	Landrace	BB	BB	BB	BB	BB	AA	BBBBBBBBBBAA	9
CITR8164	durum	Peru	America-3	Landrace	BB	BB	BB	BB	BB	AA	BBBBBBBBBBAA	9
PI91956	durum	Peru	America-3	Landrace	BB	BB	BB	BB	BB	AA	BBBBBBBBBBAA	9
PI477867	durum	Peru	America-3	Landrace	BB	BB	BB	BB	BB	AA	BBBBBBBBBBAA	9
PI477881	durum	Peru	America-3	Landrace	BB	BB	BB	BB	BB	AA	BBBBBBBBBBAA	9
PI43340	durum	Uruguay	America-3	Landrace	BB	BB	BB	BB	BB	AA	BBBBBBBBBBAA	9
PI43341	durum	Uruguay	America-3	Landrace	BB	BB	BB	BB	BB	AA	BBBBBBBBBBAA	9
PI43342	durum	Uruguay	America-3	Landrace	BB	BB	BB	BB	BB	AA	BBBBBBBBBBAA	9
PI94701	durum	Ancient Palestine	Asia-1	Landrace	BB	BB	BB	BB	BB	AA	BBBBBBBBBBAA	9
PI94703	durum	Ancient Palestine	Asia-1	Landrace	BB	BB	BB	BB	BB	AA	BBBBBBBBBBAA	9
PI94705	durum	Ancient Palestine	Asia-1	Landrace	BB	BB	BB	BB	BB	AA	BBBBBBBBBBAA	9
PI210944	durum	Cyprus	Asia-1	Landrace	BB	BB	BB	BB	BB	AA	BBBBBBBBBBAA	9
PI210947	durum	Cyprus	Asia-1	Landrace	BB	BB	BB	BB	BB	AA	BBBBBBBBBBAA	9
PI237628	durum	Cyprus	Asia-1	Landrace	BB	BB	BB	BB	BB	AA	BBBBBBBBBBAA	9
PI313096	durum	Cyprus	Asia-1	Landrace	BB	BB	BB	BB	BB	AA	BBBBBBBBBBAA	9
PI372445	durum	Cyprus	Asia-1	Landrace	BB	BB	BB	BB	BB	AA	BBBBBBBBBBAA	9
PI372448	durum	Cyprus	Asia-1	Landrace	BB	BB	BB	BB	BB	AA	BBBBBBBBBBAA	9
PI372451	durum	Cyprus	Asia-1	Landrace	BB	BB	BB	BB	BB	AA	BBBBBBBBBBAA	9
PI372452	durum	Cyprus	Asia-1	Landrace	BB	BB	BB	BB	BB	AA	BBBBBBBBBBAA	9
PI210381	durum	Iran	Asia-1	Landrace	BB	BB	BB	BB	BB	AA	BBBBBBBBBBAA	9
PI225324	durum	Iran	Asia-1	Landrace	BB	BB	BB	BB	BB	AA	BBBBBBBBBBAA	9
PI225325	durum	Iran	Asia-1	Landrace	BB	BB	BB	BB	BB	AA	BBBBBBBBBBAA	9
PI243692	durum	Iran	Asia-1	Landrace	BB	BB	BB	BB	BB	AA	BBBBBBBBBBAA	9
PI381997	durum	Iran	Asia-1	Landrace	BB	BB	BB	BB	BB	AA	BBBBBBBBBBAA	9
PI623461	durum	Iran	Asia-1	Landrace	BB	BB	BB	BB	BB	AA	BBBBBBBBBBAA	9
PI623709	durum	Iran	Asia-1	Landrace	BB	BB	BB	BB	BB	AA	BBBBBBBBBBAA	9
PI623914	durum	Iran	Asia-1	Landrace	BB	BB	BB	BB	BB	AA	BBBBBBBBBBAA	9
PI623926	durum	Iran	Asia-1	Landrace	BB	BB	BB	BB	BB	AA	BBBBBBBBBBAA	9
PI623957	durum	Iran	Asia-1	Landrace	BB	BB	BB	BB	BB	AA	BBBBBBBBBBAA	9
PI623997	durum	Iran	Asia-1	Landrace	BB	BB	BB	BB	BB	AA	BBBBBBBBBBAA	9
PI624030	durum	Iran	Asia-1	Landrace	BB	BB	BB	BB	BB	AA	BBBBBBBBBBAA	9
PI624052	durum	Iran	Asia-1	Landrace	BB	BB	BB	BB	BB	AA	BBBBBBBBBBAA	9
PI624091	durum	Iran	Asia-1	Landrace	BB	BB	BB	BB	BB	AA	BBBBBBBBBBAA	9
PI624127	durum	Iran	Asia-1	Landrace	BB	BB	BB	BB	BB	AA	BBBBBBBBBBAA	9
PI624170	durum	Iran	Asia-1	Landrace	BB	BB	BB	BB	BB	AA	BBBBBBBBBBAA	9
PI624210	durum	Iran	Asia-1	Landrace	BB	BB	BB	BB	BB	AA	BBBBBBBBBBAA	9
PI624388	durum	Iran	Asia-1	Landrace	BB	BB	BB	BB	BB	AA	BBBBBBBBBBAA	9
PI624394	durum	Iran	Asia-1	Landrace	BB	BB	BB	BB	BB	AA	BBBBBBBBBBAA	9
PI624407	durum	Iran	Asia-1	Landrace	BB	BB	BB	BB	BB	AA	BBBBBBBBBBAA	9
PI624428	durum	Iran	Asia-1	Landrace	BB	BB	BB	BB	BB	AA	BBBBBBBBBBAA	9
PI624435	durum	Iran	Asia-1	Landrace	BB	BB	BB	BB	BB	AA	BBBBBBBBBBAA	9
PI624456	durum	Iran	Asia-1	Landrace	BB	BB	BB	BB	BB	AA	BBBBBBBBBBAA	9
PI624467	durum	Iran	Asia-1	Landrace	BB	BB	BB	BB	BB	AA	BBBBBBBBBBAA	9
PI624501	durum	Iran	Asia-1	Landrace	BB	BB	BB	BB	BB	AA	BBBBBBBBBBAA	9
PI624506	durum	Iran	Asia-1	Landrace	BB	BB	BB	BB	BB	AA	BBBBBBBBBBAA	9
PI624516	durum	Iran	Asia-1	Landrace	BB	BB	BB	BB	BB	AA	BBBBBBBBBBAA	9
PI624528	durum	Iran	Asia-1	Landrace	BB	BB	BB	BB	BB	AA	BBBBBBBBBBAA	9
PI624529	durum	Iran	Asia-1	Landrace	BB	BB	BB	BB	BB	AA	BBBBBBBBBBAA	9
PI624557	durum	Iran	Asia-1	Landrace	BB	BB	BB	BB	BB	AA	BBBBBBBBBBAA	9
PI624568	durum	Iran	Asia-1	Landrace	BB	BB	BB	BB	BB	AA	BBBBBBBBBBAA	9
PI624669	durum	Iran	Asia-1	Landrace	BB	BB	BB	BB	BB	AA	BBBBBBBBBBAA	9
PI624694	durum	Iran	Asia-1	Landrace	BB	BB	BB	BB	BB	AA	BBBBBBBBBBAA	9
PI624695	durum	Iran	Asia-1	Landrace	BB	BB	BB	BB	BB	AA	BBBBBBBBBBAA	9
PI624731	durum	Iran	Asia-1	Landrace	BB	BB	BB	BB	BB	AA	BBBBBBBBBBAA	9
PI624769	durum	Iran	Asia-1	Landrace	BB	BB	BB	BB	BB	AA	BBBBBBBBBBAA	9
PI624801	durum	Iran	Asia-1	Landrace	BB	BB	BB	BB	BB	AA	BBBBBBBBBBAA	9
PI624829	durum	Iran	Asia-1	Landrace	BB	BB	BB	BB	BB	AA	BBBBBBBBBBAA	9
PI624850	durum	Iran	Asia-1	Landrace	BB	BB	BB	BB	BB	AA	BBBBBBBBBBAA	9
PI624854	durum	Iran	Asia-1	Landrace	BB	BB	BB	BB	BB	AA	BBBBBBBBBBAA	9
PI625273	durum	Iran	Asia-1	Landrace	BB	BB	BB	BB	BB	AA	BBBBBBBBBBAA	9
PI625361	durum	Iran	Asia-1	Landrace	BB	BB	BB	BB	BB	AA	BBBBBBBBBBAA	9
PI626482	durum	Iran	Asia-1	Landrace	BB	BB	BB	BB	BB	AA	BBBBBBBBBBAA	9
PI626483	durum	Iran	Asia-1	Landrace	BB	BB	BB	BB	BB	AA	BBBBBBBBBBAA	9
PI70718	durum	Iraq	Asia-1	Landrace	BB	BB	BB	BB	BB	AA	BBBBBBBBBBAA	9
PI70720	durum	Iraq	Asia-1	Landrace	BB	BB	BB	BB	BB	AA	BBBBBBBBBBAA	9
PI70724	durum	Iraq	Asia-1	Landrace	BB	BB	BB	BB	BB	AA	BBBBBBBBBBAA	9
PI70728	durum	Iraq	Asia-1	Landrace	BB	BB	BB	BB	BB	AA	BBBBBBBBBBAA	9
PI178758	durum	Iraq	Asia-1	Landrace	BB	BB	BB	BB	BB	AA	BBBBBBBBBBAA	9
PI253960	durum	Iraq	Asia-1	Landrace	BB	BB	BB	BB	BB	AA	BBBBBBBBBBAA	9
PI253964	durum	Iraq	Asia-1	Landrace	BB	BB	BB	BB	BB	AA	BBBBBBBBBBAA	9
PI481580	durum	Iraq	Asia-1	Landrace	BB	BB	BB	BB	BB	AA	BBBBBBBBBBAA	9
PI481584	durum	Iraq	Asia-1	Landrace	BB	BB	BB	BB	BB	AA	BBBBBBBBBBAA	9
PI481585	durum	Iraq	Asia-1	Landrace	BB	BB	BB	BB	BB	AA	BBBBBBBBBBAA	9
PI292034	durum	Israel	Asia-1	Landrace	BB	BB	BB	BB	BB	AA	BBBBBBBBBBAA	9
PI384037	durum	Israel	Asia-1	Landrace	BB	BB	BB	BB	BB	AA	BBBBBBBBBBAA	9
PI113951	durum	Jordan	Asia-1	Landrace	BB	BB	BB	BB	BB	AA	BBBBBBBBBBAA	9
PI113964	durum	Jordan	Asia-1	Landrace	BB	BB	BB	BB	BB	AA	BBBBBBBBBBAA	9
PI234382	durum	Jordan	Asia-1	Landrace	BB	BB	BB	BB	BB	AA	BBBBBBBBBBAA	9
PI234386	durum	Jordan	Asia-1	Landrace	BB	BB	BB	BB	BB	AA	BBBBBBBBBBAA	9
PI234387	durum	Jordan	Asia-1	Landrace	BB	BB	BB	BB	BB	AA	BBBBBBBBBBAA	9
PI234388	durum	Jordan	Asia-1	Landrace	BB	BB	BB	BB	BB	AA	BBBBBBBBBBAA	9
PI283154	durum	Jordan	Asia-1	Landrace	BB	BB	BB	BB	BB	AA	BBBBBBBBBBAA	9
PI283155	durum	Jordan	Asia-1	Landrace	BB	BB	BB	BB	BB	AA	BBBBBBBBBBAA	9
PI487290	durum	Jordan	Asia-1	Landrace	BB	BB	BB	BB	BB	AA	BBBBBBBBBBAA	9
PI182669	durum	Lebanon	Asia-1	Landrace	BB	BB	BB	BB	BB	AA	BBBBBBBBBBAA	9
PI182671	durum	Lebanon	Asia-1	Landrace	BB	BB	BB	BB	BB	AA	BBBBBBBBBBAA	9
PI182674	durum	Lebanon	Asia-1	Landrace	BB	BB	BB	BB	BB	AA	BBBBBBBBBBAA	9
PI182738	durum	Lebanon	Asia-1	Landrace	BB	BB	BB	BB	BB	AA	BBBBBBBBBBAA	9
PI182708	durum	Syria	Asia-1	Landrace	BB	BB	BB	BB	BB	AA	BBBBBBBBBBAA	9
PI182717	durum	Syria	Asia-1	Landrace	BB	BB	BB	BB	BB	AA	BBBBBBBBBBAA	9
PI253958	durum	Syria	Asia-1	Landrace	BB	BB	BB	BB	BB	AA	BBBBBBBBBBAA	9
PI166327	durum	Turkey	Asia-1	Landrace	BB	BB	BB	BB	BB	AA	BBBBBBBBBBAA	9
PI167652	durum	Turkey	Asia-1	Landrace	BB	BB	BB	BB	BB	AA	BBBBBBBBBBAA	9
PI167730	durum	Turkey	Asia-1	Landrace	BB	BB	BB	BB	BB	AA	BBBBBBBBBBAA	9
PI172556	durum	Turkey	Asia-1	Landrace	BB	BB	BB	BB	BB	AA	BBBBBBBBBBAA	9
PI177919	durum	Turkey	Asia-1	Landrace	BB	BB	BB	BB	BB	AA	BBBBBBBBBBAA	9
PI178143	durum	Turkey	Asia-1	Landrace	BB	BB	BB	BB	BB	AA	BBBBBBBBBBAA	9
PI178156	durum	Turkey	Asia-1	Landrace	BB	BB	BB	BB	BB	AA	BBBBBBBBBBAA	9
PI182412	durum	Turkey	Asia-1	Landrace	BB	BB	BB	BB	BB	AA	BBBBBBBBBBAA	9
PI341729	durum	Turkey	Asia-1	Landrace	BB	BB	BB	BB	BB	AA	BBBBBBBBBBAA	9
PI337647	durum	Afghanistan	Asia-2	Landrace	BB	BB	BB	BB	BB	AA	BBBBBBBBBBAA	9
PI347152	durum	Afghanistan	Asia-2	Landrace	BB	BB	BB	BB	BB	AA	BBBBBBBBBBAA	9
PI347157	durum	Afghanistan	Asia-2	Landrace	BB	BB	BB	BB	BB	AA	BBBBBBBBBBAA	9
PI262675	durum	Kyrgyzstan	Asia-2	Landrace	BB	BB	BB	BB	BB	AA	BBBBBBBBBBAA	9
PI40938	durum	Pakistan	Asia-2	Landrace	BB	BB	BB	BB	BB	AA	BBBBBBBBBBAA	9
PI270001	durum	Pakistan	Asia-2	Landrace	BB	BB	BB	BB	BB	AA	BBBBBBBBBBAA	9
PI388133	durum	Pakistan	Asia-2	Landrace	BB	BB	BB	BB	BB	AA	BBBBBBBBBBAA	9
PI84529	durum	Uzbekistan	Asia-2	Landrace	BB	BB	BB	BB	BB	AA	BBBBBBBBBBAA	9
PI73366	durum	Azerbaijan	Asia-3	Landrace	BB	BB	BB	BB	BB	AA	BBBBBBBBBBAA	9
PI57194	durum	Georgia	Asia-3	Landrace	BB	BB	BB	BB	BB	AA	BBBBBBBBBBAA	9
PI78811	durum	Georgia	Asia-3	Landrace	BB	BB	BB	BB	BB	AA	BBBBBBBBBBAA	9
PI183269	durum	Saudi Arabia	Asia-4	Landrace	BB	BB	BB	BB	BB	AA	BBBBBBBBBBAA	9
PI183909	durum	Saudi Arabia	Asia-4	Landrace	BB	BB	BB	BB	BB	AA	BBBBBBBBBBAA	9
PI244061	durum	Yemen	Asia-4	Landrace	BB	BB	BB	BB	BB	AA	BBBBBBBBBBAA	9
PI429317	durum	Yemen	Asia-4	Landrace	BB	BB	BB	BB	BB	AA	BBBBBBBBBBAA	9
PI429324	durum	Yemen	Asia-4	Landrace	BB	BB	BB	BB	BB	AA	BBBBBBBBBBAA	9
PI70658	durum	China	Asia-5	Landrace	BB	BB	BB	BB	BB	AA	BBBBBBBBBBAA	9
PI74830	durum	China	Asia-5	Landrace	BB	BB	BB	BB	BB	AA	BBBBBBBBBBAA	9
PI41343	durum	India	Asia-6	Landrace	BB	BB	BB	BB	BB	AA	BBBBBBBBBBAA	9
PI41353	durum	India	Asia-6	Landrace	BB	BB	BB	BB	BB	AA	BBBBBBBBBBAA	9
PI115514	durum	India	Asia-6	Landrace	BB	BB	BB	BB	BB	AA	BBBBBBBBBBAA	9
PI176289	durum	India	Asia-6	Landrace	BB	BB	BB	BB	BB	AA	BBBBBBBBBBAA	9
PI176291	durum	India	Asia-6	Landrace	BB	BB	BB	BB	BB	AA	BBBBBBBBBBAA	9
PI324482	durum	India	Asia-6	Landrace	BB	BB	BB	BB	BB	AA	BBBBBBBBBBAA	9
PI176228	durum	Nepal	Asia-6	Landrace	BB	BB	BB	BB	BB	AA	BBBBBBBBBBAA	9
PI94710	durum	Former Soviet Union	Europe-2	Landrace	BB	BB	BB	BB	BB	AA	BBBBBBBBBBAA	9
CITR7669	durum	Russian Federation	Europe-2	Landrace	BB	BB	BB	BB	BB	AA	BBBBBBBBBBAA	9
PI32156	durum	Russian Federation	Europe-2	Landrace	BB	BB	BB	BB	BB	AA	BBBBBBBBBBAA	9
PI6020	durum	Ukraine	Europe-2	Landrace	BB	BB	BB	BB	BB	AA	BBBBBBBBBBAA	9
PI43247	durum	Greece	Europe-3	Landrace	BB	BB	BB	BB	BB	AA	BBBBBBBBBBAA	9
PI278259	durum	Greece	Europe-3	Landrace	BB	BB	BB	BB	BB	AA	BBBBBBBBBBAA	9
PI278265	durum	Greece	Europe-3	Landrace	BB	BB	BB	BB	BB	AA	BBBBBBBBBBAA	9
PI469013	durum	Greece	Europe-3	Landrace	BB	BB	BB	BB	BB	AA	BBBBBBBBBBAA	9
PI94713	durum	Italy	Europe-3	Landrace	BB	BB	BB	BB	BB	AA	BBBBBBBBBBAA	9
PI192399	durum	Italy	Europe-3	Landrace	BB	BB	BB	BB	BB	AA	BBBBBBBBBBAA	9
PI278352	durum	Italy	Europe-3	Landrace	BB	BB	BB	BB	BB	AA	BBBBBBBBBBAA	9
PI278376	durum	Malta	Europe-3	Landrace	BB	BB	BB	BB	BB	AA	BBBBBBBBBBAA	9
PI278377	durum	Malta	Europe-3	Landrace	BB	BB	BB	BB	BB	AA	BBBBBBBBBBAA	9
PI278378	durum	Malta	Europe-3	Landrace	BB	BB	BB	BB	BB	AA	BBBBBBBBBBAA	9
PI278379	durum	Malta	Europe-3	Landrace	BB	BB	BB	BB	BB	AA	BBBBBBBBBBAA	9
PI56245	durum	Portugal	Europe-3	Landrace	BB	BB	BB	BB	BB	AA	BBBBBBBBBBAA	9
PI134929	durum	Portugal	Europe-3	Landrace	BB	BB	BB	BB	BB	AA	BBBBBBBBBBAA	9
PI184641	durum	Portugal	Europe-3	Landrace	BB	BB	BB	BB	BB	AA	BBBBBBBBBBAA	9
PI185762	durum	Portugal	Europe-3	Landrace	BB	BB	BB	BB	BB	AA	BBBBBBBBBBAA	9
PI191654	durum	Portugal	Europe-3	Landrace	BB	BB	BB	BB	BB	AA	BBBBBBBBBBAA	9
PI191958	durum	Portugal	Europe-3	Landrace	BB	BB	BB	BB	BB	AA	BBBBBBBBBBAA	9
PI191972	durum	Portugal	Europe-3	Landrace	BB	BB	BB	BB	BB	AA	BBBBBBBBBBAA	9
PI192044	durum	Portugal	Europe-3	Landrace	BB	BB	BB	BB	BB	AA	BBBBBBBBBBAA	9
PI192051	durum	Portugal	Europe-3	Landrace	BB	BB	BB	BB	BB	AA	BBBBBBBBBBAA	9
PI192820	durum	Portugal	Europe-3	Landrace	BB	BB	BB	BB	BB	AA	BBBBBBBBBBAA	9
PI192836	durum	Portugal	Europe-3	Landrace	BB	BB	BB	BB	BB	AA	BBBBBBBBBBAA	9
PI192852	durum	Portugal	Europe-3	Landrace	BB	BB	BB	BB	BB	AA	BBBBBBBBBBAA	9
PI193920	durum	Portugal	Europe-3	Landrace	BB	BB	BB	BB	BB	AA	BBBBBBBBBBAA	9
PI47888	durum	Spain	Europe-3	Landrace	BB	BB	BB	BB	BB	AA	BBBBBBBBBBAA	9
PI47891	durum	Spain	Europe-3	Landrace	BB	BB	BB	BB	BB	AA	BBBBBBBBBBAA	9
PI191011	durum	Spain	Europe-3	Landrace	BB	BB	BB	BB	BB	AA	BBBBBBBBBBAA	9
PI191183	durum	Spain	Europe-3	Landrace	BB	BB	BB	BB	BB	AA	BBBBBBBBBBAA	9
PI191191	durum	Spain	Europe-3	Landrace	BB	BB	BB	BB	BB	AA	BBBBBBBBBBAA	9
PI191615	durum	Spain	Europe-3	Landrace	BB	BB	BB	BB	BB	AA	BBBBBBBBBBAA	9
PI192848	durum	Spain	Europe-3	Landrace	BB	BB	BB	BB	BB	AA	BBBBBBBBBBAA	9
PI350145	durum	Macedonia	Europe-4	Landrace	BB	BB	BB	BB	BB	AA	BBBBBBBBBBAA	9
PI390348	durum	Macedonia	Europe-4	Landrace	BB	BB	BB	BB	BB	AA	BBBBBBBBBBAA	9
PI405906	durum	Macedonia	Europe-4	Landrace	BB	BB	BB	BB	BB	AA	BBBBBBBBBBAA	9
PI405907	durum	Macedonia	Europe-4	Landrace	BB	BB	BB	BB	BB	AA	BBBBBBBBBBAA	9
PI374482	durum	Serbia	Europe-4	Landrace	BB	BB	BB	BB	BB	AA	BBBBBBBBBBAA	9
LAL_BAHADUR	common_wheat	India	Asia_spring	cultivar	AA	AA	AA	AA	AA	BB	AAAAAAAAAABB	1	1
PI322238	common_wheat	India	Asia_spring	cultivar	AA	AA	AA	AA	AA	BB	AAAAAAAAAABB	1	1
PI322250	common_wheat	India	Asia_winter	cultivar	AA	AA	AA	AA	AA	BB	AAAAAAAAAABB	1	1
AXE	common_wheat	Australia	Australia_SE_spring	cultivar	AA	AA	AA	AA	AA	BB	AAAAAAAAAABB	1
BANKS	common_wheat	Australia	Australia_SE_spring	cultivar	AA	AA	AA	AA	AA	BB	AAAAAAAAAABB	1
BATAVIA	common_wheat	Australia	Australia_SE_spring	cultivar	AA	AA	AA	AA	AA	BB	AAAAAAAAAABB	1
BAXTER	common_wheat	Australia	Australia_SE_spring	cultivar	AA	AA	AA	AA	AA	BB	AAAAAAAAAABB	1
BLADE	common_wheat	Australia	Australia_SE_spring	cultivar	AA	AA	AA	AA	AA	BB	AAAAAAAAAABB	1
BOLAC	common_wheat	Australia	Australia_SE_spring	cultivar	AA	AA	AA	AA	AA	BB	AAAAAAAAAABB	1
CATALINA	common_wheat	Australia	Australia_SE_spring	cultivar	AA	AA	AA	AA	AA	BB	AAAAAAAAAABB	1
CHARA	common_wheat	Australia	Australia_SE_spring	cultivar	AA	AA	AA	AA	AA	BB	AAAAAAAAAABB	1
COOK	common_wheat	Australia	Australia_SE_spring	cultivar	AA	AA	AA	AA	AA	BB	AAAAAAAAAABB	1	1
CRUSADER	common_wheat	Australia	Australia_SE_spring	cultivar	AA	AA	AA	AA	AA	BB	AAAAAAAAAABB	1
CUNNINGHAM	common_wheat	Australia	Australia_SE_spring	cultivar	AA	AA	AA	AA	AA	BB	AAAAAAAAAABB	1
DAGGER	common_wheat	Australia	Australia_SE_spring	cultivar	AA	AA	AA	AA	AA	BB	AAAAAAAAAABB	1
DERRIMUT	common_wheat	Australia	Australia_SE_spring	cultivar	AA	AA	AA	AA	AA	BB	AAAAAAAAAABB	1
DIRK	common_wheat	Australia	Australia_SE_spring	cultivar	AA	AA	AA	AA	AA	BB	AAAAAAAAAABB	1
EGAGREGORY	common_wheat	Australia	Australia_SE_spring	cultivar	AA	AA	AA	AA	AA	BB	AAAAAAAAAABB	1	1
EGAHUME	common_wheat	Australia	Australia_SE_spring	cultivar	AA	AA	AA	AA	AA	BB	AAAAAAAAAABB	1
EGAHUNTER	common_wheat	Australia	Australia_SE_spring	cultivar	AA	AA	AA	AA	AA	BB	AAAAAAAAAABB	1
EGAKIDMAN	common_wheat	Australia	Australia_SE_spring	cultivar	AA	AA	AA	AA	AA	BB	AAAAAAAAAABB	1
EGASTAMPEDE	common_wheat	Australia	Australia_SE_spring	cultivar	AA	AA	AA	AA	AA	BB	AAAAAAAAAABB	1
EGAWENTWORTH	common_wheat	Australia	Australia_SE_spring	cultivar	AA	AA	AA	AA	AA	BB	AAAAAAAAAABB	1
EGAWILLS	common_wheat	Australia	Australia_SE_spring	cultivar	AA	AA	AA	AA	AA	BB	AAAAAAAAAABB	1
EGAWYLIE	common_wheat	Australia	Australia_SE_spring	cultivar	AA	AA	AA	AA	AA	BB	AAAAAAAAAABB	1
EGRET	common_wheat	Australia	Australia_SE_spring	cultivar	AA	AA	AA	AA	AA	BB	AAAAAAAAAABB	1
ESPADA	common_wheat	Australia	Australia_SE_spring	cultivar	AA	AA	AA	AA	AA	BB	AAAAAAAAAABB	1
FRAME	common_wheat	Australia	Australia_SE_spring	cultivar	AA	AA	AA	AA	AA	BB	AAAAAAAAAABB	1
GBARUBY	common_wheat	Australia	Australia_SE_spring	cultivar	AA	AA	AA	AA	AA	BB	AAAAAAAAAABB	1
GILES	common_wheat	Australia	Australia_SE_spring	cultivar	AA	AA	AA	AA	AA	BB	AAAAAAAAAABB	1
GLADIUS	common_wheat	Australia	Australia_SE_spring	cultivar	AA	AA	AA	AA	AA	BB	AAAAAAAAAABB	1
GOROKE	common_wheat	Australia	Australia_SE_spring	cultivar	AA	AA	AA	AA	AA	BB	AAAAAAAAAABB	1	1
H46	common_wheat	Australia	Australia_SE_spring	cultivar	AA	AA	AA	AA	AA	BB	AAAAAAAAAABB	1
HOUTMANN	common_wheat	Australia	Australia_SE_spring	cultivar	AA	AA	AA	AA	AA	BB	AAAAAAAAAABB	1
JANZ	common_wheat	Australia	Australia_SE_spring	cultivar	AA	AA	AA	AA	AA	BB	AAAAAAAAAABB	1
KELLALAC	common_wheat	Australia	Australia_SE_spring	cultivar	AA	AA	AA	AA	AA	BB	AAAAAAAAAABB	1
KRICHAUFF	common_wheat	Australia	Australia_SE_spring	cultivar	AA	AA	AA	AA	AA	BB	AAAAAAAAAABB	1
LANG	common_wheat	Australia	Australia_SE_spring	cultivar	AA	AA	AA	AA	AA	BB	AAAAAAAAAABB	1
MILLEWA	common_wheat	Australia	Australia_SE_spring	cultivar	AA	AA	AA	AA	AA	BB	AAAAAAAAAABB	1
MOLINEUX	common_wheat	Australia	Australia_SE_spring	cultivar	AA	AA	AA	AA	AA	BB	AAAAAAAAAABB	1	1
MULGARA	common_wheat	Australia	Australia_SE_spring	cultivar	AA	AA	AA	AA	AA	BB	AAAAAAAAAABB	1
OXLEY	common_wheat	Australia	Australia_SE_spring	cultivar	AA	AA	AA	AA	AA	BB	AAAAAAAAAABB	1
PELSART	common_wheat	Australia	Australia_SE_spring	cultivar	AA	AA	AA	AA	AA	BB	AAAAAAAAAABB	1
PEROUSE	common_wheat	Australia	Australia_SE_spring	cultivar	AA	AA	AA	AA	AA	BB	AAAAAAAAAABB	1
PETRIE	common_wheat	Australia	Australia_SE_spring	cultivar	AA	AA	AA	AA	AA	BB	AAAAAAAAAABB	1
RUBRIC	common_wheat	Australia	Australia_SE_spring	cultivar	AA	AA	AA	AA	AA	BB	AAAAAAAAAABB	1
SCHOMBURG	common_wheat	Australia	Australia_SE_spring	cultivar	AA	AA	AA	AA	AA	BB	AAAAAAAAAABB	1
SCOUT	common_wheat	Australia	Australia_SE_spring	cultivar	AA	AA	AA	AA	AA	BB	AAAAAAAAAABB	1
SENTINEL	common_wheat	Australia	Australia_SE_spring	cultivar	AA	AA	AA	AA	AA	BB	AAAAAAAAAABB	1	1
SKUA	common_wheat	Australia	Australia_SE_spring	cultivar	AA	AA	AA	AA	AA	BB	AAAAAAAAAABB	1
SPEAR	common_wheat	Australia	Australia_SE_spring	cultivar	AA	AA	AA	AA	AA	BB	AAAAAAAAAABB	1
SPITFIRE	common_wheat	Australia	Australia_SE_spring	cultivar	AA	AA	AA	AA	AA	BB	AAAAAAAAAABB	1
STRZELECKI	common_wheat	Australia	Australia_SE_spring	cultivar	AA	AA	AA	AA	AA	BB	AAAAAAAAAABB	1
STRZLECKI	common_wheat	Australia	Australia_SE_spring	cultivar	AA	AA	AA	AA	AA	BB	AAAAAAAAAABB	1
STYLET	common_wheat	Australia	Australia_SE_spring	cultivar	AA	AA	AA	AA	AA	BB	AAAAAAAAAABB	1
SUN440H	common_wheat	Australia	Australia_SE_spring	cultivar	AA	AA	AA	AA	AA	BB	AAAAAAAAAABB	1
SUNBRI	common_wheat	Australia	Australia_SE_spring	cultivar	AA	AA	AA	AA	AA	BB	AAAAAAAAAABB	1
SUNBROOK	common_wheat	Australia	Australia_SE_spring	cultivar	AA	AA	AA	AA	AA	BB	AAAAAAAAAABB	1	1
SUNCO	common_wheat	Australia	Australia_SE_spring	cultivar	AA	AA	AA	AA	AA	BB	AAAAAAAAAABB	1
SUNDOR	common_wheat	Australia	Australia_SE_spring	cultivar	AA	AA	AA	AA	AA	BB	AAAAAAAAAABB	1
SUNVALE	common_wheat	Australia	Australia_SE_spring	cultivar	AA	AA	AA	AA	AA	BB	AAAAAAAAAABB	1
TRIDENT	common_wheat	Australia	Australia_SE_spring	cultivar	AA	AA	AA	AA	AA	BB	AAAAAAAAAABB	1
VENTURA	common_wheat	Australia	Australia_SE_spring	cultivar	AA	AA	AA	AA	AA	BB	AAAAAAAAAABB	1
VULCAN	common_wheat	Australia	Australia_SE_spring	cultivar	AA	AA	AA	AA	AA	BB	AAAAAAAAAABB	1
YOUNG	common_wheat	Australia	Australia_SE_spring	cultivar	AA	AA	AA	AA	AA	BB	AAAAAAAAAABB	1
ANGUS	common_wheat	Australia	Australia_W_spring	cultivar	AA	AA	AA	AA	AA	BB	AAAAAAAAAABB	1	1
ANNUELLO	common_wheat	Australia	Australia_W_spring	cultivar	AA	AA	AA	AA	AA	BB	AAAAAAAAAABB	1
AROONA	common_wheat	Australia	Australia_W_spring	cultivar	AA	AA	AA	AA	AA	BB	AAAAAAAAAABB	1
AVOCET	common_wheat	Australia	Australia_W_spring	cultivar	AA	AA	AA	AA	AA	BB	AAAAAAAAAABB	1
BRAEWOOD	common_wheat	Australia	Australia_W_spring	cultivar	AA	AA	AA	AA	AA	BB	AAAAAAAAAABB	1
BROOKTON	common_wheat	Australia	Australia_W_spring	cultivar	AA	AA	AA	AA	AA	BB	AAAAAAAAAABB	1
BULLARING	common_wheat	Australia	Australia_W_spring	cultivar	AA	AA	AA	AA	AA	BB	AAAAAAAAAABB	1
BUMPER	common_wheat	Australia	Australia_W_spring	cultivar	AA	AA	AA	AA	AA	BB	AAAAAAAAAABB	1
CALINGIRI	common_wheat	Australia	Australia_W_spring	cultivar	AA	AA	AA	AA	AA	BB	AAAAAAAAAABB	1	1
CAMM	common_wheat	Australia	Australia_W_spring	cultivar	AA	AA	AA	AA	AA	BB	AAAAAAAAAABB	1
CARINYA	common_wheat	Australia	Australia_W_spring	cultivar	AA	AA	AA	AA	AA	BB	AAAAAAAAAABB	1
CARNAMAH	common_wheat	Australia	Australia_W_spring	cultivar	AA	AA	AA	AA	AA	BB	AAAAAAAAAABB	1
CASCADES	common_wheat	Australia	Australia_W_spring	cultivar	AA	AA	AA	AA	AA	BB	AAAAAAAAAABB	1
CHAMPTAL	common_wheat	Australia	Australia_W_spring	cultivar	AA	AA	AA	AA	AA	BB	AAAAAAAAAABB	1
CORRELL	common_wheat	Australia	Australia_W_spring	cultivar	AA	AA	AA	AA	AA	BB	AAAAAAAAAABB	1
CRANBROOK	common_wheat	Australia	Australia_W_spring	cultivar	AA	AA	AA	AA	AA	BB	AAAAAAAAAABB	1	1
CUNDERDIN	common_wheat	Australia	Australia_W_spring	cultivar	AA	AA	AA	AA	AA	BB	AAAAAAAAAABB	1
EGABLANCO	common_wheat	Australia	Australia_W_spring	cultivar	AA	AA	AA	AA	AA	BB	AAAAAAAAAABB	1
EGABONNIEROCK	common_wheat	Australia	Australia_W_spring	cultivar	AA	AA	AA	AA	AA	BB	AAAAAAAAAABB	1
ENDURE	common_wheat	Australia	Australia_W_spring	cultivar	AA	AA	AA	AA	AA	BB	AAAAAAAAAABB	1
FANG	common_wheat	Australia	Australia_W_spring	cultivar	AA	AA	AA	AA	AA	BB	AAAAAAAAAABB	1	1
FORTUNE	common_wheat	Australia	Australia_W_spring	cultivar	AA	AA	AA	AA	AA	BB	AAAAAAAAAABB	1
GBASAPPHIRE	common_wheat	Australia	Australia_W_spring	cultivar	AA	AA	AA	AA	AA	BB	AAAAAAAAAABB	1
HALBERD	common_wheat	Australia	Australia_W_spring	cultivar	AA	AA	AA	AA	AA	BB	AAAAAAAAAABB	1
KALANNIE	common_wheat	Australia	Australia_W_spring	cultivar	AA	AA	AA	AA	AA	BB	AAAAAAAAAABB	1	1
KINGROCK	common_wheat	Australia	Australia_W_spring	cultivar	AA	AA	AA	AA	AA	BB	AAAAAAAAAABB	1
KULIN	common_wheat	Australia	Australia_W_spring	cultivar	AA	AA	AA	AA	AA	BB	AAAAAAAAAABB	1
NYABING	common_wheat	Australia	Australia_W_spring	cultivar	AA	AA	AA	AA	AA	BB	AAAAAAAAAABB	1
PERENJORI	common_wheat	Australia	Australia_W_spring	cultivar	AA	AA	AA	AA	AA	BB	AAAAAAAAAABB	1
STRETTON	common_wheat	Australia	Australia_W_spring	cultivar	AA	AA	AA	AA	AA	BB	AAAAAAAAAABB	1
TAMMARINROCK	common_wheat	Australia	Australia_W_spring	cultivar	AA	AA	AA	AA	AA	BB	AAAAAAAAAABB	1	1
TINCURRIN	common_wheat	Australia	Australia_W_spring	cultivar	AA	AA	AA	AA	AA	BB	AAAAAAAAAABB	1
WORRAKATTA	common_wheat	Australia	Australia_W_spring	cultivar	AA	AA	AA	AA	AA	BB	AAAAAAAAAABB	1
YANDANOOKA	common_wheat	Australia	Australia_W_spring	cultivar	AA	AA	AA	AA	AA	BB	AAAAAAAAAABB	1
ZIPPY	common_wheat	Australia	Australia_W_spring	cultivar	AA	AA	AA	AA	AA	BB	AAAAAAAAAABB	1
00H04*J3	common_wheat	Canada	CENTRAL_NORTH_spring	cultivar	AA	AA	AA	AA	AA	BB	AAAAAAAAAABB	1
BB34-CK-1-B-17	common_wheat	Canada	CENTRAL_NORTH_spring	cultivar	AA	AA	AA	AA	AA	BB	AAAAAAAAAABB	1
BD94B*D0248	common_wheat	Canada	CENTRAL_NORTH_spring	cultivar	AA	AA	AA	AA	AA	BB	AAAAAAAAAABB	1
BW361	common_wheat	Canada	CENTRAL_NORTH_spring	cultivar	AA	AA	AA	AA	AA	BB	AAAAAAAAAABB	1	1
BW379	common_wheat	Canada	CENTRAL_NORTH_spring	cultivar	AA	AA	AA	AA	AA	BB	AAAAAAAAAABB	1
BW396	common_wheat	Canada	CENTRAL_NORTH_spring	cultivar	AA	AA	AA	AA	AA	BB	AAAAAAAAAABB	1	1
BW427	common_wheat	Canada	CENTRAL_NORTH_spring	cultivar	AA	AA	AA	AA	AA	BB	AAAAAAAAAABB	1
BW431	common_wheat	Canada	CENTRAL_NORTH_spring	cultivar	AA	AA	AA	AA	AA	BB	AAAAAAAAAABB	1
BW864	common_wheat	Canada	CENTRAL_NORTH_spring	cultivar	AA	AA	AA	AA	AA	BB	AAAAAAAAAABB	1	1
BW873	common_wheat	Canada	CENTRAL_NORTH_spring	cultivar	AA	AA	AA	AA	AA	BB	AAAAAAAAAABB	1
BW897	common_wheat	Canada	CENTRAL_NORTH_spring	cultivar	AA	AA	AA	AA	AA	BB	AAAAAAAAAABB	1
BW928	common_wheat	Canada	CENTRAL_NORTH_spring	cultivar	AA	AA	AA	AA	AA	BB	AAAAAAAAAABB	1	1
CANTHATCH	common_wheat	Canada	CENTRAL_NORTH_spring	cultivar	AA	AA	AA	AA	AA	BB	AAAAAAAAAABB	1
KANE	common_wheat	Canada	CENTRAL_NORTH_spring	cultivar	AA	AA	AA	AA	AA	BB	AAAAAAAAAABB	1	1
SUPERB	common_wheat	Canada	CENTRAL_NORTH_spring	cultivar	AA	AA	AA	AA	AA	BB	AAAAAAAAAABB	1
THATCHER	common_wheat	Canada	CENTRAL_NORTH_spring	cultivar	AA	AA	AA	AA	AA	BB	AAAAAAAAAABB	1	1
00S0291-3	common_wheat	USA	CENTRAL_NORTH_spring	cultivar	AA	AA	AA	AA	AA	BB	AAAAAAAAAABB	1
01S0236-6	common_wheat	USA	CENTRAL_NORTH_spring	cultivar	AA	AA	AA	AA	AA	BB	AAAAAAAAAABB	1
01S0263-28	common_wheat	USA	CENTRAL_NORTH_spring	cultivar	AA	AA	AA	AA	AA	BB	AAAAAAAAAABB	1
01S0263-29	common_wheat	USA	CENTRAL_NORTH_spring	cultivar	AA	AA	AA	AA	AA	BB	AAAAAAAAAABB	1
01S0377-6	common_wheat	USA	CENTRAL_NORTH_spring	cultivar	AA	AA	AA	AA	AA	BB	AAAAAAAAAABB	1
02S0170-3	common_wheat	USA	CENTRAL_NORTH_spring	cultivar	AA	AA	AA	AA	AA	BB	AAAAAAAAAABB	1
02S0178-1	common_wheat	USA	CENTRAL_NORTH_spring	cultivar	AA	AA	AA	AA	AA	BB	AAAAAAAAAABB	1
03S0253-7	common_wheat	USA	CENTRAL_NORTH_spring	cultivar	AA	AA	AA	AA	AA	BB	AAAAAAAAAABB	1
98S0113-20	common_wheat	USA	CENTRAL_NORTH_spring	cultivar	AA	AA	AA	AA	AA	BB	AAAAAAAAAABB	1
98S0127-06	common_wheat	USA	CENTRAL_NORTH_spring	cultivar	AA	AA	AA	AA	AA	BB	AAAAAAAAAABB	1
CHOTEAU	common_wheat	USA	CENTRAL_NORTH_spring	cultivar	AA	AA	AA	AA	AA	BB	AAAAAAAAAABB	1
CHRIS	common_wheat	USA	CENTRAL_NORTH_spring	cultivar	AA	AA	AA	AA	AA	BB	AAAAAAAAAABB	1
KEENE	common_wheat	USA	CENTRAL_NORTH_spring	cultivar	AA	AA	AA	AA	AA	BB	AAAAAAAAAABB	1
KNUDSON	common_wheat	USA	CENTRAL_NORTH_spring	cultivar	AA	AA	AA	AA	AA	BB	AAAAAAAAAABB	1	1
MCNEAL	common_wheat	USA	CENTRAL_NORTH_spring	cultivar	AA	AA	AA	AA	AA	BB	AAAAAAAAAABB	1
MCNEALMCTH	common_wheat	USA	CENTRAL_NORTH_spring	cultivar	AA	AA	AA	AA	AA	BB	AAAAAAAAAABB	1
MN01108-6	common_wheat	USA	CENTRAL_NORTH_spring	cultivar	AA	AA	AA	AA	AA	BB	AAAAAAAAAABB	1
MN01357	common_wheat	USA	CENTRAL_NORTH_spring	cultivar	AA	AA	AA	AA	AA	BB	AAAAAAAAAABB	1
MN02072-7	common_wheat	USA	CENTRAL_NORTH_spring	cultivar	AA	AA	AA	AA	AA	BB	AAAAAAAAAABB	1
MN02149	common_wheat	USA	CENTRAL_NORTH_spring	cultivar	AA	AA	AA	AA	AA	BB	AAAAAAAAAABB	1
MN02252-A	common_wheat	USA	CENTRAL_NORTH_spring	cultivar	AA	AA	AA	AA	AA	BB	AAAAAAAAAABB	1
MN02255	common_wheat	USA	CENTRAL_NORTH_spring	cultivar	AA	AA	AA	AA	AA	BB	AAAAAAAAAABB	1
MN02268-1	common_wheat	USA	CENTRAL_NORTH_spring	cultivar	AA	AA	AA	AA	AA	BB	AAAAAAAAAABB	1
MN02296-A	common_wheat	USA	CENTRAL_NORTH_spring	cultivar	AA	AA	AA	AA	AA	BB	AAAAAAAAAABB	1
MN03119-4	common_wheat	USA	CENTRAL_NORTH_spring	cultivar	AA	AA	AA	AA	AA	BB	AAAAAAAAAABB	1
MN03130-1-62	common_wheat	USA	CENTRAL_NORTH_spring	cultivar	AA	AA	AA	AA	AA	BB	AAAAAAAAAABB	1
MN03148	common_wheat	USA	CENTRAL_NORTH_spring	cultivar	AA	AA	AA	AA	AA	BB	AAAAAAAAAABB	1
MN03196	common_wheat	USA	CENTRAL_NORTH_spring	cultivar	AA	AA	AA	AA	AA	BB	AAAAAAAAAABB	1
MN03306-1	common_wheat	USA	CENTRAL_NORTH_spring	cultivar	AA	AA	AA	AA	AA	BB	AAAAAAAAAABB	1
MN05141-2	common_wheat	USA	CENTRAL_NORTH_spring	cultivar	AA	AA	AA	AA	AA	BB	AAAAAAAAAABB	1
MN06018	common_wheat	USA	CENTRAL_NORTH_spring	cultivar	AA	AA	AA	AA	AA	BB	AAAAAAAAAABB	1
MN06075-4	common_wheat	USA	CENTRAL_NORTH_spring	cultivar	AA	AA	AA	AA	AA	BB	AAAAAAAAAABB	1
MN06102	common_wheat	USA	CENTRAL_NORTH_spring	cultivar	AA	AA	AA	AA	AA	BB	AAAAAAAAAABB	1
MN06197	common_wheat	USA	CENTRAL_NORTH_spring	cultivar	AA	AA	AA	AA	AA	BB	AAAAAAAAAABB	1
MN07098-6	common_wheat	USA	CENTRAL_NORTH_spring	cultivar	AA	AA	AA	AA	AA	BB	AAAAAAAAAABB	1
MN07187	common_wheat	USA	CENTRAL_NORTH_spring	cultivar	AA	AA	AA	AA	AA	BB	AAAAAAAAAABB	1	1
MN07191	common_wheat	USA	CENTRAL_NORTH_spring	cultivar	AA	AA	AA	AA	AA	BB	AAAAAAAAAABB	1
MN07199-6	common_wheat	USA	CENTRAL_NORTH_spring	cultivar	AA	AA	AA	AA	AA	BB	AAAAAAAAAABB	1
MN07323	common_wheat	USA	CENTRAL_NORTH_spring	cultivar	AA	AA	AA	AA	AA	BB	AAAAAAAAAABB	1
MN07338	common_wheat	USA	CENTRAL_NORTH_spring	cultivar	AA	AA	AA	AA	AA	BB	AAAAAAAAAABB	1
MN08106-6	common_wheat	USA	CENTRAL_NORTH_spring	cultivar	AA	AA	AA	AA	AA	BB	AAAAAAAAAABB	1
MN97448	common_wheat	USA	CENTRAL_NORTH_spring	cultivar	AA	AA	AA	AA	AA	BB	AAAAAAAAAABB	1
MN97518	common_wheat	USA	CENTRAL_NORTH_spring	cultivar	AA	AA	AA	AA	AA	BB	AAAAAAAAAABB	1
MN97695-4	common_wheat	USA	CENTRAL_NORTH_spring	cultivar	AA	AA	AA	AA	AA	BB	AAAAAAAAAABB	1
MN99017	common_wheat	USA	CENTRAL_NORTH_spring	cultivar	AA	AA	AA	AA	AA	BB	AAAAAAAAAABB	1
MN99112-10-2	common_wheat	USA	CENTRAL_NORTH_spring	cultivar	AA	AA	AA	AA	AA	BB	AAAAAAAAAABB	1
MN99436-6	common_wheat	USA	CENTRAL_NORTH_spring	cultivar	AA	AA	AA	AA	AA	BB	AAAAAAAAAABB	1
MO6/1-23	common_wheat	USA	CENTRAL_NORTH_spring	cultivar	AA	AA	AA	AA	AA	BB	AAAAAAAAAABB	1
MO6/1-24	common_wheat	USA	CENTRAL_NORTH_spring	cultivar	AA	AA	AA	AA	AA	BB	AAAAAAAAAABB	1
MT0008	common_wheat	USA	CENTRAL_NORTH_spring	cultivar	AA	AA	AA	AA	AA	BB	AAAAAAAAAABB	1
MT0009	common_wheat	USA	CENTRAL_NORTH_spring	cultivar	AA	AA	AA	AA	AA	BB	AAAAAAAAAABB	1
MT0063	common_wheat	USA	CENTRAL_NORTH_spring	cultivar	AA	AA	AA	AA	AA	BB	AAAAAAAAAABB	1
MT0076	common_wheat	USA	CENTRAL_NORTH_spring	cultivar	AA	AA	AA	AA	AA	BB	AAAAAAAAAABB	1	1
MT0124	common_wheat	USA	CENTRAL_NORTH_spring	cultivar	AA	AA	AA	AA	AA	BB	AAAAAAAAAABB	1
MT0147	common_wheat	USA	CENTRAL_NORTH_spring	cultivar	AA	AA	AA	AA	AA	BB	AAAAAAAAAABB	1
MT0154	common_wheat	USA	CENTRAL_NORTH_spring	cultivar	AA	AA	AA	AA	AA	BB	AAAAAAAAAABB	1
MT0158	common_wheat	USA	CENTRAL_NORTH_spring	cultivar	AA	AA	AA	AA	AA	BB	AAAAAAAAAABB	1
MT0405	common_wheat	USA	CENTRAL_NORTH_spring	cultivar	AA	AA	AA	AA	AA	BB	AAAAAAAAAABB	1
MT0562	common_wheat	USA	CENTRAL_NORTH_spring	cultivar	AA	AA	AA	AA	AA	BB	AAAAAAAAAABB	1
MT0602	common_wheat	USA	CENTRAL_NORTH_spring	cultivar	AA	AA	AA	AA	AA	BB	AAAAAAAAAABB	1
MT0608	common_wheat	USA	CENTRAL_NORTH_spring	cultivar	AA	AA	AA	AA	AA	BB	AAAAAAAAAABB	1
MT0614	common_wheat	USA	CENTRAL_NORTH_spring	cultivar	AA	AA	AA	AA	AA	BB	AAAAAAAAAABB	1
MT0617	common_wheat	USA	CENTRAL_NORTH_spring	cultivar	AA	AA	AA	AA	AA	BB	AAAAAAAAAABB	1
MT0623	common_wheat	USA	CENTRAL_NORTH_spring	cultivar	AA	AA	AA	AA	AA	BB	AAAAAAAAAABB	1
MT0624	common_wheat	USA	CENTRAL_NORTH_spring	cultivar	AA	AA	AA	AA	AA	BB	AAAAAAAAAABB	1
MT0626	common_wheat	USA	CENTRAL_NORTH_spring	cultivar	AA	AA	AA	AA	AA	BB	AAAAAAAAAABB	1
MT0627	common_wheat	USA	CENTRAL_NORTH_spring	cultivar	AA	AA	AA	AA	AA	BB	AAAAAAAAAABB	1
MT0628	common_wheat	USA	CENTRAL_NORTH_spring	cultivar	AA	AA	AA	AA	AA	BB	AAAAAAAAAABB	1
MT0638	common_wheat	USA	CENTRAL_NORTH_spring	cultivar	AA	AA	AA	AA	AA	BB	AAAAAAAAAABB	1
MT0643	common_wheat	USA	CENTRAL_NORTH_spring	cultivar	AA	AA	AA	AA	AA	BB	AAAAAAAAAABB	1
MT0645	common_wheat	USA	CENTRAL_NORTH_spring	cultivar	AA	AA	AA	AA	AA	BB	AAAAAAAAAABB	1
MT0657	common_wheat	USA	CENTRAL_NORTH_spring	cultivar	AA	AA	AA	AA	AA	BB	AAAAAAAAAABB	1
MT0666	common_wheat	USA	CENTRAL_NORTH_spring	cultivar	AA	AA	AA	AA	AA	BB	AAAAAAAAAABB	1
MT0669	common_wheat	USA	CENTRAL_NORTH_spring	cultivar	AA	AA	AA	AA	AA	BB	AAAAAAAAAABB	1
MT0713	common_wheat	USA	CENTRAL_NORTH_spring	cultivar	AA	AA	AA	AA	AA	BB	AAAAAAAAAABB	1	1
MT0832	common_wheat	USA	CENTRAL_NORTH_spring	cultivar	AA	AA	AA	AA	AA	BB	AAAAAAAAAABB	1
MT9453	common_wheat	USA	CENTRAL_NORTH_spring	cultivar	AA	AA	AA	AA	AA	BB	AAAAAAAAAABB	1
MT9602	common_wheat	USA	CENTRAL_NORTH_spring	cultivar	AA	AA	AA	AA	AA	BB	AAAAAAAAAABB	1
MT9644	common_wheat	USA	CENTRAL_NORTH_spring	cultivar	AA	AA	AA	AA	AA	BB	AAAAAAAAAABB	1
MT9662	common_wheat	USA	CENTRAL_NORTH_spring	cultivar	AA	AA	AA	AA	AA	BB	AAAAAAAAAABB	1
MT9675	common_wheat	USA	CENTRAL_NORTH_spring	cultivar	AA	AA	AA	AA	AA	BB	AAAAAAAAAABB	1
MT9806	common_wheat	USA	CENTRAL_NORTH_spring	cultivar	AA	AA	AA	AA	AA	BB	AAAAAAAAAABB	1
MT9918	common_wheat	USA	CENTRAL_NORTH_spring	cultivar	AA	AA	AA	AA	AA	BB	AAAAAAAAAABB	1
MT9923	common_wheat	USA	CENTRAL_NORTH_spring	cultivar	AA	AA	AA	AA	AA	BB	AAAAAAAAAABB	1
MT9931	common_wheat	USA	CENTRAL_NORTH_spring	cultivar	AA	AA	AA	AA	AA	BB	AAAAAAAAAABB	1
MTHW0168	common_wheat	USA	CENTRAL_NORTH_spring	cultivar	AA	AA	AA	AA	AA	BB	AAAAAAAAAABB	1
MTHW0471	common_wheat	USA	CENTRAL_NORTH_spring	cultivar	AA	AA	AA	AA	AA	BB	AAAAAAAAAABB	1
N99-0241	common_wheat	USA	CENTRAL_NORTH_spring	cultivar	AA	AA	AA	AA	AA	BB	AAAAAAAAAABB	1
ND03/1-15	common_wheat	USA	CENTRAL_NORTH_spring	cultivar	AA	AA	AA	AA	AA	BB	AAAAAAAAAABB	1
ND03/1-9	common_wheat	USA	CENTRAL_NORTH_spring	cultivar	AA	AA	AA	AA	AA	BB	AAAAAAAAAABB	1
ND04/3-20	common_wheat	USA	CENTRAL_NORTH_spring	cultivar	AA	AA	AA	AA	AA	BB	AAAAAAAAAABB	1
ND04/3-21	common_wheat	USA	CENTRAL_NORTH_spring	cultivar	AA	AA	AA	AA	AA	BB	AAAAAAAAAABB	1
ND05/1-2	common_wheat	USA	CENTRAL_NORTH_spring	cultivar	AA	AA	AA	AA	AA	BB	AAAAAAAAAABB	1
ND741	common_wheat	USA	CENTRAL_NORTH_spring	cultivar	AA	AA	AA	AA	AA	BB	AAAAAAAAAABB	1
ND747	common_wheat	USA	CENTRAL_NORTH_spring	cultivar	AA	AA	AA	AA	AA	BB	AAAAAAAAAABB	1
NDSW0217	common_wheat	USA	CENTRAL_NORTH_spring	cultivar	AA	AA	AA	AA	AA	BB	AAAAAAAAAABB	1
NDSW0345	common_wheat	USA	CENTRAL_NORTH_spring	cultivar	AA	AA	AA	AA	AA	BB	AAAAAAAAAABB	1	1
NDSW0350	common_wheat	USA	CENTRAL_NORTH_spring	cultivar	AA	AA	AA	AA	AA	BB	AAAAAAAAAABB	1
NDSW0601	common_wheat	USA	CENTRAL_NORTH_spring	cultivar	AA	AA	AA	AA	AA	BB	AAAAAAAAAABB	1
NDSW0701	common_wheat	USA	CENTRAL_NORTH_spring	cultivar	AA	AA	AA	AA	AA	BB	AAAAAAAAAABB	1
NDSW0703	common_wheat	USA	CENTRAL_NORTH_spring	cultivar	AA	AA	AA	AA	AA	BB	AAAAAAAAAABB	1
NORPRO	common_wheat	USA	CENTRAL_NORTH_spring	cultivar	AA	AA	AA	AA	AA	BB	AAAAAAAAAABB	1
SCHOLAR	common_wheat	USA	CENTRAL_NORTH_spring	cultivar	AA	AA	AA	AA	AA	BB	AAAAAAAAAABB	1
SD3618	common_wheat	USA	CENTRAL_NORTH_spring	cultivar	AA	AA	AA	AA	AA	BB	AAAAAAAAAABB	1
SD3635	common_wheat	USA	CENTRAL_NORTH_spring	cultivar	AA	AA	AA	AA	AA	BB	AAAAAAAAAABB	1
SD3668	common_wheat	USA	CENTRAL_NORTH_spring	cultivar	AA	AA	AA	AA	AA	BB	AAAAAAAAAABB	1
SD3854	common_wheat	USA	CENTRAL_NORTH_spring	cultivar	AA	AA	AA	AA	AA	BB	AAAAAAAAAABB	1
SD3997	common_wheat	USA	CENTRAL_NORTH_spring	cultivar	AA	AA	AA	AA	AA	BB	AAAAAAAAAABB	1	1
SD4001	common_wheat	USA	CENTRAL_NORTH_spring	cultivar	AA	AA	AA	AA	AA	BB	AAAAAAAAAABB	1
SD4011	common_wheat	USA	CENTRAL_NORTH_spring	cultivar	AA	AA	AA	AA	AA	BB	AAAAAAAAAABB	1
SD4024	common_wheat	USA	CENTRAL_NORTH_spring	cultivar	AA	AA	AA	AA	AA	BB	AAAAAAAAAABB	1
SD4027	common_wheat	USA	CENTRAL_NORTH_spring	cultivar	AA	AA	AA	AA	AA	BB	AAAAAAAAAABB	1
SD4036	common_wheat	USA	CENTRAL_NORTH_spring	cultivar	AA	AA	AA	AA	AA	BB	AAAAAAAAAABB	1
SD4073	common_wheat	USA	CENTRAL_NORTH_spring	cultivar	AA	AA	AA	AA	AA	BB	AAAAAAAAAABB	1
SD4076	common_wheat	USA	CENTRAL_NORTH_spring	cultivar	AA	AA	AA	AA	AA	BB	AAAAAAAAAABB	1
SPRINGYELLOWSTONE	common_wheat	USA	CENTRAL_NORTH_spring	cultivar	AA	AA	AA	AA	AA	BB	AAAAAAAAAABB	1
ULEN	common_wheat	USA	CENTRAL_NORTH_spring	cultivar	AA	AA	AA	AA	AA	BB	AAAAAAAAAABB	1
PI349430	common_wheat	Canada	CENTRAL_NORTH_winter	cultivar	AA	AA	AA	AA	AA	BB	AAAAAAAAAABB	1	1
BILL_BROWN	common_wheat	USA	CENTRAL_NORTH_winter	cultivar	AA	AA	AA	AA	AA	BB	AAAAAAAAAABB	1	1
FROID	common_wheat	USA	CENTRAL_NORTH_winter	cultivar	AA	AA	AA	AA	AA	BB	AAAAAAAAAABB	1
PRAIRIE_RED	common_wheat	USA	CENTRAL_NORTH_winter	cultivar	AA	AA	AA	AA	AA	BB	AAAAAAAAAABB	1	1
SD03164-1	common_wheat	USA	CENTRAL_NORTH_winter	cultivar	AA	AA	AA	AA	AA	BB	AAAAAAAAAABB	1
SD05W030	common_wheat	USA	CENTRAL_NORTH_winter	cultivar	AA	AA	AA	AA	AA	BB	AAAAAAAAAABB	1	1
SD05W148-1	common_wheat	USA	CENTRAL_NORTH_winter	cultivar	AA	AA	AA	AA	AA	BB	AAAAAAAAAABB	1
SD06069	common_wheat	USA	CENTRAL_NORTH_winter	cultivar	AA	AA	AA	AA	AA	BB	AAAAAAAAAABB	1	1
SD06165	common_wheat	USA	CENTRAL_NORTH_winter	cultivar	AA	AA	AA	AA	AA	BB	AAAAAAAAAABB	1
SD06173	common_wheat	USA	CENTRAL_NORTH_winter	cultivar	AA	AA	AA	AA	AA	BB	AAAAAAAAAABB	1
SD06W117	common_wheat	USA	CENTRAL_NORTH_winter	cultivar	AA	AA	AA	AA	AA	BB	AAAAAAAAAABB	1	1
SD07056	common_wheat	USA	CENTRAL_NORTH_winter	cultivar	AA	AA	AA	AA	AA	BB	AAAAAAAAAABB	1
SD07126	common_wheat	USA	CENTRAL_NORTH_winter	cultivar	AA	AA	AA	AA	AA	BB	AAAAAAAAAABB	1
SD07165	common_wheat	USA	CENTRAL_NORTH_winter	cultivar	AA	AA	AA	AA	AA	BB	AAAAAAAAAABB	1	1
SD07184	common_wheat	USA	CENTRAL_NORTH_winter	cultivar	AA	AA	AA	AA	AA	BB	AAAAAAAAAABB	1
SD07204	common_wheat	USA	CENTRAL_NORTH_winter	cultivar	AA	AA	AA	AA	AA	BB	AAAAAAAAAABB	1
SD07220	common_wheat	USA	CENTRAL_NORTH_winter	cultivar	AA	AA	AA	AA	AA	BB	AAAAAAAAAABB	1
SD07W041	common_wheat	USA	CENTRAL_NORTH_winter	cultivar	AA	AA	AA	AA	AA	BB	AAAAAAAAAABB	1
PI447382	common_wheat	China	China_spring	cultivar	AA	AA	AA	AA	AA	BB	AAAAAAAAAABB	1	1
PI611477	common_wheat	China	China_spring	cultivar	AA	AA	AA	AA	AA	BB	AAAAAAAAAABB	1	1
PI615321	common_wheat	China	China_spring	cultivar	AA	AA	AA	AA	AA	BB	AAAAAAAAAABB	1	1
MIANYANG26	common_wheat	USA	China_spring	cultivar	AA	AA	AA	AA	AA	BB	AAAAAAAAAABB	1	1
XIANGMAI10	common_wheat	USA	China_spring	cultivar	AA	AA	AA	AA	AA	BB	AAAAAAAAAABB	1	1
XINONG918	common_wheat	USA	China_spring	cultivar	AA	AA	AA	AA	AA	BB	AAAAAAAAAABB	1	1
XUMAI31	common_wheat	USA	China_spring	cultivar	AA	AA	AA	AA	AA	BB	AAAAAAAAAABB	1	1
YANGMAI2	common_wheat	USA	China_spring	cultivar	AA	AA	AA	AA	AA	BB	AAAAAAAAAABB	1	1
YU29	common_wheat	USA	China_spring	cultivar	AA	AA	AA	AA	AA	BB	AAAAAAAAAABB	1	1
PI462143	common_wheat	China	China_winter	cultivar	AA	AA	AA	AA	AA	BB	AAAAAAAAAABB	1	1
CHUANMAI28	common_wheat	USA	China_winter	cultivar	AA	AA	AA	AA	AA	BB	AAAAAAAAAABB	1	1
EEN1	common_wheat	USA	China_winter	cultivar	AA	AA	AA	AA	AA	BB	AAAAAAAAAABB	1	1
HUA512-DR1	common_wheat	USA	China_winter	cultivar	AA	AA	AA	AA	AA	BB	AAAAAAAAAABB	1	1
HUAI9440	common_wheat	USA	China_winter	cultivar	AA	AA	AA	AA	AA	BB	AAAAAAAAAABB	1	1
HUAIMAI19	common_wheat	USA	China_winter	cultivar	AA	AA	AA	AA	AA	BB	AAAAAAAAAABB	1	1
HUAIMAI9467	common_wheat	USA	China_winter	cultivar	AA	AA	AA	AA	AA	BB	AAAAAAAAAABB	1	1
NINGZI18	common_wheat	USA	China_winter	cultivar	AA	AA	AA	AA	AA	BB	AAAAAAAAAABB	1	1
SHAN107-6	common_wheat	USA	China_winter	cultivar	AA	AA	AA	AA	AA	BB	AAAAAAAAAABB	1	1
XUMAI30	common_wheat	USA	China_winter	cultivar	AA	AA	AA	AA	AA	BB	AAAAAAAAAABB	1	1
XUZHOU25	common_wheat	USA	China_winter	cultivar	AA	AA	AA	AA	AA	BB	AAAAAAAAAABB	1	1
ZHEN9759	common_wheat	USA	China_winter	cultivar	AA	AA	AA	AA	AA	BB	AAAAAAAAAABB	1	1
ZHOUMAI11	common_wheat	USA	China_winter	cultivar	AA	AA	AA	AA	AA	BB	AAAAAAAAAABB	1	1
001169-7E15	common_wheat	USA	EAST_winter	cultivar	AA	AA	AA	AA	AA	BB	AAAAAAAAAABB	1
011388-8-4-5	common_wheat	USA	EAST_winter	cultivar	AA	AA	AA	AA	AA	BB	AAAAAAAAAABB	1
031086-44-4-2	common_wheat	USA	EAST_winter	cultivar	AA	AA	AA	AA	AA	BB	AAAAAAAAAABB	1
051336-B-B-1	common_wheat	USA	EAST_winter	cultivar	AA	AA	AA	AA	AA	BB	AAAAAAAAAABB	1
071694-G5-G5-G1PUB	common_wheat	USA	EAST_winter	cultivar	AA	AA	AA	AA	AA	BB	AAAAAAAAAABB	1
09-60-58-1	common_wheat	USA	EAST_winter	cultivar	AA	AA	AA	AA	AA	BB	AAAAAAAAAABB	1
09283-G1-G1	common_wheat	USA	EAST_winter	cultivar	AA	AA	AA	AA	AA	BB	AAAAAAAAAABB	1
11-3-10-1	common_wheat	USA	EAST_winter	cultivar	AA	AA	AA	AA	AA	BB	AAAAAAAAAABB	1
13-3_391-1-5	common_wheat	USA	EAST_winter	cultivar	AA	AA	AA	AA	AA	BB	AAAAAAAAAABB	1
13-4_715-4-5	common_wheat	USA	EAST_winter	cultivar	AA	AA	AA	AA	AA	BB	AAAAAAAAAABB	1
1724-1-1	common_wheat	USA	EAST_winter	cultivar	AA	AA	AA	AA	AA	BB	AAAAAAAAAABB	1
222-22-5	common_wheat	USA	EAST_winter	cultivar	AA	AA	AA	AA	AA	BB	AAAAAAAAAABB	1
293-10-1	common_wheat	USA	EAST_winter	cultivar	AA	AA	AA	AA	AA	BB	AAAAAAAAAABB	1
991227-6A33	common_wheat	USA	EAST_winter	cultivar	AA	AA	AA	AA	AA	BB	AAAAAAAAAABB	1	1
991371-6E12	common_wheat	USA	EAST_winter	cultivar	AA	AA	AA	AA	AA	BB	AAAAAAAAAABB	1
ADENA	common_wheat	USA	EAST_winter	cultivar	AA	AA	AA	AA	AA	BB	AAAAAAAAAABB	1
AG2020	common_wheat	USA	EAST_winter	cultivar	AA	AA	AA	AA	AA	BB	AAAAAAAAAABB	1
AGS2010	common_wheat	USA	EAST_winter	cultivar	AA	AA	AA	AA	AA	BB	AAAAAAAAAABB	1
AGS2020	common_wheat	USA	EAST_winter	cultivar	AA	AA	AA	AA	AA	BB	AAAAAAAAAABB	1
AGS2026	common_wheat	USA	EAST_winter	cultivar	AA	AA	AA	AA	AA	BB	AAAAAAAAAABB	1
AGS2031	common_wheat	USA	EAST_winter	cultivar	AA	AA	AA	AA	AA	BB	AAAAAAAAAABB	1
AGS2485	common_wheat	USA	EAST_winter	cultivar	AA	AA	AA	AA	AA	BB	AAAAAAAAAABB	1
AGSCL7	common_wheat	USA	EAST_winter	cultivar	AA	AA	AA	AA	AA	BB	AAAAAAAAAABB	1
ARENAEXP.	common_wheat	USA	EAST_winter	cultivar	AA	AA	AA	AA	AA	BB	AAAAAAAAAABB	1
ARS05-0074	common_wheat	USA	EAST_winter	cultivar	AA	AA	AA	AA	AA	BB	AAAAAAAAAABB	1
ARS05-0282	common_wheat	USA	EAST_winter	cultivar	AA	AA	AA	AA	AA	BB	AAAAAAAAAABB	1
ARS05-0401	common_wheat	USA	EAST_winter	cultivar	AA	AA	AA	AA	AA	BB	AAAAAAAAAABB	1
ARS05-0441	common_wheat	USA	EAST_winter	cultivar	AA	AA	AA	AA	AA	BB	AAAAAAAAAABB	1
ARS07-0154	common_wheat	USA	EAST_winter	cultivar	AA	AA	AA	AA	AA	BB	AAAAAAAAAABB	1
ARS07-0203	common_wheat	USA	EAST_winter	cultivar	AA	AA	AA	AA	AA	BB	AAAAAAAAAABB	1
ARS07-0404	common_wheat	USA	EAST_winter	cultivar	AA	AA	AA	AA	AA	BB	AAAAAAAAAABB	1	1
ARS07-0525	common_wheat	USA	EAST_winter	cultivar	AA	AA	AA	AA	AA	BB	AAAAAAAAAABB	1
ARS07-0815	common_wheat	USA	EAST_winter	cultivar	AA	AA	AA	AA	AA	BB	AAAAAAAAAABB	1
ARS07-0912	common_wheat	USA	EAST_winter	cultivar	AA	AA	AA	AA	AA	BB	AAAAAAAAAABB	1
ARS07-1208	common_wheat	USA	EAST_winter	cultivar	AA	AA	AA	AA	AA	BB	AAAAAAAAAABB	1
ARS07-1243	common_wheat	USA	EAST_winter	cultivar	AA	AA	AA	AA	AA	BB	AAAAAAAAAABB	1
ARS08-0111	common_wheat	USA	EAST_winter	cultivar	AA	AA	AA	AA	AA	BB	AAAAAAAAAABB	1
ARS09-435	common_wheat	USA	EAST_winter	cultivar	AA	AA	AA	AA	AA	BB	AAAAAAAAAABB	1
ARS09-443	common_wheat	USA	EAST_winter	cultivar	AA	AA	AA	AA	AA	BB	AAAAAAAAAABB	1
ARS09-776	common_wheat	USA	EAST_winter	cultivar	AA	AA	AA	AA	AA	BB	AAAAAAAAAABB	1
BALDROCK	common_wheat	USA	EAST_winter	cultivar	AA	AA	AA	AA	AA	BB	AAAAAAAAAABB	1
BALDWIN	common_wheat	USA	EAST_winter	cultivar	AA	AA	AA	AA	AA	BB	AAAAAAAAAABB	1
BLAZER	common_wheat	USA	EAST_winter	cultivar	AA	AA	AA	AA	AA	BB	AAAAAAAAAABB	1
BOONE	common_wheat	USA	EAST_winter	cultivar	AA	AA	AA	AA	AA	BB	AAAAAAAAAABB	1
BRADFORD	common_wheat	USA	EAST_winter	cultivar	AA	AA	AA	AA	AA	BB	AAAAAAAAAABB	1
CALDWELL	common_wheat	USA	EAST_winter	cultivar	AA	AA	AA	AA	AA	BB	AAAAAAAAAABB	1
CARDINAL	common_wheat	USA	EAST_winter	cultivar	AA	AA	AA	AA	AA	BB	AAAAAAAAAABB	1
CHANCELLOR	common_wheat	USA	EAST_winter	cultivar	AA	AA	AA	AA	AA	BB	AAAAAAAAAABB	1
CHESAPEAKE	common_wheat	USA	EAST_winter	cultivar	AA	AA	AA	AA	AA	BB	AAAAAAAAAABB	1
CLEMENS	common_wheat	USA	EAST_winter	cultivar	AA	AA	AA	AA	AA	BB	AAAAAAAAAABB	1
CLEMSON201	common_wheat	USA	EAST_winter	cultivar	AA	AA	AA	AA	AA	BB	AAAAAAAAAABB	1
COKER47-27(NC)	common_wheat	USA	EAST_winter	cultivar	AA	AA	AA	AA	AA	BB	AAAAAAAAAABB	1
COKER65-20	common_wheat	USA	EAST_winter	cultivar	AA	AA	AA	AA	AA	BB	AAAAAAAAAABB	1
COKER762	common_wheat	USA	EAST_winter	cultivar	AA	AA	AA	AA	AA	BB	AAAAAAAAAABB	1
COKER833	common_wheat	USA	EAST_winter	cultivar	AA	AA	AA	AA	AA	BB	AAAAAAAAAABB	1
COKER9152	common_wheat	USA	EAST_winter	cultivar	AA	AA	AA	AA	AA	BB	AAAAAAAAAABB	1	1
COKER9436	common_wheat	USA	EAST_winter	cultivar	AA	AA	AA	AA	AA	BB	AAAAAAAAAABB	1
COKER9553	common_wheat	USA	EAST_winter	cultivar	AA	AA	AA	AA	AA	BB	AAAAAAAAAABB	1
COKER9766	common_wheat	USA	EAST_winter	cultivar	AA	AA	AA	AA	AA	BB	AAAAAAAAAABB	1
COKER983	common_wheat	USA	EAST_winter	cultivar	AA	AA	AA	AA	AA	BB	AAAAAAAAAABB	1
DELTAKINGGR9108	common_wheat	USA	EAST_winter	cultivar	AA	AA	AA	AA	AA	BB	AAAAAAAAAABB	1
DELTA_QUEEN	common_wheat	USA	EAST_winter	cultivar	AA	AA	AA	AA	AA	BB	AAAAAAAAAABB	1
DOUBLECROP	common_wheat	USA	EAST_winter	cultivar	AA	AA	AA	AA	AA	BB	AAAAAAAAAABB	1
FAIRFIELD	common_wheat	USA	EAST_winter	cultivar	AA	AA	AA	AA	AA	BB	AAAAAAAAAABB	1
FG95195	common_wheat	USA	EAST_winter	cultivar	AA	AA	AA	AA	AA	BB	AAAAAAAAAABB	1
FL-302	common_wheat	USA	EAST_winter	cultivar	AA	AA	AA	AA	AA	BB	AAAAAAAAAABB	1
FLINT	common_wheat	USA	EAST_winter	cultivar	AA	AA	AA	AA	AA	BB	AAAAAAAAAABB	1
FORWARD	common_wheat	USA	EAST_winter	cultivar	AA	AA	AA	AA	AA	BB	AAAAAAAAAABB	1
FULCASTER	common_wheat	USA	EAST_winter	cultivar	AA	AA	AA	AA	AA	BB	AAAAAAAAAABB	1
FULTZ	common_wheat	USA	EAST_winter	cultivar	AA	AA	AA	AA	AA	BB	AAAAAAAAAABB	1
G69202	common_wheat	USA	EAST_winter	cultivar	AA	AA	AA	AA	AA	BB	AAAAAAAAAABB	1
GA00067-8E35	common_wheat	USA	EAST_winter	cultivar	AA	AA	AA	AA	AA	BB	AAAAAAAAAABB	1
GA001138-8E36	common_wheat	USA	EAST_winter	cultivar	AA	AA	AA	AA	AA	BB	AAAAAAAAAABB	1
GA011493-8E18	common_wheat	USA	EAST_winter	cultivar	AA	AA	AA	AA	AA	BB	AAAAAAAAAABB	1
GA021245-9E16	common_wheat	USA	EAST_winter	cultivar	AA	AA	AA	AA	AA	BB	AAAAAAAAAABB	1
GA021338-9E15	common_wheat	USA	EAST_winter	cultivar	AA	AA	AA	AA	AA	BB	AAAAAAAAAABB	1
GA031238-7E34	common_wheat	USA	EAST_winter	cultivar	AA	AA	AA	AA	AA	BB	AAAAAAAAAABB	1
GA1123	common_wheat	USA	EAST_winter	cultivar	AA	AA	AA	AA	AA	BB	AAAAAAAAAABB	1
GA991227-6A33	common_wheat	USA	EAST_winter	cultivar	AA	AA	AA	AA	AA	BB	AAAAAAAAAABB	1	1
GA991371-6E13	common_wheat	USA	EAST_winter	cultivar	AA	AA	AA	AA	AA	BB	AAAAAAAAAABB	1
GENESEE	common_wheat	USA	EAST_winter	cultivar	AA	AA	AA	AA	AA	BB	AAAAAAAAAABB	1
GLORY	common_wheat	USA	EAST_winter	cultivar	AA	AA	AA	AA	AA	BB	AAAAAAAAAABB	1
GOENS	common_wheat	USA	EAST_winter	cultivar	AA	AA	AA	AA	AA	BB	AAAAAAAAAABB	1
GR860	common_wheat	USA	EAST_winter	cultivar	AA	AA	AA	AA	AA	BB	AAAAAAAAAABB	1
GR942	common_wheat	USA	EAST_winter	cultivar	AA	AA	AA	AA	AA	BB	AAAAAAAAAABB	1
HART	common_wheat	USA	EAST_winter	cultivar	AA	AA	AA	AA	AA	BB	AAAAAAAAAABB	1
HARUS	common_wheat	USA	EAST_winter	cultivar	AA	AA	AA	AA	AA	BB	AAAAAAAAAABB	1
HARVESTQUEEN	common_wheat	USA	EAST_winter	cultivar	AA	AA	AA	AA	AA	BB	AAAAAAAAAABB	1
HICKORY	common_wheat	USA	EAST_winter	cultivar	AA	AA	AA	AA	AA	BB	AAAAAAAAAABB	1
HILLSDALE	common_wheat	USA	EAST_winter	cultivar	AA	AA	AA	AA	AA	BB	AAAAAAAAAABB	1
HOLLEY	common_wheat	USA	EAST_winter	cultivar	AA	AA	AA	AA	AA	BB	AAAAAAAAAABB	1
HOPEWELL	common_wheat	USA	EAST_winter	cultivar	AA	AA	AA	AA	AA	BB	AAAAAAAAAABB	1
HUNTER	common_wheat	USA	EAST_winter	cultivar	AA	AA	AA	AA	AA	BB	AAAAAAAAAABB	1
IL00-8061	common_wheat	USA	EAST_winter	cultivar	AA	AA	AA	AA	AA	BB	AAAAAAAAAABB	1
IL00-8530	common_wheat	USA	EAST_winter	cultivar	AA	AA	AA	AA	AA	BB	AAAAAAAAAABB	1
IL00-8633	common_wheat	USA	EAST_winter	cultivar	AA	AA	AA	AA	AA	BB	AAAAAAAAAABB	1
IL00-8641	common_wheat	USA	EAST_winter	cultivar	AA	AA	AA	AA	AA	BB	AAAAAAAAAABB	1
IL05-4236	common_wheat	USA	EAST_winter	cultivar	AA	AA	AA	AA	AA	BB	AAAAAAAAAABB	1
IL06-13721	common_wheat	USA	EAST_winter	cultivar	AA	AA	AA	AA	AA	BB	AAAAAAAAAABB	1
IL06-14262	common_wheat	USA	EAST_winter	cultivar	AA	AA	AA	AA	AA	BB	AAAAAAAAAABB	1
IL06-23571	common_wheat	USA	EAST_winter	cultivar	AA	AA	AA	AA	AA	BB	AAAAAAAAAABB	1
IL07-14547	common_wheat	USA	EAST_winter	cultivar	AA	AA	AA	AA	AA	BB	AAAAAAAAAABB	1
IL07-19062	common_wheat	USA	EAST_winter	cultivar	AA	AA	AA	AA	AA	BB	AAAAAAAAAABB	1
IL08-24578	common_wheat	USA	EAST_winter	cultivar	AA	AA	AA	AA	AA	BB	AAAAAAAAAABB	1
IL08-8844	common_wheat	USA	EAST_winter	cultivar	AA	AA	AA	AA	AA	BB	AAAAAAAAAABB	1
ILLINICHIEF	common_wheat	USA	EAST_winter	cultivar	AA	AA	AA	AA	AA	BB	AAAAAAAAAABB	1
INW0101	common_wheat	USA	EAST_winter	cultivar	AA	AA	AA	AA	AA	BB	AAAAAAAAAABB	1
JACKSON	common_wheat	USA	EAST_winter	cultivar	AA	AA	AA	AA	AA	BB	AAAAAAAAAABB	1
KANQUEEN	common_wheat	USA	EAST_winter	cultivar	AA	AA	AA	AA	AA	BB	AAAAAAAAAABB	1
KASKASKIA	common_wheat	USA	EAST_winter	cultivar	AA	AA	AA	AA	AA	BB	AAAAAAAAAABB	1
KENOSHA	common_wheat	USA	EAST_winter	cultivar	AA	AA	AA	AA	AA	BB	AAAAAAAAAABB	1
KEY	common_wheat	USA	EAST_winter	cultivar	AA	AA	AA	AA	AA	BB	AAAAAAAAAABB	1
KY02C-1043-04	common_wheat	USA	EAST_winter	cultivar	AA	AA	AA	AA	AA	BB	AAAAAAAAAABB	1
KY02C-1058-03	common_wheat	USA	EAST_winter	cultivar	AA	AA	AA	AA	AA	BB	AAAAAAAAAABB	1	1
KY02C-1076-07	common_wheat	USA	EAST_winter	cultivar	AA	AA	AA	AA	AA	BB	AAAAAAAAAABB	1
KY02C-1121-11	common_wheat	USA	EAST_winter	cultivar	AA	AA	AA	AA	AA	BB	AAAAAAAAAABB	1
KY02C-2215-02	common_wheat	USA	EAST_winter	cultivar	AA	AA	AA	AA	AA	BB	AAAAAAAAAABB	1
KY03C-1002-02	common_wheat	USA	EAST_winter	cultivar	AA	AA	AA	AA	AA	BB	AAAAAAAAAABB	1
KY03C-1237-39	common_wheat	USA	EAST_winter	cultivar	AA	AA	AA	AA	AA	BB	AAAAAAAAAABB	1
KY96C-0769-7-3	common_wheat	USA	EAST_winter	cultivar	AA	AA	AA	AA	AA	BB	AAAAAAAAAABB	1
KY97C-0321-02-01	common_wheat	USA	EAST_winter	cultivar	AA	AA	AA	AA	AA	BB	AAAAAAAAAABB	1
KY97C-0321-05-2	common_wheat	USA	EAST_winter	cultivar	AA	AA	AA	AA	AA	BB	AAAAAAAAAABB	1
KY97C-0519-04-05	common_wheat	USA	EAST_winter	cultivar	AA	AA	AA	AA	AA	BB	AAAAAAAAAABB	1
LA0110D-150	common_wheat	USA	EAST_winter	cultivar	AA	AA	AA	AA	AA	BB	AAAAAAAAAABB	1
LA01138D-52	common_wheat	USA	EAST_winter	cultivar	AA	AA	AA	AA	AA	BB	AAAAAAAAAABB	1
LA02-923	common_wheat	USA	EAST_winter	cultivar	AA	AA	AA	AA	AA	BB	AAAAAAAAAABB	1
LA02015E201	common_wheat	USA	EAST_winter	cultivar	AA	AA	AA	AA	AA	BB	AAAAAAAAAABB	1
LA02015E42	common_wheat	USA	EAST_winter	cultivar	AA	AA	AA	AA	AA	BB	AAAAAAAAAABB	1
LA02015E58	common_wheat	USA	EAST_winter	cultivar	AA	AA	AA	AA	AA	BB	AAAAAAAAAABB	1
LA02024E12	common_wheat	USA	EAST_winter	cultivar	AA	AA	AA	AA	AA	BB	AAAAAAAAAABB	1
LA02024E7	common_wheat	USA	EAST_winter	cultivar	AA	AA	AA	AA	AA	BB	AAAAAAAAAABB	1
LA03118E117	common_wheat	USA	EAST_winter	cultivar	AA	AA	AA	AA	AA	BB	AAAAAAAAAABB	1
LA03136E71	common_wheat	USA	EAST_winter	cultivar	AA	AA	AA	AA	AA	BB	AAAAAAAAAABB	1
LA03148E12	common_wheat	USA	EAST_winter	cultivar	AA	AA	AA	AA	AA	BB	AAAAAAAAAABB	1
LA03155D-P13	common_wheat	USA	EAST_winter	cultivar	AA	AA	AA	AA	AA	BB	AAAAAAAAAABB	1
LA03161D-P1	common_wheat	USA	EAST_winter	cultivar	AA	AA	AA	AA	AA	BB	AAAAAAAAAABB	1
LA03217D-P2	common_wheat	USA	EAST_winter	cultivar	AA	AA	AA	AA	AA	BB	AAAAAAAAAABB	1
LA03217E2	common_wheat	USA	EAST_winter	cultivar	AA	AA	AA	AA	AA	BB	AAAAAAAAAABB	1
LA04013D-142	common_wheat	USA	EAST_winter	cultivar	AA	AA	AA	AA	AA	BB	AAAAAAAAAABB	1
LA04041D-10	common_wheat	USA	EAST_winter	cultivar	AA	AA	AA	AA	AA	BB	AAAAAAAAAABB	1
LA841	common_wheat	USA	EAST_winter	cultivar	AA	AA	AA	AA	AA	BB	AAAAAAAAAABB	1
LA95135	common_wheat	USA	EAST_winter	cultivar	AA	AA	AA	AA	AA	BB	AAAAAAAAAABB	1
LA99005UC-31-3-C	common_wheat	USA	EAST_winter	cultivar	AA	AA	AA	AA	AA	BB	AAAAAAAAAABB	1
MADISON	common_wheat	USA	EAST_winter	cultivar	AA	AA	AA	AA	AA	BB	AAAAAAAAAABB	1
MAGNOLIA	common_wheat	USA	EAST_winter	cultivar	AA	AA	AA	AA	AA	BB	AAAAAAAAAABB	1
MASSEY	common_wheat	USA	EAST_winter	cultivar	AA	AA	AA	AA	AA	BB	AAAAAAAAAABB	1
MCCORMICK	common_wheat	USA	EAST_winter	cultivar	AA	AA	AA	AA	AA	BB	AAAAAAAAAABB	1
MD01W215-05-10	common_wheat	USA	EAST_winter	cultivar	AA	AA	AA	AA	AA	BB	AAAAAAAAAABB	1
MD01W28-08-11	common_wheat	USA	EAST_winter	cultivar	AA	AA	AA	AA	AA	BB	AAAAAAAAAABB	1
MD99W460-06-31	common_wheat	USA	EAST_winter	cultivar	AA	AA	AA	AA	AA	BB	AAAAAAAAAABB	1
MERL	common_wheat	USA	EAST_winter	cultivar	AA	AA	AA	AA	AA	BB	AAAAAAAAAABB	1
MPV57	common_wheat	USA	EAST_winter	cultivar	AA	AA	AA	AA	AA	BB	AAAAAAAAAABB	1
NC-CAPEFEAR	common_wheat	USA	EAST_winter	cultivar	AA	AA	AA	AA	AA	BB	AAAAAAAAAABB	1
NC03-6228	common_wheat	USA	EAST_winter	cultivar	AA	AA	AA	AA	AA	BB	AAAAAAAAAABB	1
NC06-19896	common_wheat	USA	EAST_winter	cultivar	AA	AA	AA	AA	AA	BB	AAAAAAAAAABB	1
NC06-20401	common_wheat	USA	EAST_winter	cultivar	AA	AA	AA	AA	AA	BB	AAAAAAAAAABB	1
NC06BGTAG12	common_wheat	USA	EAST_winter	cultivar	AA	AA	AA	AA	AA	BB	AAAAAAAAAABB	1
NC07-20850	common_wheat	USA	EAST_winter	cultivar	AA	AA	AA	AA	AA	BB	AAAAAAAAAABB	1
NC07-23880	common_wheat	USA	EAST_winter	cultivar	AA	AA	AA	AA	AA	BB	AAAAAAAAAABB	1
NC07-24445	common_wheat	USA	EAST_winter	cultivar	AA	AA	AA	AA	AA	BB	AAAAAAAAAABB	1
NC08-23089	common_wheat	USA	EAST_winter	cultivar	AA	AA	AA	AA	AA	BB	AAAAAAAAAABB	1
NC08-23090	common_wheat	USA	EAST_winter	cultivar	AA	AA	AA	AA	AA	BB	AAAAAAAAAABB	1
NC08-23323	common_wheat	USA	EAST_winter	cultivar	AA	AA	AA	AA	AA	BB	AAAAAAAAAABB	1
NC08-23324	common_wheat	USA	EAST_winter	cultivar	AA	AA	AA	AA	AA	BB	AAAAAAAAAABB	1
NC08-23383	common_wheat	USA	EAST_winter	cultivar	AA	AA	AA	AA	AA	BB	AAAAAAAAAABB	1
NC08-23925	common_wheat	USA	EAST_winter	cultivar	AA	AA	AA	AA	AA	BB	AAAAAAAAAABB	1
NC09BGTS16	common_wheat	USA	EAST_winter	cultivar	AA	AA	AA	AA	AA	BB	AAAAAAAAAABB	1
NC09BGTUM15	common_wheat	USA	EAST_winter	cultivar	AA	AA	AA	AA	AA	BB	AAAAAAAAAABB	1
NC96BGTA4	common_wheat	USA	EAST_winter	cultivar	AA	AA	AA	AA	AA	BB	AAAAAAAAAABB	1
NC96BGTA5	common_wheat	USA	EAST_winter	cultivar	AA	AA	AA	AA	AA	BB	AAAAAAAAAABB	1
NC96BGTA6	common_wheat	USA	EAST_winter	cultivar	AA	AA	AA	AA	AA	BB	AAAAAAAAAABB	1
NC96BGTD1	common_wheat	USA	EAST_winter	cultivar	AA	AA	AA	AA	AA	BB	AAAAAAAAAABB	1
NC96BGTD2	common_wheat	USA	EAST_winter	cultivar	AA	AA	AA	AA	AA	BB	AAAAAAAAAABB	1
NC96BGTD3	common_wheat	USA	EAST_winter	cultivar	AA	AA	AA	AA	AA	BB	AAAAAAAAAABB	1
NC97BGTAB10	common_wheat	USA	EAST_winter	cultivar	AA	AA	AA	AA	AA	BB	AAAAAAAAAABB	1
NC97BGTAB9	common_wheat	USA	EAST_winter	cultivar	AA	AA	AA	AA	AA	BB	AAAAAAAAAABB	1
NC97BGTD7	common_wheat	USA	EAST_winter	cultivar	AA	AA	AA	AA	AA	BB	AAAAAAAAAABB	1
NC97BGTD8	common_wheat	USA	EAST_winter	cultivar	AA	AA	AA	AA	AA	BB	AAAAAAAAAABB	1
NC99BGTAG11	common_wheat	USA	EAST_winter	cultivar	AA	AA	AA	AA	AA	BB	AAAAAAAAAABB	1
NW12	common_wheat	USA	EAST_winter	cultivar	AA	AA	AA	AA	AA	BB	AAAAAAAAAABB	1
OGLETHORPE	common_wheat	USA	EAST_winter	cultivar	AA	AA	AA	AA	AA	BB	AAAAAAAAAABB	1
OH02-12678	common_wheat	USA	EAST_winter	cultivar	AA	AA	AA	AA	AA	BB	AAAAAAAAAABB	1
OH02-7217	common_wheat	USA	EAST_winter	cultivar	AA	AA	AA	AA	AA	BB	AAAAAAAAAABB	1
OH03-41-45	common_wheat	USA	EAST_winter	cultivar	AA	AA	AA	AA	AA	BB	AAAAAAAAAABB	1
P0527A1-9	common_wheat	USA	EAST_winter	cultivar	AA	AA	AA	AA	AA	BB	AAAAAAAAAABB	1
P0537A1-7	common_wheat	USA	EAST_winter	cultivar	AA	AA	AA	AA	AA	BB	AAAAAAAAAABB	1
P07290A1-12	common_wheat	USA	EAST_winter	cultivar	AA	AA	AA	AA	AA	BB	AAAAAAAAAABB	1
P07469A1-28	common_wheat	USA	EAST_winter	cultivar	AA	AA	AA	AA	AA	BB	AAAAAAAAAABB	1
P9346A1-2	common_wheat	USA	EAST_winter	cultivar	AA	AA	AA	AA	AA	BB	AAAAAAAAAABB	1
P99840C4-8	common_wheat	USA	EAST_winter	cultivar	AA	AA	AA	AA	AA	BB	AAAAAAAAAABB	1
PIONEER2548	common_wheat	USA	EAST_winter	cultivar	AA	AA	AA	AA	AA	BB	AAAAAAAAAABB	1
PIONEER2555	common_wheat	USA	EAST_winter	cultivar	AA	AA	AA	AA	AA	BB	AAAAAAAAAABB	1
PIONEER2580	common_wheat	USA	EAST_winter	cultivar	AA	AA	AA	AA	AA	BB	AAAAAAAAAABB	1	1
PIONEER25R47	common_wheat	USA	EAST_winter	cultivar	AA	AA	AA	AA	AA	BB	AAAAAAAAAABB	1
PIONEER2643	common_wheat	USA	EAST_winter	cultivar	AA	AA	AA	AA	AA	BB	AAAAAAAAAABB	1
PIONEER26R31	common_wheat	USA	EAST_winter	cultivar	AA	AA	AA	AA	AA	BB	AAAAAAAAAABB	1
PIONEER26R46	common_wheat	USA	EAST_winter	cultivar	AA	AA	AA	AA	AA	BB	AAAAAAAAAABB	1
POTOMAC	common_wheat	USA	EAST_winter	cultivar	AA	AA	AA	AA	AA	BB	AAAAAAAAAABB	1
REDCOAT	common_wheat	USA	EAST_winter	cultivar	AA	AA	AA	AA	AA	BB	AAAAAAAAAABB	1
REDMAY	common_wheat	USA	EAST_winter	cultivar	AA	AA	AA	AA	AA	BB	AAAAAAAAAABB	1
RL6077	common_wheat	USA	EAST_winter	cultivar	AA	AA	AA	AA	AA	BB	AAAAAAAAAABB	1
SALUDA	common_wheat	USA	EAST_winter	cultivar	AA	AA	AA	AA	AA	BB	AAAAAAAAAABB	1
SISSON	common_wheat	USA	EAST_winter	cultivar	AA	AA	AA	AA	AA	BB	AAAAAAAAAABB	1
SS520	common_wheat	USA	EAST_winter	cultivar	AA	AA	AA	AA	AA	BB	AAAAAAAAAABB	1
SS5205	common_wheat	USA	EAST_winter	cultivar	AA	AA	AA	AA	AA	BB	AAAAAAAAAABB	1
USG3209	common_wheat	USA	EAST_winter	cultivar	AA	AA	AA	AA	AA	BB	AAAAAAAAAABB	1
USG3295	common_wheat	USA	EAST_winter	cultivar	AA	AA	AA	AA	AA	BB	AAAAAAAAAABB	1
USG3592	common_wheat	USA	EAST_winter	cultivar	AA	AA	AA	AA	AA	BB	AAAAAAAAAABB	1
VA00W-38	common_wheat	USA	EAST_winter	cultivar	AA	AA	AA	AA	AA	BB	AAAAAAAAAABB	1
VA01W-21	common_wheat	USA	EAST_winter	cultivar	AA	AA	AA	AA	AA	BB	AAAAAAAAAABB	1
VA03W-211	common_wheat	USA	EAST_winter	cultivar	AA	AA	AA	AA	AA	BB	AAAAAAAAAABB	1
VA03W-235	common_wheat	USA	EAST_winter	cultivar	AA	AA	AA	AA	AA	BB	AAAAAAAAAABB	1
VA05W-139	common_wheat	USA	EAST_winter	cultivar	AA	AA	AA	AA	AA	BB	AAAAAAAAAABB	1
VA05W-151	common_wheat	USA	EAST_winter	cultivar	AA	AA	AA	AA	AA	BB	AAAAAAAAAABB	1
VA259	common_wheat	USA	EAST_winter	cultivar	AA	AA	AA	AA	AA	BB	AAAAAAAAAABB	1
VA90	common_wheat	USA	EAST_winter	cultivar	AA	AA	AA	AA	AA	BB	AAAAAAAAAABB	1
WHEELER	common_wheat	USA	EAST_winter	cultivar	AA	AA	AA	AA	AA	BB	AAAAAAAAAABB	1
69Z108.115	common_wheat	Austria	Europe_spring	cultivar	AA	AA	AA	AA	AA	BB	AAAAAAAAAABB	1	1
PI384028	common_wheat	Israel	Europe_spring	cultivar	AA	AA	AA	AA	AA	BB	AAAAAAAAAABB	1	1
PI520333	common_wheat	Pakistan	Europe_spring	cultivar	AA	AA	AA	AA	AA	BB	AAAAAAAAAABB	1	1
PI351735	common_wheat	Romania	Europe_spring	cultivar	AA	AA	AA	AA	AA	BB	AAAAAAAAAABB	1	1
PI519399	common_wheat	Turkey	Europe_spring	cultivar	AA	AA	AA	AA	AA	BB	AAAAAAAAAABB	1	1
AMADINA	common_wheat	Mexico	Mexico_spring	cultivar	AA	AA	AA	AA	AA	BB	AAAAAAAAAABB	1
ATTILA	common_wheat	Mexico	Mexico_spring	cultivar	AA	AA	AA	AA	AA	BB	AAAAAAAAAABB	1
CM1_1	common_wheat	Mexico	Mexico_spring	cultivar	AA	AA	AA	AA	AA	BB	AAAAAAAAAABB	1
CM1_10	common_wheat	Mexico	Mexico_spring	cultivar	AA	AA	AA	AA	AA	BB	AAAAAAAAAABB	1
CM1_11	common_wheat	Mexico	Mexico_spring	cultivar	AA	AA	AA	AA	AA	BB	AAAAAAAAAABB	1
CM1_13	common_wheat	Mexico	Mexico_spring	cultivar	AA	AA	AA	AA	AA	BB	AAAAAAAAAABB	1
CM1_14	common_wheat	Mexico	Mexico_spring	cultivar	AA	AA	AA	AA	AA	BB	AAAAAAAAAABB	1
CM1_15	common_wheat	Mexico	Mexico_spring	cultivar	AA	AA	AA	AA	AA	BB	AAAAAAAAAABB	1
CM1_18	common_wheat	Mexico	Mexico_spring	cultivar	AA	AA	AA	AA	AA	BB	AAAAAAAAAABB	1
CM1_2	common_wheat	Mexico	Mexico_spring	cultivar	AA	AA	AA	AA	AA	BB	AAAAAAAAAABB	1
CM1_20	common_wheat	Mexico	Mexico_spring	cultivar	AA	AA	AA	AA	AA	BB	AAAAAAAAAABB	1
CM1_21	common_wheat	Mexico	Mexico_spring	cultivar	AA	AA	AA	AA	AA	BB	AAAAAAAAAABB	1	1
CM1_23	common_wheat	Mexico	Mexico_spring	cultivar	AA	AA	AA	AA	AA	BB	AAAAAAAAAABB	1
CM1_24	common_wheat	Mexico	Mexico_spring	cultivar	AA	AA	AA	AA	AA	BB	AAAAAAAAAABB	1
CM1_26	common_wheat	Mexico	Mexico_spring	cultivar	AA	AA	AA	AA	AA	BB	AAAAAAAAAABB	1
CM1_27	common_wheat	Mexico	Mexico_spring	cultivar	AA	AA	AA	AA	AA	BB	AAAAAAAAAABB	1
CM1_29	common_wheat	Mexico	Mexico_spring	cultivar	AA	AA	AA	AA	AA	BB	AAAAAAAAAABB	1
CM1_3	common_wheat	Mexico	Mexico_spring	cultivar	AA	AA	AA	AA	AA	BB	AAAAAAAAAABB	1
CM1_31	common_wheat	Mexico	Mexico_spring	cultivar	AA	AA	AA	AA	AA	BB	AAAAAAAAAABB	1
CM1_32	common_wheat	Mexico	Mexico_spring	cultivar	AA	AA	AA	AA	AA	BB	AAAAAAAAAABB	1
CM1_34	common_wheat	Mexico	Mexico_spring	cultivar	AA	AA	AA	AA	AA	BB	AAAAAAAAAABB	1
CM1_35	common_wheat	Mexico	Mexico_spring	cultivar	AA	AA	AA	AA	AA	BB	AAAAAAAAAABB	1
CM1_36	common_wheat	Mexico	Mexico_spring	cultivar	AA	AA	AA	AA	AA	BB	AAAAAAAAAABB	1
CM1_39	common_wheat	Mexico	Mexico_spring	cultivar	AA	AA	AA	AA	AA	BB	AAAAAAAAAABB	1
CM1_4	common_wheat	Mexico	Mexico_spring	cultivar	AA	AA	AA	AA	AA	BB	AAAAAAAAAABB	1
CM1_40	common_wheat	Mexico	Mexico_spring	cultivar	AA	AA	AA	AA	AA	BB	AAAAAAAAAABB	1
CM1_41	common_wheat	Mexico	Mexico_spring	cultivar	AA	AA	AA	AA	AA	BB	AAAAAAAAAABB	1
CM1_42	common_wheat	Mexico	Mexico_spring	cultivar	AA	AA	AA	AA	AA	BB	AAAAAAAAAABB	1	1
CM1_43	common_wheat	Mexico	Mexico_spring	cultivar	AA	AA	AA	AA	AA	BB	AAAAAAAAAABB	1
CM1_45	common_wheat	Mexico	Mexico_spring	cultivar	AA	AA	AA	AA	AA	BB	AAAAAAAAAABB	1
CM1_46	common_wheat	Mexico	Mexico_spring	cultivar	AA	AA	AA	AA	AA	BB	AAAAAAAAAABB	1
CM1_47	common_wheat	Mexico	Mexico_spring	cultivar	AA	AA	AA	AA	AA	BB	AAAAAAAAAABB	1
CM1_49	common_wheat	Mexico	Mexico_spring	cultivar	AA	AA	AA	AA	AA	BB	AAAAAAAAAABB	1
CM1_5	common_wheat	Mexico	Mexico_spring	cultivar	AA	AA	AA	AA	AA	BB	AAAAAAAAAABB	1
CM1_50	common_wheat	Mexico	Mexico_spring	cultivar	AA	AA	AA	AA	AA	BB	AAAAAAAAAABB	1
CM1_51	common_wheat	Mexico	Mexico_spring	cultivar	AA	AA	AA	AA	AA	BB	AAAAAAAAAABB	1
CM1_54	common_wheat	Mexico	Mexico_spring	cultivar	AA	AA	AA	AA	AA	BB	AAAAAAAAAABB	1
CM1_55	common_wheat	Mexico	Mexico_spring	cultivar	AA	AA	AA	AA	AA	BB	AAAAAAAAAABB	1
CM1_56	common_wheat	Mexico	Mexico_spring	cultivar	AA	AA	AA	AA	AA	BB	AAAAAAAAAABB	1
CM1_57	common_wheat	Mexico	Mexico_spring	cultivar	AA	AA	AA	AA	AA	BB	AAAAAAAAAABB	1
CM1_59	common_wheat	Mexico	Mexico_spring	cultivar	AA	AA	AA	AA	AA	BB	AAAAAAAAAABB	1
CM1_6	common_wheat	Mexico	Mexico_spring	cultivar	AA	AA	AA	AA	AA	BB	AAAAAAAAAABB	1
CM1_60	common_wheat	Mexico	Mexico_spring	cultivar	AA	AA	AA	AA	AA	BB	AAAAAAAAAABB	1
CM1_61	common_wheat	Mexico	Mexico_spring	cultivar	AA	AA	AA	AA	AA	BB	AAAAAAAAAABB	1
CM1_63	common_wheat	Mexico	Mexico_spring	cultivar	AA	AA	AA	AA	AA	BB	AAAAAAAAAABB	1
CM1_64	common_wheat	Mexico	Mexico_spring	cultivar	AA	AA	AA	AA	AA	BB	AAAAAAAAAABB	1
CM1_68	common_wheat	Mexico	Mexico_spring	cultivar	AA	AA	AA	AA	AA	BB	AAAAAAAAAABB	1
CM1_69	common_wheat	Mexico	Mexico_spring	cultivar	AA	AA	AA	AA	AA	BB	AAAAAAAAAABB	1
CM1_72	common_wheat	Mexico	Mexico_spring	cultivar	AA	AA	AA	AA	AA	BB	AAAAAAAAAABB	1	1
CM1_73	common_wheat	Mexico	Mexico_spring	cultivar	AA	AA	AA	AA	AA	BB	AAAAAAAAAABB	1
CM1_74	common_wheat	Mexico	Mexico_spring	cultivar	AA	AA	AA	AA	AA	BB	AAAAAAAAAABB	1
CM1_76	common_wheat	Mexico	Mexico_spring	cultivar	AA	AA	AA	AA	AA	BB	AAAAAAAAAABB	1
CM1_78	common_wheat	Mexico	Mexico_spring	cultivar	AA	AA	AA	AA	AA	BB	AAAAAAAAAABB	1
CM1_79	common_wheat	Mexico	Mexico_spring	cultivar	AA	AA	AA	AA	AA	BB	AAAAAAAAAABB	1
CM1_8	common_wheat	Mexico	Mexico_spring	cultivar	AA	AA	AA	AA	AA	BB	AAAAAAAAAABB	1
CM1_80	common_wheat	Mexico	Mexico_spring	cultivar	AA	AA	AA	AA	AA	BB	AAAAAAAAAABB	1
CM1_81	common_wheat	Mexico	Mexico_spring	cultivar	AA	AA	AA	AA	AA	BB	AAAAAAAAAABB	1
CM1_82	common_wheat	Mexico	Mexico_spring	cultivar	AA	AA	AA	AA	AA	BB	AAAAAAAAAABB	1
CM1_83	common_wheat	Mexico	Mexico_spring	cultivar	AA	AA	AA	AA	AA	BB	AAAAAAAAAABB	1
CM1_87	common_wheat	Mexico	Mexico_spring	cultivar	AA	AA	AA	AA	AA	BB	AAAAAAAAAABB	1
CM1_88	common_wheat	Mexico	Mexico_spring	cultivar	AA	AA	AA	AA	AA	BB	AAAAAAAAAABB	1
CM1_90	common_wheat	Mexico	Mexico_spring	cultivar	AA	AA	AA	AA	AA	BB	AAAAAAAAAABB	1
CM1_91	common_wheat	Mexico	Mexico_spring	cultivar	AA	AA	AA	AA	AA	BB	AAAAAAAAAABB	1
CM1_92	common_wheat	Mexico	Mexico_spring	cultivar	AA	AA	AA	AA	AA	BB	AAAAAAAAAABB	1
CM1_94	common_wheat	Mexico	Mexico_spring	cultivar	AA	AA	AA	AA	AA	BB	AAAAAAAAAABB	1
CM2_1	common_wheat	Mexico	Mexico_spring	cultivar	AA	AA	AA	AA	AA	BB	AAAAAAAAAABB	1
CM2_10	common_wheat	Mexico	Mexico_spring	cultivar	AA	AA	AA	AA	AA	BB	AAAAAAAAAABB	1
CM2_11	common_wheat	Mexico	Mexico_spring	cultivar	AA	AA	AA	AA	AA	BB	AAAAAAAAAABB	1
CM2_12	common_wheat	Mexico	Mexico_spring	cultivar	AA	AA	AA	AA	AA	BB	AAAAAAAAAABB	1
CM2_13	common_wheat	Mexico	Mexico_spring	cultivar	AA	AA	AA	AA	AA	BB	AAAAAAAAAABB	1	1
CM2_14	common_wheat	Mexico	Mexico_spring	cultivar	AA	AA	AA	AA	AA	BB	AAAAAAAAAABB	1
CM2_15	common_wheat	Mexico	Mexico_spring	cultivar	AA	AA	AA	AA	AA	BB	AAAAAAAAAABB	1
CM2_16	common_wheat	Mexico	Mexico_spring	cultivar	AA	AA	AA	AA	AA	BB	AAAAAAAAAABB	1
CM2_17	common_wheat	Mexico	Mexico_spring	cultivar	AA	AA	AA	AA	AA	BB	AAAAAAAAAABB	1
CM2_18	common_wheat	Mexico	Mexico_spring	cultivar	AA	AA	AA	AA	AA	BB	AAAAAAAAAABB	1
CM2_19	common_wheat	Mexico	Mexico_spring	cultivar	AA	AA	AA	AA	AA	BB	AAAAAAAAAABB	1
CM2_2	common_wheat	Mexico	Mexico_spring	cultivar	AA	AA	AA	AA	AA	BB	AAAAAAAAAABB	1
CM2_20	common_wheat	Mexico	Mexico_spring	cultivar	AA	AA	AA	AA	AA	BB	AAAAAAAAAABB	1
CM2_21	common_wheat	Mexico	Mexico_spring	cultivar	AA	AA	AA	AA	AA	BB	AAAAAAAAAABB	1
CM2_23	common_wheat	Mexico	Mexico_spring	cultivar	AA	AA	AA	AA	AA	BB	AAAAAAAAAABB	1
CM2_24	common_wheat	Mexico	Mexico_spring	cultivar	AA	AA	AA	AA	AA	BB	AAAAAAAAAABB	1
CM2_26	common_wheat	Mexico	Mexico_spring	cultivar	AA	AA	AA	AA	AA	BB	AAAAAAAAAABB	1
CM2_29	common_wheat	Mexico	Mexico_spring	cultivar	AA	AA	AA	AA	AA	BB	AAAAAAAAAABB	1
CM2_3	common_wheat	Mexico	Mexico_spring	cultivar	AA	AA	AA	AA	AA	BB	AAAAAAAAAABB	1
CM2_32	common_wheat	Mexico	Mexico_spring	cultivar	AA	AA	AA	AA	AA	BB	AAAAAAAAAABB	1
CM2_34	common_wheat	Mexico	Mexico_spring	cultivar	AA	AA	AA	AA	AA	BB	AAAAAAAAAABB	1
CM2_36	common_wheat	Mexico	Mexico_spring	cultivar	AA	AA	AA	AA	AA	BB	AAAAAAAAAABB	1
CM2_37	common_wheat	Mexico	Mexico_spring	cultivar	AA	AA	AA	AA	AA	BB	AAAAAAAAAABB	1
CM2_39	common_wheat	Mexico	Mexico_spring	cultivar	AA	AA	AA	AA	AA	BB	AAAAAAAAAABB	1
CM2_4	common_wheat	Mexico	Mexico_spring	cultivar	AA	AA	AA	AA	AA	BB	AAAAAAAAAABB	1	1
CM2_40	common_wheat	Mexico	Mexico_spring	cultivar	AA	AA	AA	AA	AA	BB	AAAAAAAAAABB	1
CM2_41	common_wheat	Mexico	Mexico_spring	cultivar	AA	AA	AA	AA	AA	BB	AAAAAAAAAABB	1
CM2_42	common_wheat	Mexico	Mexico_spring	cultivar	AA	AA	AA	AA	AA	BB	AAAAAAAAAABB	1
CM2_43	common_wheat	Mexico	Mexico_spring	cultivar	AA	AA	AA	AA	AA	BB	AAAAAAAAAABB	1
CM2_46	common_wheat	Mexico	Mexico_spring	cultivar	AA	AA	AA	AA	AA	BB	AAAAAAAAAABB	1
CM2_47	common_wheat	Mexico	Mexico_spring	cultivar	AA	AA	AA	AA	AA	BB	AAAAAAAAAABB	1
CM2_5	common_wheat	Mexico	Mexico_spring	cultivar	AA	AA	AA	AA	AA	BB	AAAAAAAAAABB	1
CM2_50	common_wheat	Mexico	Mexico_spring	cultivar	AA	AA	AA	AA	AA	BB	AAAAAAAAAABB	1
CM2_51	common_wheat	Mexico	Mexico_spring	cultivar	AA	AA	AA	AA	AA	BB	AAAAAAAAAABB	1
CM2_52	common_wheat	Mexico	Mexico_spring	cultivar	AA	AA	AA	AA	AA	BB	AAAAAAAAAABB	1
CM2_55	common_wheat	Mexico	Mexico_spring	cultivar	AA	AA	AA	AA	AA	BB	AAAAAAAAAABB	1
CM2_57	common_wheat	Mexico	Mexico_spring	cultivar	AA	AA	AA	AA	AA	BB	AAAAAAAAAABB	1
CM2_58	common_wheat	Mexico	Mexico_spring	cultivar	AA	AA	AA	AA	AA	BB	AAAAAAAAAABB	1
CM2_59	common_wheat	Mexico	Mexico_spring	cultivar	AA	AA	AA	AA	AA	BB	AAAAAAAAAABB	1
CM2_60	common_wheat	Mexico	Mexico_spring	cultivar	AA	AA	AA	AA	AA	BB	AAAAAAAAAABB	1
CM2_61	common_wheat	Mexico	Mexico_spring	cultivar	AA	AA	AA	AA	AA	BB	AAAAAAAAAABB	1
CM2_63	common_wheat	Mexico	Mexico_spring	cultivar	AA	AA	AA	AA	AA	BB	AAAAAAAAAABB	1
CM2_65	common_wheat	Mexico	Mexico_spring	cultivar	AA	AA	AA	AA	AA	BB	AAAAAAAAAABB	1
CM2_66	common_wheat	Mexico	Mexico_spring	cultivar	AA	AA	AA	AA	AA	BB	AAAAAAAAAABB	1
CM2_67	common_wheat	Mexico	Mexico_spring	cultivar	AA	AA	AA	AA	AA	BB	AAAAAAAAAABB	1
CM2_69	common_wheat	Mexico	Mexico_spring	cultivar	AA	AA	AA	AA	AA	BB	AAAAAAAAAABB	1
CM2_7	common_wheat	Mexico	Mexico_spring	cultivar	AA	AA	AA	AA	AA	BB	AAAAAAAAAABB	1
CM2_72	common_wheat	Mexico	Mexico_spring	cultivar	AA	AA	AA	AA	AA	BB	AAAAAAAAAABB	1
CM2_73	common_wheat	Mexico	Mexico_spring	cultivar	AA	AA	AA	AA	AA	BB	AAAAAAAAAABB	1
CM2_75	common_wheat	Mexico	Mexico_spring	cultivar	AA	AA	AA	AA	AA	BB	AAAAAAAAAABB	1
CM2_76	common_wheat	Mexico	Mexico_spring	cultivar	AA	AA	AA	AA	AA	BB	AAAAAAAAAABB	1
CM2_77	common_wheat	Mexico	Mexico_spring	cultivar	AA	AA	AA	AA	AA	BB	AAAAAAAAAABB	1
CM2_8	common_wheat	Mexico	Mexico_spring	cultivar	AA	AA	AA	AA	AA	BB	AAAAAAAAAABB	1
CM2_80	common_wheat	Mexico	Mexico_spring	cultivar	AA	AA	AA	AA	AA	BB	AAAAAAAAAABB	1
CM2_81	common_wheat	Mexico	Mexico_spring	cultivar	AA	AA	AA	AA	AA	BB	AAAAAAAAAABB	1
CM2_82	common_wheat	Mexico	Mexico_spring	cultivar	AA	AA	AA	AA	AA	BB	AAAAAAAAAABB	1
CM2_84	common_wheat	Mexico	Mexico_spring	cultivar	AA	AA	AA	AA	AA	BB	AAAAAAAAAABB	1
CM2_85	common_wheat	Mexico	Mexico_spring	cultivar	AA	AA	AA	AA	AA	BB	AAAAAAAAAABB	1
CM2_86	common_wheat	Mexico	Mexico_spring	cultivar	AA	AA	AA	AA	AA	BB	AAAAAAAAAABB	1
CM2_88	common_wheat	Mexico	Mexico_spring	cultivar	AA	AA	AA	AA	AA	BB	AAAAAAAAAABB	1
CM2_89	common_wheat	Mexico	Mexico_spring	cultivar	AA	AA	AA	AA	AA	BB	AAAAAAAAAABB	1
CM2_9	common_wheat	Mexico	Mexico_spring	cultivar	AA	AA	AA	AA	AA	BB	AAAAAAAAAABB	1
CM2_90	common_wheat	Mexico	Mexico_spring	cultivar	AA	AA	AA	AA	AA	BB	AAAAAAAAAABB	1
CM2_91	common_wheat	Mexico	Mexico_spring	cultivar	AA	AA	AA	AA	AA	BB	AAAAAAAAAABB	1	1
CM2_92	common_wheat	Mexico	Mexico_spring	cultivar	AA	AA	AA	AA	AA	BB	AAAAAAAAAABB	1
CM2_93	common_wheat	Mexico	Mexico_spring	cultivar	AA	AA	AA	AA	AA	BB	AAAAAAAAAABB	1
CM3_1	common_wheat	Mexico	Mexico_spring	cultivar	AA	AA	AA	AA	AA	BB	AAAAAAAAAABB	1
CM3_10	common_wheat	Mexico	Mexico_spring	cultivar	AA	AA	AA	AA	AA	BB	AAAAAAAAAABB	1
CM3_11	common_wheat	Mexico	Mexico_spring	cultivar	AA	AA	AA	AA	AA	BB	AAAAAAAAAABB	1
CM3_14	common_wheat	Mexico	Mexico_spring	cultivar	AA	AA	AA	AA	AA	BB	AAAAAAAAAABB	1
CM3_15	common_wheat	Mexico	Mexico_spring	cultivar	AA	AA	AA	AA	AA	BB	AAAAAAAAAABB	1
CM3_16	common_wheat	Mexico	Mexico_spring	cultivar	AA	AA	AA	AA	AA	BB	AAAAAAAAAABB	1
CM3_17	common_wheat	Mexico	Mexico_spring	cultivar	AA	AA	AA	AA	AA	BB	AAAAAAAAAABB	1
CM3_18	common_wheat	Mexico	Mexico_spring	cultivar	AA	AA	AA	AA	AA	BB	AAAAAAAAAABB	1
CM3_19	common_wheat	Mexico	Mexico_spring	cultivar	AA	AA	AA	AA	AA	BB	AAAAAAAAAABB	1
CM3_2	common_wheat	Mexico	Mexico_spring	cultivar	AA	AA	AA	AA	AA	BB	AAAAAAAAAABB	1
CM3_20	common_wheat	Mexico	Mexico_spring	cultivar	AA	AA	AA	AA	AA	BB	AAAAAAAAAABB	1
CM3_21	common_wheat	Mexico	Mexico_spring	cultivar	AA	AA	AA	AA	AA	BB	AAAAAAAAAABB	1
CM3_22	common_wheat	Mexico	Mexico_spring	cultivar	AA	AA	AA	AA	AA	BB	AAAAAAAAAABB	1
CM3_24	common_wheat	Mexico	Mexico_spring	cultivar	AA	AA	AA	AA	AA	BB	AAAAAAAAAABB	1
CM3_26	common_wheat	Mexico	Mexico_spring	cultivar	AA	AA	AA	AA	AA	BB	AAAAAAAAAABB	1
CM3_27	common_wheat	Mexico	Mexico_spring	cultivar	AA	AA	AA	AA	AA	BB	AAAAAAAAAABB	1
CM3_28	common_wheat	Mexico	Mexico_spring	cultivar	AA	AA	AA	AA	AA	BB	AAAAAAAAAABB	1
CM3_29	common_wheat	Mexico	Mexico_spring	cultivar	AA	AA	AA	AA	AA	BB	AAAAAAAAAABB	1
CM3_3	common_wheat	Mexico	Mexico_spring	cultivar	AA	AA	AA	AA	AA	BB	AAAAAAAAAABB	1
CM3_30	common_wheat	Mexico	Mexico_spring	cultivar	AA	AA	AA	AA	AA	BB	AAAAAAAAAABB	1
CM3_31	common_wheat	Mexico	Mexico_spring	cultivar	AA	AA	AA	AA	AA	BB	AAAAAAAAAABB	1
CM3_32	common_wheat	Mexico	Mexico_spring	cultivar	AA	AA	AA	AA	AA	BB	AAAAAAAAAABB	1
CM3_33	common_wheat	Mexico	Mexico_spring	cultivar	AA	AA	AA	AA	AA	BB	AAAAAAAAAABB	1
CM3_34	common_wheat	Mexico	Mexico_spring	cultivar	AA	AA	AA	AA	AA	BB	AAAAAAAAAABB	1
CM3_35	common_wheat	Mexico	Mexico_spring	cultivar	AA	AA	AA	AA	AA	BB	AAAAAAAAAABB	1
CM3_36	common_wheat	Mexico	Mexico_spring	cultivar	AA	AA	AA	AA	AA	BB	AAAAAAAAAABB	1
CM3_38	common_wheat	Mexico	Mexico_spring	cultivar	AA	AA	AA	AA	AA	BB	AAAAAAAAAABB	1
CM3_39	common_wheat	Mexico	Mexico_spring	cultivar	AA	AA	AA	AA	AA	BB	AAAAAAAAAABB	1
CM3_4	common_wheat	Mexico	Mexico_spring	cultivar	AA	AA	AA	AA	AA	BB	AAAAAAAAAABB	1
CM3_40	common_wheat	Mexico	Mexico_spring	cultivar	AA	AA	AA	AA	AA	BB	AAAAAAAAAABB	1
CM3_41	common_wheat	Mexico	Mexico_spring	cultivar	AA	AA	AA	AA	AA	BB	AAAAAAAAAABB	1
CM3_42	common_wheat	Mexico	Mexico_spring	cultivar	AA	AA	AA	AA	AA	BB	AAAAAAAAAABB	1
CM3_43	common_wheat	Mexico	Mexico_spring	cultivar	AA	AA	AA	AA	AA	BB	AAAAAAAAAABB	1
CM3_44	common_wheat	Mexico	Mexico_spring	cultivar	AA	AA	AA	AA	AA	BB	AAAAAAAAAABB	1
CM3_45	common_wheat	Mexico	Mexico_spring	cultivar	AA	AA	AA	AA	AA	BB	AAAAAAAAAABB	1
CM3_46	common_wheat	Mexico	Mexico_spring	cultivar	AA	AA	AA	AA	AA	BB	AAAAAAAAAABB	1
CM3_47	common_wheat	Mexico	Mexico_spring	cultivar	AA	AA	AA	AA	AA	BB	AAAAAAAAAABB	1
CM3_48	common_wheat	Mexico	Mexico_spring	cultivar	AA	AA	AA	AA	AA	BB	AAAAAAAAAABB	1
CM3_49	common_wheat	Mexico	Mexico_spring	cultivar	AA	AA	AA	AA	AA	BB	AAAAAAAAAABB	1
CM3_50	common_wheat	Mexico	Mexico_spring	cultivar	AA	AA	AA	AA	AA	BB	AAAAAAAAAABB	1
CM3_51	common_wheat	Mexico	Mexico_spring	cultivar	AA	AA	AA	AA	AA	BB	AAAAAAAAAABB	1
CM3_52	common_wheat	Mexico	Mexico_spring	cultivar	AA	AA	AA	AA	AA	BB	AAAAAAAAAABB	1
CM3_53	common_wheat	Mexico	Mexico_spring	cultivar	AA	AA	AA	AA	AA	BB	AAAAAAAAAABB	1
CM3_54	common_wheat	Mexico	Mexico_spring	cultivar	AA	AA	AA	AA	AA	BB	AAAAAAAAAABB	1
CM3_55	common_wheat	Mexico	Mexico_spring	cultivar	AA	AA	AA	AA	AA	BB	AAAAAAAAAABB	1
CM3_56	common_wheat	Mexico	Mexico_spring	cultivar	AA	AA	AA	AA	AA	BB	AAAAAAAAAABB	1
CM3_59	common_wheat	Mexico	Mexico_spring	cultivar	AA	AA	AA	AA	AA	BB	AAAAAAAAAABB	1
CM3_60	common_wheat	Mexico	Mexico_spring	cultivar	AA	AA	AA	AA	AA	BB	AAAAAAAAAABB	1
CM3_61	common_wheat	Mexico	Mexico_spring	cultivar	AA	AA	AA	AA	AA	BB	AAAAAAAAAABB	1
CM3_63	common_wheat	Mexico	Mexico_spring	cultivar	AA	AA	AA	AA	AA	BB	AAAAAAAAAABB	1
CM3_64	common_wheat	Mexico	Mexico_spring	cultivar	AA	AA	AA	AA	AA	BB	AAAAAAAAAABB	1
CM3_65	common_wheat	Mexico	Mexico_spring	cultivar	AA	AA	AA	AA	AA	BB	AAAAAAAAAABB	1
CM3_66	common_wheat	Mexico	Mexico_spring	cultivar	AA	AA	AA	AA	AA	BB	AAAAAAAAAABB	1
CM3_67	common_wheat	Mexico	Mexico_spring	cultivar	AA	AA	AA	AA	AA	BB	AAAAAAAAAABB	1
CM3_68	common_wheat	Mexico	Mexico_spring	cultivar	AA	AA	AA	AA	AA	BB	AAAAAAAAAABB	1
CM3_7	common_wheat	Mexico	Mexico_spring	cultivar	AA	AA	AA	AA	AA	BB	AAAAAAAAAABB	1
CM3_70	common_wheat	Mexico	Mexico_spring	cultivar	AA	AA	AA	AA	AA	BB	AAAAAAAAAABB	1
CM3_71	common_wheat	Mexico	Mexico_spring	cultivar	AA	AA	AA	AA	AA	BB	AAAAAAAAAABB	1
CM3_72	common_wheat	Mexico	Mexico_spring	cultivar	AA	AA	AA	AA	AA	BB	AAAAAAAAAABB	1
CM3_73	common_wheat	Mexico	Mexico_spring	cultivar	AA	AA	AA	AA	AA	BB	AAAAAAAAAABB	1
CM3_74	common_wheat	Mexico	Mexico_spring	cultivar	AA	AA	AA	AA	AA	BB	AAAAAAAAAABB	1
CM3_75	common_wheat	Mexico	Mexico_spring	cultivar	AA	AA	AA	AA	AA	BB	AAAAAAAAAABB	1
CM3_76	common_wheat	Mexico	Mexico_spring	cultivar	AA	AA	AA	AA	AA	BB	AAAAAAAAAABB	1
CM3_77	common_wheat	Mexico	Mexico_spring	cultivar	AA	AA	AA	AA	AA	BB	AAAAAAAAAABB	1
CM3_78	common_wheat	Mexico	Mexico_spring	cultivar	AA	AA	AA	AA	AA	BB	AAAAAAAAAABB	1
CM3_79	common_wheat	Mexico	Mexico_spring	cultivar	AA	AA	AA	AA	AA	BB	AAAAAAAAAABB	1
CM3_80	common_wheat	Mexico	Mexico_spring	cultivar	AA	AA	AA	AA	AA	BB	AAAAAAAAAABB	1
CM3_81	common_wheat	Mexico	Mexico_spring	cultivar	AA	AA	AA	AA	AA	BB	AAAAAAAAAABB	1
CM3_82	common_wheat	Mexico	Mexico_spring	cultivar	AA	AA	AA	AA	AA	BB	AAAAAAAAAABB	1
CM3_83	common_wheat	Mexico	Mexico_spring	cultivar	AA	AA	AA	AA	AA	BB	AAAAAAAAAABB	1
CM3_84	common_wheat	Mexico	Mexico_spring	cultivar	AA	AA	AA	AA	AA	BB	AAAAAAAAAABB	1
CM3_85	common_wheat	Mexico	Mexico_spring	cultivar	AA	AA	AA	AA	AA	BB	AAAAAAAAAABB	1
CM3_86	common_wheat	Mexico	Mexico_spring	cultivar	AA	AA	AA	AA	AA	BB	AAAAAAAAAABB	1
CM3_87	common_wheat	Mexico	Mexico_spring	cultivar	AA	AA	AA	AA	AA	BB	AAAAAAAAAABB	1
CM3_88	common_wheat	Mexico	Mexico_spring	cultivar	AA	AA	AA	AA	AA	BB	AAAAAAAAAABB	1
CM3_89	common_wheat	Mexico	Mexico_spring	cultivar	AA	AA	AA	AA	AA	BB	AAAAAAAAAABB	1
CM3_9	common_wheat	Mexico	Mexico_spring	cultivar	AA	AA	AA	AA	AA	BB	AAAAAAAAAABB	1
CM3_90	common_wheat	Mexico	Mexico_spring	cultivar	AA	AA	AA	AA	AA	BB	AAAAAAAAAABB	1
CM3_91	common_wheat	Mexico	Mexico_spring	cultivar	AA	AA	AA	AA	AA	BB	AAAAAAAAAABB	1
CM3_92	common_wheat	Mexico	Mexico_spring	cultivar	AA	AA	AA	AA	AA	BB	AAAAAAAAAABB	1
CM3_93	common_wheat	Mexico	Mexico_spring	cultivar	AA	AA	AA	AA	AA	BB	AAAAAAAAAABB	1
CM3_94	common_wheat	Mexico	Mexico_spring	cultivar	AA	AA	AA	AA	AA	BB	AAAAAAAAAABB	1
CM4_283	common_wheat	Mexico	Mexico_spring	cultivar	AA	AA	AA	AA	AA	BB	AAAAAAAAAABB	1
CM4_286	common_wheat	Mexico	Mexico_spring	cultivar	AA	AA	AA	AA	AA	BB	AAAAAAAAAABB	1
CM4_290	common_wheat	Mexico	Mexico_spring	cultivar	AA	AA	AA	AA	AA	BB	AAAAAAAAAABB	1
CM4_294	common_wheat	Mexico	Mexico_spring	cultivar	AA	AA	AA	AA	AA	BB	AAAAAAAAAABB	1
GENARO	common_wheat	Mexico	Mexico_spring	cultivar	AA	AA	AA	AA	AA	BB	AAAAAAAAAABB	1
HIDHAB	common_wheat	Mexico	Mexico_spring	cultivar	AA	AA	AA	AA	AA	BB	AAAAAAAAAABB	1
NAVOJOA	common_wheat	Mexico	Mexico_spring	cultivar	AA	AA	AA	AA	AA	BB	AAAAAAAAAABB	1
OPATA	common_wheat	Mexico	Mexico_spring	cultivar	AA	AA	AA	AA	AA	BB	AAAAAAAAAABB	1
SERI82	common_wheat	Mexico	Mexico_spring	cultivar	AA	AA	AA	AA	AA	BB	AAAAAAAAAABB	1
VOROBEY	common_wheat	Mexico	Mexico_spring	cultivar	AA	AA	AA	AA	AA	BB	AAAAAAAAAABB	1
WEEBILL1	common_wheat	Mexico	Mexico_spring	cultivar	AA	AA	AA	AA	AA	BB	AAAAAAAAAABB	1
YECORA_ROJO	common_wheat	Mexico	Mexico_spring	cultivar	AA	AA	AA	AA	AA	BB	AAAAAAAAAABB	1
2145	common_wheat	USA	MIDWEST_winter	cultivar	AA	AA	AA	AA	AA	BB	AAAAAAAAAABB	1
AGS2000	common_wheat	USA	MIDWEST_winter	cultivar	AA	AA	AA	AA	AA	BB	AAAAAAAAAABB	1
ALLIANCE	common_wheat	USA	MIDWEST_winter	cultivar	AA	AA	AA	AA	AA	BB	AAAAAAAAAABB	1
ANTELOPE	common_wheat	USA	MIDWEST_winter	cultivar	AA	AA	AA	AA	AA	BB	AAAAAAAAAABB	1
AP05T2413	common_wheat	USA	MIDWEST_winter	cultivar	AA	AA	AA	AA	AA	BB	AAAAAAAAAABB	1
AR96077-7-2	common_wheat	USA	MIDWEST_winter	cultivar	AA	AA	AA	AA	AA	BB	AAAAAAAAAABB	1	1
AR97124-4-3	common_wheat	USA	MIDWEST_winter	cultivar	AA	AA	AA	AA	AA	BB	AAAAAAAAAABB	1
ARMOUR	common_wheat	USA	MIDWEST_winter	cultivar	AA	AA	AA	AA	AA	BB	AAAAAAAAAABB	1
ATLAS66	common_wheat	USA	MIDWEST_winter	cultivar	AA	AA	AA	AA	AA	BB	AAAAAAAAAABB	1
BISON	common_wheat	USA	MIDWEST_winter	cultivar	AA	AA	AA	AA	AA	BB	AAAAAAAAAABB	1
BRANSON	common_wheat	USA	MIDWEST_winter	cultivar	AA	AA	AA	AA	AA	BB	AAAAAAAAAABB	1
CA9W06-788	common_wheat	USA	MIDWEST_winter	cultivar	AA	AA	AA	AA	AA	BB	AAAAAAAAAABB	1
CAMELOT	common_wheat	USA	MIDWEST_winter	cultivar	AA	AA	AA	AA	AA	BB	AAAAAAAAAABB	1
CENTURK78	common_wheat	USA	MIDWEST_winter	cultivar	AA	AA	AA	AA	AA	BB	AAAAAAAAAABB	1
CHEYENNE	common_wheat	USA	MIDWEST_winter	cultivar	AA	AA	AA	AA	AA	BB	AAAAAAAAAABB	1
CO02W237	common_wheat	USA	MIDWEST_winter	cultivar	AA	AA	AA	AA	AA	BB	AAAAAAAAAABB	1
CO03064	common_wheat	USA	MIDWEST_winter	cultivar	AA	AA	AA	AA	AA	BB	AAAAAAAAAABB	1
CO03W043	common_wheat	USA	MIDWEST_winter	cultivar	AA	AA	AA	AA	AA	BB	AAAAAAAAAABB	1
CO03W054	common_wheat	USA	MIDWEST_winter	cultivar	AA	AA	AA	AA	AA	BB	AAAAAAAAAABB	1
CO03W139	common_wheat	USA	MIDWEST_winter	cultivar	AA	AA	AA	AA	AA	BB	AAAAAAAAAABB	1
CO04393	common_wheat	USA	MIDWEST_winter	cultivar	AA	AA	AA	AA	AA	BB	AAAAAAAAAABB	1
CO04499	common_wheat	USA	MIDWEST_winter	cultivar	AA	AA	AA	AA	AA	BB	AAAAAAAAAABB	1
CO04W210	common_wheat	USA	MIDWEST_winter	cultivar	AA	AA	AA	AA	AA	BB	AAAAAAAAAABB	1
COLORBEN4	common_wheat	USA	MIDWEST_winter	cultivar	AA	AA	AA	AA	AA	BB	AAAAAAAAAABB	1
COMANCHE	common_wheat	USA	MIDWEST_winter	cultivar	AA	AA	AA	AA	AA	BB	AAAAAAAAAABB	1
D04*5513	common_wheat	USA	MIDWEST_winter	cultivar	AA	AA	AA	AA	AA	BB	AAAAAAAAAABB	1
D04-5012	common_wheat	USA	MIDWEST_winter	cultivar	AA	AA	AA	AA	AA	BB	AAAAAAAAAABB	1
DANBY	common_wheat	USA	MIDWEST_winter	cultivar	AA	AA	AA	AA	AA	BB	AAAAAAAAAABB	1
DENALI	common_wheat	USA	MIDWEST_winter	cultivar	AA	AA	AA	AA	AA	BB	AAAAAAAAAABB	1
EAGLE	common_wheat	USA	MIDWEST_winter	cultivar	AA	AA	AA	AA	AA	BB	AAAAAAAAAABB	1
ERNIE	common_wheat	USA	MIDWEST_winter	cultivar	AA	AA	AA	AA	AA	BB	AAAAAAAAAABB	1
G59160	common_wheat	USA	MIDWEST_winter	cultivar	AA	AA	AA	AA	AA	BB	AAAAAAAAAABB	1
G61505	common_wheat	USA	MIDWEST_winter	cultivar	AA	AA	AA	AA	AA	BB	AAAAAAAAAABB	1
GOLDENSPIKESJ	common_wheat	USA	MIDWEST_winter	cultivar	AA	AA	AA	AA	AA	BB	AAAAAAAAAABB	1	1
GOODSTEAK	common_wheat	USA	MIDWEST_winter	cultivar	AA	AA	AA	AA	AA	BB	AAAAAAAAAABB	1
HEYNE	common_wheat	USA	MIDWEST_winter	cultivar	AA	AA	AA	AA	AA	BB	AAAAAAAAAABB	1
HV9W03-539R	common_wheat	USA	MIDWEST_winter	cultivar	AA	AA	AA	AA	AA	BB	AAAAAAAAAABB	1
HV9W04-1594R	common_wheat	USA	MIDWEST_winter	cultivar	AA	AA	AA	AA	AA	BB	AAAAAAAAAABB	1
HV9W05-1125R	common_wheat	USA	MIDWEST_winter	cultivar	AA	AA	AA	AA	AA	BB	AAAAAAAAAABB	1
HV9W05-881R	common_wheat	USA	MIDWEST_winter	cultivar	AA	AA	AA	AA	AA	BB	AAAAAAAAAABB	1
HV9W06-262	common_wheat	USA	MIDWEST_winter	cultivar	AA	AA	AA	AA	AA	BB	AAAAAAAAAABB	1
HV9W96-1271R-1	common_wheat	USA	MIDWEST_winter	cultivar	AA	AA	AA	AA	AA	BB	AAAAAAAAAABB	1
IKE	common_wheat	USA	MIDWEST_winter	cultivar	AA	AA	AA	AA	AA	BB	AAAAAAAAAABB	1
INDIAEXP.	common_wheat	USA	MIDWEST_winter	cultivar	AA	AA	AA	AA	AA	BB	AAAAAAAAAABB	1
INFINITY_CL	common_wheat	USA	MIDWEST_winter	cultivar	AA	AA	AA	AA	AA	BB	AAAAAAAAAABB	1
JACKPOT	common_wheat	USA	MIDWEST_winter	cultivar	AA	AA	AA	AA	AA	BB	AAAAAAAAAABB	1
JAGALENE	common_wheat	USA	MIDWEST_winter	cultivar	AA	AA	AA	AA	AA	BB	AAAAAAAAAABB	1
JINMAI-DR2	common_wheat	USA	MIDWEST_winter	cultivar	AA	AA	AA	AA	AA	BB	AAAAAAAAAABB	1
KARL_92	common_wheat	USA	MIDWEST_winter	cultivar	AA	AA	AA	AA	AA	BB	AAAAAAAAAABB	1
KAW61	common_wheat	USA	MIDWEST_winter	cultivar	AA	AA	AA	AA	AA	BB	AAAAAAAAAABB	1
KEOTA	common_wheat	USA	MIDWEST_winter	cultivar	AA	AA	AA	AA	AA	BB	AAAAAAAAAABB	1
KHARKOF	common_wheat	USA	MIDWEST_winter	cultivar	AA	AA	AA	AA	AA	BB	AAAAAAAAAABB	1
KIOWA	common_wheat	USA	MIDWEST_winter	cultivar	AA	AA	AA	AA	AA	BB	AAAAAAAAAABB	1
KIRWIN	common_wheat	USA	MIDWEST_winter	cultivar	AA	AA	AA	AA	AA	BB	AAAAAAAAAABB	1
KS010143K-11	common_wheat	USA	MIDWEST_winter	cultivar	AA	AA	AA	AA	AA	BB	AAAAAAAAAABB	1
KS010379M-2	common_wheat	USA	MIDWEST_winter	cultivar	AA	AA	AA	AA	AA	BB	AAAAAAAAAABB	1
KS010514-9TM-10	common_wheat	USA	MIDWEST_winter	cultivar	AA	AA	AA	AA	AA	BB	AAAAAAAAAABB	1
KS020648-M-6	common_wheat	USA	MIDWEST_winter	cultivar	AA	AA	AA	AA	AA	BB	AAAAAAAAAABB	1
KS020822-M-5	common_wheat	USA	MIDWEST_winter	cultivar	AA	AA	AA	AA	AA	BB	AAAAAAAAAABB	1
KS020947-K-13	common_wheat	USA	MIDWEST_winter	cultivar	AA	AA	AA	AA	AA	BB	AAAAAAAAAABB	1
KS030124-K-4	common_wheat	USA	MIDWEST_winter	cultivar	AA	AA	AA	AA	AA	BB	AAAAAAAAAABB	1
KS05HW121-2	common_wheat	USA	MIDWEST_winter	cultivar	AA	AA	AA	AA	AA	BB	AAAAAAAAAABB	1
KS05HW136-3	common_wheat	USA	MIDWEST_winter	cultivar	AA	AA	AA	AA	AA	BB	AAAAAAAAAABB	1
KS05HW15-2	common_wheat	USA	MIDWEST_winter	cultivar	AA	AA	AA	AA	AA	BB	AAAAAAAAAABB	1
KS07F5BULK01-K-7	common_wheat	USA	MIDWEST_winter	cultivar	AA	AA	AA	AA	AA	BB	AAAAAAAAAABB	1
KS07HW117	common_wheat	USA	MIDWEST_winter	cultivar	AA	AA	AA	AA	AA	BB	AAAAAAAAAABB	1
KS07HW25	common_wheat	USA	MIDWEST_winter	cultivar	AA	AA	AA	AA	AA	BB	AAAAAAAAAABB	1
KS07HW52-5	common_wheat	USA	MIDWEST_winter	cultivar	AA	AA	AA	AA	AA	BB	AAAAAAAAAABB	1
KS07HW81	common_wheat	USA	MIDWEST_winter	cultivar	AA	AA	AA	AA	AA	BB	AAAAAAAAAABB	1
KS08FHB-31	common_wheat	USA	MIDWEST_winter	cultivar	AA	AA	AA	AA	AA	BB	AAAAAAAAAABB	1
KS08HW176-4	common_wheat	USA	MIDWEST_winter	cultivar	AA	AA	AA	AA	AA	BB	AAAAAAAAAABB	1
KS93U50-LR42	common_wheat	USA	MIDWEST_winter	cultivar	AA	AA	AA	AA	AA	BB	AAAAAAAAAABB	1
KS970093-8-9-#1	common_wheat	USA	MIDWEST_winter	cultivar	AA	AA	AA	AA	AA	BB	AAAAAAAAAABB	1
KS970187-1-10	common_wheat	USA	MIDWEST_winter	cultivar	AA	AA	AA	AA	AA	BB	AAAAAAAAAABB	1	1
KS980512-2-2	common_wheat	USA	MIDWEST_winter	cultivar	AA	AA	AA	AA	AA	BB	AAAAAAAAAABB	1
LYMAN	common_wheat	USA	MIDWEST_winter	cultivar	AA	AA	AA	AA	AA	BB	AAAAAAAAAABB	1
M03-3616-C	common_wheat	USA	MIDWEST_winter	cultivar	AA	AA	AA	AA	AA	BB	AAAAAAAAAABB	1
M04*5109	common_wheat	USA	MIDWEST_winter	cultivar	AA	AA	AA	AA	AA	BB	AAAAAAAAAABB	1
M04-4566	common_wheat	USA	MIDWEST_winter	cultivar	AA	AA	AA	AA	AA	BB	AAAAAAAAAABB	1
M04-4802	common_wheat	USA	MIDWEST_winter	cultivar	AA	AA	AA	AA	AA	BB	AAAAAAAAAABB	1
MD01W233-06-1	common_wheat	USA	MIDWEST_winter	cultivar	AA	AA	AA	AA	AA	BB	AAAAAAAAAABB	1
MD99W483-06-9	common_wheat	USA	MIDWEST_winter	cultivar	AA	AA	AA	AA	AA	BB	AAAAAAAAAABB	1
MF-1	common_wheat	USA	MIDWEST_winter	cultivar	AA	AA	AA	AA	AA	BB	AAAAAAAAAABB	1
MF-2	common_wheat	USA	MIDWEST_winter	cultivar	AA	AA	AA	AA	AA	BB	AAAAAAAAAABB	1
MILLENNIUM	common_wheat	USA	MIDWEST_winter	cultivar	AA	AA	AA	AA	AA	BB	AAAAAAAAAABB	1
MILTON	common_wheat	USA	MIDWEST_winter	cultivar	AA	AA	AA	AA	AA	BB	AAAAAAAAAABB	1
MO011126	common_wheat	USA	MIDWEST_winter	cultivar	AA	AA	AA	AA	AA	BB	AAAAAAAAAABB	1
MO040152	common_wheat	USA	MIDWEST_winter	cultivar	AA	AA	AA	AA	AA	BB	AAAAAAAAAABB	1
MO050921	common_wheat	USA	MIDWEST_winter	cultivar	AA	AA	AA	AA	AA	BB	AAAAAAAAAABB	1
MO080104	common_wheat	USA	MIDWEST_winter	cultivar	AA	AA	AA	AA	AA	BB	AAAAAAAAAABB	1
MO081652	common_wheat	USA	MIDWEST_winter	cultivar	AA	AA	AA	AA	AA	BB	AAAAAAAAAABB	1
MO94-317	common_wheat	USA	MIDWEST_winter	cultivar	AA	AA	AA	AA	AA	BB	AAAAAAAAAABB	1
MO980525	common_wheat	USA	MIDWEST_winter	cultivar	AA	AA	AA	AA	AA	BB	AAAAAAAAAABB	1
MO980829	common_wheat	USA	MIDWEST_winter	cultivar	AA	AA	AA	AA	AA	BB	AAAAAAAAAABB	1
MOCHAEXP.	common_wheat	USA	MIDWEST_winter	cultivar	AA	AA	AA	AA	AA	BB	AAAAAAAAAABB	1
N98L20040-44	common_wheat	USA	MIDWEST_winter	cultivar	AA	AA	AA	AA	AA	BB	AAAAAAAAAABB	1
NE02533	common_wheat	USA	MIDWEST_winter	cultivar	AA	AA	AA	AA	AA	BB	AAAAAAAAAABB	1
NE02558	common_wheat	USA	MIDWEST_winter	cultivar	AA	AA	AA	AA	AA	BB	AAAAAAAAAABB	1
NE03490	common_wheat	USA	MIDWEST_winter	cultivar	AA	AA	AA	AA	AA	BB	AAAAAAAAAABB	1
NE04424	common_wheat	USA	MIDWEST_winter	cultivar	AA	AA	AA	AA	AA	BB	AAAAAAAAAABB	1
NE05548	common_wheat	USA	MIDWEST_winter	cultivar	AA	AA	AA	AA	AA	BB	AAAAAAAAAABB	1
NE05549	common_wheat	USA	MIDWEST_winter	cultivar	AA	AA	AA	AA	AA	BB	AAAAAAAAAABB	1
NE05569	common_wheat	USA	MIDWEST_winter	cultivar	AA	AA	AA	AA	AA	BB	AAAAAAAAAABB	1
NE06430	common_wheat	USA	MIDWEST_winter	cultivar	AA	AA	AA	AA	AA	BB	AAAAAAAAAABB	1
NE06436	common_wheat	USA	MIDWEST_winter	cultivar	AA	AA	AA	AA	AA	BB	AAAAAAAAAABB	1
NE06469	common_wheat	USA	MIDWEST_winter	cultivar	AA	AA	AA	AA	AA	BB	AAAAAAAAAABB	1
NE06472	common_wheat	USA	MIDWEST_winter	cultivar	AA	AA	AA	AA	AA	BB	AAAAAAAAAABB	1
NE06545	common_wheat	USA	MIDWEST_winter	cultivar	AA	AA	AA	AA	AA	BB	AAAAAAAAAABB	1
NE06549	common_wheat	USA	MIDWEST_winter	cultivar	AA	AA	AA	AA	AA	BB	AAAAAAAAAABB	1
NE0659	common_wheat	USA	MIDWEST_winter	cultivar	AA	AA	AA	AA	AA	BB	AAAAAAAAAABB	1
NE06607	common_wheat	USA	MIDWEST_winter	cultivar	AA	AA	AA	AA	AA	BB	AAAAAAAAAABB	1
NE06619	common_wheat	USA	MIDWEST_winter	cultivar	AA	AA	AA	AA	AA	BB	AAAAAAAAAABB	1
NE07409	common_wheat	USA	MIDWEST_winter	cultivar	AA	AA	AA	AA	AA	BB	AAAAAAAAAABB	1
NE07444	common_wheat	USA	MIDWEST_winter	cultivar	AA	AA	AA	AA	AA	BB	AAAAAAAAAABB	1
NE07486	common_wheat	USA	MIDWEST_winter	cultivar	AA	AA	AA	AA	AA	BB	AAAAAAAAAABB	1
NE07487	common_wheat	USA	MIDWEST_winter	cultivar	AA	AA	AA	AA	AA	BB	AAAAAAAAAABB	1
NE07627	common_wheat	USA	MIDWEST_winter	cultivar	AA	AA	AA	AA	AA	BB	AAAAAAAAAABB	1
NE07668	common_wheat	USA	MIDWEST_winter	cultivar	AA	AA	AA	AA	AA	BB	AAAAAAAAAABB	1
NE07688	common_wheat	USA	MIDWEST_winter	cultivar	AA	AA	AA	AA	AA	BB	AAAAAAAAAABB	1	1
NE08402	common_wheat	USA	MIDWEST_winter	cultivar	AA	AA	AA	AA	AA	BB	AAAAAAAAAABB	1
NE08407	common_wheat	USA	MIDWEST_winter	cultivar	AA	AA	AA	AA	AA	BB	AAAAAAAAAABB	1
NE08410	common_wheat	USA	MIDWEST_winter	cultivar	AA	AA	AA	AA	AA	BB	AAAAAAAAAABB	1
NE08435	common_wheat	USA	MIDWEST_winter	cultivar	AA	AA	AA	AA	AA	BB	AAAAAAAAAABB	1
NE08457	common_wheat	USA	MIDWEST_winter	cultivar	AA	AA	AA	AA	AA	BB	AAAAAAAAAABB	1
NE08459	common_wheat	USA	MIDWEST_winter	cultivar	AA	AA	AA	AA	AA	BB	AAAAAAAAAABB	1
NE08470	common_wheat	USA	MIDWEST_winter	cultivar	AA	AA	AA	AA	AA	BB	AAAAAAAAAABB	1
NE08476	common_wheat	USA	MIDWEST_winter	cultivar	AA	AA	AA	AA	AA	BB	AAAAAAAAAABB	1
NE08499	common_wheat	USA	MIDWEST_winter	cultivar	AA	AA	AA	AA	AA	BB	AAAAAAAAAABB	1
NE08509	common_wheat	USA	MIDWEST_winter	cultivar	AA	AA	AA	AA	AA	BB	AAAAAAAAAABB	1
NE08523	common_wheat	USA	MIDWEST_winter	cultivar	AA	AA	AA	AA	AA	BB	AAAAAAAAAABB	1
NE08531	common_wheat	USA	MIDWEST_winter	cultivar	AA	AA	AA	AA	AA	BB	AAAAAAAAAABB	1
NE08555	common_wheat	USA	MIDWEST_winter	cultivar	AA	AA	AA	AA	AA	BB	AAAAAAAAAABB	1
NE08651	common_wheat	USA	MIDWEST_winter	cultivar	AA	AA	AA	AA	AA	BB	AAAAAAAAAABB	1
NE09406	common_wheat	USA	MIDWEST_winter	cultivar	AA	AA	AA	AA	AA	BB	AAAAAAAAAABB	1
NE09422	common_wheat	USA	MIDWEST_winter	cultivar	AA	AA	AA	AA	AA	BB	AAAAAAAAAABB	1
NE09426	common_wheat	USA	MIDWEST_winter	cultivar	AA	AA	AA	AA	AA	BB	AAAAAAAAAABB	1
NE09429	common_wheat	USA	MIDWEST_winter	cultivar	AA	AA	AA	AA	AA	BB	AAAAAAAAAABB	1
NE09437	common_wheat	USA	MIDWEST_winter	cultivar	AA	AA	AA	AA	AA	BB	AAAAAAAAAABB	1
NE09460	common_wheat	USA	MIDWEST_winter	cultivar	AA	AA	AA	AA	AA	BB	AAAAAAAAAABB	1
NE09462	common_wheat	USA	MIDWEST_winter	cultivar	AA	AA	AA	AA	AA	BB	AAAAAAAAAABB	1
NE09470	common_wheat	USA	MIDWEST_winter	cultivar	AA	AA	AA	AA	AA	BB	AAAAAAAAAABB	1
NE09474	common_wheat	USA	MIDWEST_winter	cultivar	AA	AA	AA	AA	AA	BB	AAAAAAAAAABB	1
NE09476	common_wheat	USA	MIDWEST_winter	cultivar	AA	AA	AA	AA	AA	BB	AAAAAAAAAABB	1
NE09478	common_wheat	USA	MIDWEST_winter	cultivar	AA	AA	AA	AA	AA	BB	AAAAAAAAAABB	1
NE09480	common_wheat	USA	MIDWEST_winter	cultivar	AA	AA	AA	AA	AA	BB	AAAAAAAAAABB	1
NE09481	common_wheat	USA	MIDWEST_winter	cultivar	AA	AA	AA	AA	AA	BB	AAAAAAAAAABB	1	1
NE09482	common_wheat	USA	MIDWEST_winter	cultivar	AA	AA	AA	AA	AA	BB	AAAAAAAAAABB	1
NE09483	common_wheat	USA	MIDWEST_winter	cultivar	AA	AA	AA	AA	AA	BB	AAAAAAAAAABB	1
NE09484	common_wheat	USA	MIDWEST_winter	cultivar	AA	AA	AA	AA	AA	BB	AAAAAAAAAABB	1
NE09487	common_wheat	USA	MIDWEST_winter	cultivar	AA	AA	AA	AA	AA	BB	AAAAAAAAAABB	1
NE09491	common_wheat	USA	MIDWEST_winter	cultivar	AA	AA	AA	AA	AA	BB	AAAAAAAAAABB	1
NE09498	common_wheat	USA	MIDWEST_winter	cultivar	AA	AA	AA	AA	AA	BB	AAAAAAAAAABB	1
NE09499	common_wheat	USA	MIDWEST_winter	cultivar	AA	AA	AA	AA	AA	BB	AAAAAAAAAABB	1
NE09506	common_wheat	USA	MIDWEST_winter	cultivar	AA	AA	AA	AA	AA	BB	AAAAAAAAAABB	1
NE09515	common_wheat	USA	MIDWEST_winter	cultivar	AA	AA	AA	AA	AA	BB	AAAAAAAAAABB	1
NE09521	common_wheat	USA	MIDWEST_winter	cultivar	AA	AA	AA	AA	AA	BB	AAAAAAAAAABB	1
NE09522	common_wheat	USA	MIDWEST_winter	cultivar	AA	AA	AA	AA	AA	BB	AAAAAAAAAABB	1
NE09540	common_wheat	USA	MIDWEST_winter	cultivar	AA	AA	AA	AA	AA	BB	AAAAAAAAAABB	1
NE09547	common_wheat	USA	MIDWEST_winter	cultivar	AA	AA	AA	AA	AA	BB	AAAAAAAAAABB	1
NE09559	common_wheat	USA	MIDWEST_winter	cultivar	AA	AA	AA	AA	AA	BB	AAAAAAAAAABB	1
NE09560	common_wheat	USA	MIDWEST_winter	cultivar	AA	AA	AA	AA	AA	BB	AAAAAAAAAABB	1
NE09583	common_wheat	USA	MIDWEST_winter	cultivar	AA	AA	AA	AA	AA	BB	AAAAAAAAAABB	1
NE09584	common_wheat	USA	MIDWEST_winter	cultivar	AA	AA	AA	AA	AA	BB	AAAAAAAAAABB	1
NE09586	common_wheat	USA	MIDWEST_winter	cultivar	AA	AA	AA	AA	AA	BB	AAAAAAAAAABB	1
NE09587	common_wheat	USA	MIDWEST_winter	cultivar	AA	AA	AA	AA	AA	BB	AAAAAAAAAABB	1
NE09591	common_wheat	USA	MIDWEST_winter	cultivar	AA	AA	AA	AA	AA	BB	AAAAAAAAAABB	1
NE09599	common_wheat	USA	MIDWEST_winter	cultivar	AA	AA	AA	AA	AA	BB	AAAAAAAAAABB	1
NE09601	common_wheat	USA	MIDWEST_winter	cultivar	AA	AA	AA	AA	AA	BB	AAAAAAAAAABB	1
NE09628	common_wheat	USA	MIDWEST_winter	cultivar	AA	AA	AA	AA	AA	BB	AAAAAAAAAABB	1
NE09637	common_wheat	USA	MIDWEST_winter	cultivar	AA	AA	AA	AA	AA	BB	AAAAAAAAAABB	1
NE09638	common_wheat	USA	MIDWEST_winter	cultivar	AA	AA	AA	AA	AA	BB	AAAAAAAAAABB	1
NE09641	common_wheat	USA	MIDWEST_winter	cultivar	AA	AA	AA	AA	AA	BB	AAAAAAAAAABB	1
NE09680	common_wheat	USA	MIDWEST_winter	cultivar	AA	AA	AA	AA	AA	BB	AAAAAAAAAABB	1
NE09684	common_wheat	USA	MIDWEST_winter	cultivar	AA	AA	AA	AA	AA	BB	AAAAAAAAAABB	1
NH09563	common_wheat	USA	MIDWEST_winter	cultivar	AA	AA	AA	AA	AA	BB	AAAAAAAAAABB	1
NHH09655	common_wheat	USA	MIDWEST_winter	cultivar	AA	AA	AA	AA	AA	BB	AAAAAAAAAABB	1
NI04420	common_wheat	USA	MIDWEST_winter	cultivar	AA	AA	AA	AA	AA	BB	AAAAAAAAAABB	1
NI04427	common_wheat	USA	MIDWEST_winter	cultivar	AA	AA	AA	AA	AA	BB	AAAAAAAAAABB	1
NI06427	common_wheat	USA	MIDWEST_winter	cultivar	AA	AA	AA	AA	AA	BB	AAAAAAAAAABB	1
NI06731	common_wheat	USA	MIDWEST_winter	cultivar	AA	AA	AA	AA	AA	BB	AAAAAAAAAABB	1
NI06736	common_wheat	USA	MIDWEST_winter	cultivar	AA	AA	AA	AA	AA	BB	AAAAAAAAAABB	1
NI06737	common_wheat	USA	MIDWEST_winter	cultivar	AA	AA	AA	AA	AA	BB	AAAAAAAAAABB	1
NI07703	common_wheat	USA	MIDWEST_winter	cultivar	AA	AA	AA	AA	AA	BB	AAAAAAAAAABB	1
NI08708	common_wheat	USA	MIDWEST_winter	cultivar	AA	AA	AA	AA	AA	BB	AAAAAAAAAABB	1
NI08714	common_wheat	USA	MIDWEST_winter	cultivar	AA	AA	AA	AA	AA	BB	AAAAAAAAAABB	1
NI08715	common_wheat	USA	MIDWEST_winter	cultivar	AA	AA	AA	AA	AA	BB	AAAAAAAAAABB	1
NI09703	common_wheat	USA	MIDWEST_winter	cultivar	AA	AA	AA	AA	AA	BB	AAAAAAAAAABB	1
NI09706	common_wheat	USA	MIDWEST_winter	cultivar	AA	AA	AA	AA	AA	BB	AAAAAAAAAABB	1
NI09707	common_wheat	USA	MIDWEST_winter	cultivar	AA	AA	AA	AA	AA	BB	AAAAAAAAAABB	1
NI09709	common_wheat	USA	MIDWEST_winter	cultivar	AA	AA	AA	AA	AA	BB	AAAAAAAAAABB	1
NI09710	common_wheat	USA	MIDWEST_winter	cultivar	AA	AA	AA	AA	AA	BB	AAAAAAAAAABB	1
NI09714	common_wheat	USA	MIDWEST_winter	cultivar	AA	AA	AA	AA	AA	BB	AAAAAAAAAABB	1
NI09715	common_wheat	USA	MIDWEST_winter	cultivar	AA	AA	AA	AA	AA	BB	AAAAAAAAAABB	1
NI10703	common_wheat	USA	MIDWEST_winter	cultivar	AA	AA	AA	AA	AA	BB	AAAAAAAAAABB	1
NI10704	common_wheat	USA	MIDWEST_winter	cultivar	AA	AA	AA	AA	AA	BB	AAAAAAAAAABB	1
NI10705	common_wheat	USA	MIDWEST_winter	cultivar	AA	AA	AA	AA	AA	BB	AAAAAAAAAABB	1
NI10706	common_wheat	USA	MIDWEST_winter	cultivar	AA	AA	AA	AA	AA	BB	AAAAAAAAAABB	1
NI10707	common_wheat	USA	MIDWEST_winter	cultivar	AA	AA	AA	AA	AA	BB	AAAAAAAAAABB	1
NI10708	common_wheat	USA	MIDWEST_winter	cultivar	AA	AA	AA	AA	AA	BB	AAAAAAAAAABB	1
NI10709	common_wheat	USA	MIDWEST_winter	cultivar	AA	AA	AA	AA	AA	BB	AAAAAAAAAABB	1
NI10710	common_wheat	USA	MIDWEST_winter	cultivar	AA	AA	AA	AA	AA	BB	AAAAAAAAAABB	1
NI10710.2	common_wheat	USA	MIDWEST_winter	cultivar	AA	AA	AA	AA	AA	BB	AAAAAAAAAABB	1
NI10711	common_wheat	USA	MIDWEST_winter	cultivar	AA	AA	AA	AA	AA	BB	AAAAAAAAAABB	1
NI10712	common_wheat	USA	MIDWEST_winter	cultivar	AA	AA	AA	AA	AA	BB	AAAAAAAAAABB	1	1
NI10713	common_wheat	USA	MIDWEST_winter	cultivar	AA	AA	AA	AA	AA	BB	AAAAAAAAAABB	1
NI10714	common_wheat	USA	MIDWEST_winter	cultivar	AA	AA	AA	AA	AA	BB	AAAAAAAAAABB	1
NI10715	common_wheat	USA	MIDWEST_winter	cultivar	AA	AA	AA	AA	AA	BB	AAAAAAAAAABB	1
NI10716	common_wheat	USA	MIDWEST_winter	cultivar	AA	AA	AA	AA	AA	BB	AAAAAAAAAABB	1
NI10717	common_wheat	USA	MIDWEST_winter	cultivar	AA	AA	AA	AA	AA	BB	AAAAAAAAAABB	1
NI10718	common_wheat	USA	MIDWEST_winter	cultivar	AA	AA	AA	AA	AA	BB	AAAAAAAAAABB	1
NI10719	common_wheat	USA	MIDWEST_winter	cultivar	AA	AA	AA	AA	AA	BB	AAAAAAAAAABB	1
NI10720	common_wheat	USA	MIDWEST_winter	cultivar	AA	AA	AA	AA	AA	BB	AAAAAAAAAABB	1
NW03666	common_wheat	USA	MIDWEST_winter	cultivar	AA	AA	AA	AA	AA	BB	AAAAAAAAAABB	1
NW05M6011-6-1	common_wheat	USA	MIDWEST_winter	cultivar	AA	AA	AA	AA	AA	BB	AAAAAAAAAABB	1
NW05M6015-25-4	common_wheat	USA	MIDWEST_winter	cultivar	AA	AA	AA	AA	AA	BB	AAAAAAAAAABB	1
NW07505	common_wheat	USA	MIDWEST_winter	cultivar	AA	AA	AA	AA	AA	BB	AAAAAAAAAABB	1
NW08460	common_wheat	USA	MIDWEST_winter	cultivar	AA	AA	AA	AA	AA	BB	AAAAAAAAAABB	1
NW08463	common_wheat	USA	MIDWEST_winter	cultivar	AA	AA	AA	AA	AA	BB	AAAAAAAAAABB	1
NW09615	common_wheat	USA	MIDWEST_winter	cultivar	AA	AA	AA	AA	AA	BB	AAAAAAAAAABB	1
NW09617	common_wheat	USA	MIDWEST_winter	cultivar	AA	AA	AA	AA	AA	BB	AAAAAAAAAABB	1
NW09618	common_wheat	USA	MIDWEST_winter	cultivar	AA	AA	AA	AA	AA	BB	AAAAAAAAAABB	1
NW09622	common_wheat	USA	MIDWEST_winter	cultivar	AA	AA	AA	AA	AA	BB	AAAAAAAAAABB	1
NW09627	common_wheat	USA	MIDWEST_winter	cultivar	AA	AA	AA	AA	AA	BB	AAAAAAAAAABB	1
NW09632	common_wheat	USA	MIDWEST_winter	cultivar	AA	AA	AA	AA	AA	BB	AAAAAAAAAABB	1
NX03Y2489	common_wheat	USA	MIDWEST_winter	cultivar	AA	AA	AA	AA	AA	BB	AAAAAAAAAABB	1
NX04Y2107	common_wheat	USA	MIDWEST_winter	cultivar	AA	AA	AA	AA	AA	BB	AAAAAAAAAABB	1
NX05M4180-6	common_wheat	USA	MIDWEST_winter	cultivar	AA	AA	AA	AA	AA	BB	AAAAAAAAAABB	1
OAKS	common_wheat	USA	MIDWEST_winter	cultivar	AA	AA	AA	AA	AA	BB	AAAAAAAAAABB	1
OK00514-05806	common_wheat	USA	MIDWEST_winter	cultivar	AA	AA	AA	AA	AA	BB	AAAAAAAAAABB	1
OK01420W	common_wheat	USA	MIDWEST_winter	cultivar	AA	AA	AA	AA	AA	BB	AAAAAAAAAABB	1
OK03716W	common_wheat	USA	MIDWEST_winter	cultivar	AA	AA	AA	AA	AA	BB	AAAAAAAAAABB	1
OK03825-5403-6	common_wheat	USA	MIDWEST_winter	cultivar	AA	AA	AA	AA	AA	BB	AAAAAAAAAABB	1
OK05128	common_wheat	USA	MIDWEST_winter	cultivar	AA	AA	AA	AA	AA	BB	AAAAAAAAAABB	1
OK05903C	common_wheat	USA	MIDWEST_winter	cultivar	AA	AA	AA	AA	AA	BB	AAAAAAAAAABB	1
OK06313	common_wheat	USA	MIDWEST_winter	cultivar	AA	AA	AA	AA	AA	BB	AAAAAAAAAABB	1
OK06518	common_wheat	USA	MIDWEST_winter	cultivar	AA	AA	AA	AA	AA	BB	AAAAAAAAAABB	1
OK06528	common_wheat	USA	MIDWEST_winter	cultivar	AA	AA	AA	AA	AA	BB	AAAAAAAAAABB	1
OK06848W	common_wheat	USA	MIDWEST_winter	cultivar	AA	AA	AA	AA	AA	BB	AAAAAAAAAABB	1
OK07209	common_wheat	USA	MIDWEST_winter	cultivar	AA	AA	AA	AA	AA	BB	AAAAAAAAAABB	1
OVERLAND	common_wheat	USA	MIDWEST_winter	cultivar	AA	AA	AA	AA	AA	BB	AAAAAAAAAABB	1
P04287A1-10	common_wheat	USA	MIDWEST_winter	cultivar	AA	AA	AA	AA	AA	BB	AAAAAAAAAABB	1
PARKER	common_wheat	USA	MIDWEST_winter	cultivar	AA	AA	AA	AA	AA	BB	AAAAAAAAAABB	1
PARKER76	common_wheat	USA	MIDWEST_winter	cultivar	AA	AA	AA	AA	AA	BB	AAAAAAAAAABB	1
PHS2008F206BAB	common_wheat	USA	MIDWEST_winter	cultivar	AA	AA	AA	AA	AA	BB	AAAAAAAAAABB	1
PHS2008F212BBB	common_wheat	USA	MIDWEST_winter	cultivar	AA	AA	AA	AA	AA	BB	AAAAAAAAAABB	1
PROTECTIONCL	common_wheat	USA	MIDWEST_winter	cultivar	AA	AA	AA	AA	AA	BB	AAAAAAAAAABB	1
RIOBLANCO	common_wheat	USA	MIDWEST_winter	cultivar	AA	AA	AA	AA	AA	BB	AAAAAAAAAABB	1
ROANE	common_wheat	USA	MIDWEST_winter	cultivar	AA	AA	AA	AA	AA	BB	AAAAAAAAAABB	1
ROBIDOUX	common_wheat	USA	MIDWEST_winter	cultivar	AA	AA	AA	AA	AA	BB	AAAAAAAAAABB	1
SAGE	common_wheat	USA	MIDWEST_winter	cultivar	AA	AA	AA	AA	AA	BB	AAAAAAAAAABB	1
SANTA_FE	common_wheat	USA	MIDWEST_winter	cultivar	AA	AA	AA	AA	AA	BB	AAAAAAAAAABB	1
SCOUT66	common_wheat	USA	MIDWEST_winter	cultivar	AA	AA	AA	AA	AA	BB	AAAAAAAAAABB	1
SHAWNEE	common_wheat	USA	MIDWEST_winter	cultivar	AA	AA	AA	AA	AA	BB	AAAAAAAAAABB	1
SNOWMASS	common_wheat	USA	MIDWEST_winter	cultivar	AA	AA	AA	AA	AA	BB	AAAAAAAAAABB	1
SS560	common_wheat	USA	MIDWEST_winter	cultivar	AA	AA	AA	AA	AA	BB	AAAAAAAAAABB	1
T-136	common_wheat	USA	MIDWEST_winter	cultivar	AA	AA	AA	AA	AA	BB	AAAAAAAAAABB	1
T-140	common_wheat	USA	MIDWEST_winter	cultivar	AA	AA	AA	AA	AA	BB	AAAAAAAAAABB	1
T151	common_wheat	USA	MIDWEST_winter	cultivar	AA	AA	AA	AA	AA	BB	AAAAAAAAAABB	1
T153	common_wheat	USA	MIDWEST_winter	cultivar	AA	AA	AA	AA	AA	BB	AAAAAAAAAABB	1
T154	common_wheat	USA	MIDWEST_winter	cultivar	AA	AA	AA	AA	AA	BB	AAAAAAAAAABB	1
T158	common_wheat	USA	MIDWEST_winter	cultivar	AA	AA	AA	AA	AA	BB	AAAAAAAAAABB	1
T81	common_wheat	USA	MIDWEST_winter	cultivar	AA	AA	AA	AA	AA	BB	AAAAAAAAAABB	1
TAM107	common_wheat	USA	MIDWEST_winter	cultivar	AA	AA	AA	AA	AA	BB	AAAAAAAAAABB	1
TAM109	common_wheat	USA	MIDWEST_winter	cultivar	AA	AA	AA	AA	AA	BB	AAAAAAAAAABB	1
TAM110	common_wheat	USA	MIDWEST_winter	cultivar	AA	AA	AA	AA	AA	BB	AAAAAAAAAABB	1
TAM111	common_wheat	USA	MIDWEST_winter	cultivar	AA	AA	AA	AA	AA	BB	AAAAAAAAAABB	1
TAM112	common_wheat	USA	MIDWEST_winter	cultivar	AA	AA	AA	AA	AA	BB	AAAAAAAAAABB	1
TAM200	common_wheat	USA	MIDWEST_winter	cultivar	AA	AA	AA	AA	AA	BB	AAAAAAAAAABB	1
TAM202	common_wheat	USA	MIDWEST_winter	cultivar	AA	AA	AA	AA	AA	BB	AAAAAAAAAABB	1
TAM203	common_wheat	USA	MIDWEST_winter	cultivar	AA	AA	AA	AA	AA	BB	AAAAAAAAAABB	1
TAM303	common_wheat	USA	MIDWEST_winter	cultivar	AA	AA	AA	AA	AA	BB	AAAAAAAAAABB	1
TAM304	common_wheat	USA	MIDWEST_winter	cultivar	AA	AA	AA	AA	AA	BB	AAAAAAAAAABB	1
TAM400	common_wheat	USA	MIDWEST_winter	cultivar	AA	AA	AA	AA	AA	BB	AAAAAAAAAABB	1
TAM401	common_wheat	USA	MIDWEST_winter	cultivar	AA	AA	AA	AA	AA	BB	AAAAAAAAAABB	1
TAMW-101	common_wheat	USA	MIDWEST_winter	cultivar	AA	AA	AA	AA	AA	BB	AAAAAAAAAABB	1
TASCOSA	common_wheat	USA	MIDWEST_winter	cultivar	AA	AA	AA	AA	AA	BB	AAAAAAAAAABB	1
TN801	common_wheat	USA	MIDWEST_winter	cultivar	AA	AA	AA	AA	AA	BB	AAAAAAAAAABB	1
TRISON	common_wheat	USA	MIDWEST_winter	cultivar	AA	AA	AA	AA	AA	BB	AAAAAAAAAABB	1
TRIUMPH64	common_wheat	USA	MIDWEST_winter	cultivar	AA	AA	AA	AA	AA	BB	AAAAAAAAAABB	1
TX05A001334	common_wheat	USA	MIDWEST_winter	cultivar	AA	AA	AA	AA	AA	BB	AAAAAAAAAABB	1
TX05A001822	common_wheat	USA	MIDWEST_winter	cultivar	AA	AA	AA	AA	AA	BB	AAAAAAAAAABB	1
TX05V5614	common_wheat	USA	MIDWEST_winter	cultivar	AA	AA	AA	AA	AA	BB	AAAAAAAAAABB	1
TX06A001084	common_wheat	USA	MIDWEST_winter	cultivar	AA	AA	AA	AA	AA	BB	AAAAAAAAAABB	1
TX06A001239	common_wheat	USA	MIDWEST_winter	cultivar	AA	AA	AA	AA	AA	BB	AAAAAAAAAABB	1
TX06A001263	common_wheat	USA	MIDWEST_winter	cultivar	AA	AA	AA	AA	AA	BB	AAAAAAAAAABB	1
TX06A001281	common_wheat	USA	MIDWEST_winter	cultivar	AA	AA	AA	AA	AA	BB	AAAAAAAAAABB	1
TX06A001376	common_wheat	USA	MIDWEST_winter	cultivar	AA	AA	AA	AA	AA	BB	AAAAAAAAAABB	1
TX06A001431	common_wheat	USA	MIDWEST_winter	cultivar	AA	AA	AA	AA	AA	BB	AAAAAAAAAABB	1
TXHT006F8-CS06/472-STA34	common_wheat	USA	MIDWEST_winter	cultivar	AA	AA	AA	AA	AA	BB	AAAAAAAAAABB	1
TXHT023F7-CS06/607-STA07/40	common_wheat	USA	MIDWEST_winter	cultivar	AA	AA	AA	AA	AA	BB	AAAAAAAAAABB	1
USG3555	common_wheat	USA	MIDWEST_winter	cultivar	AA	AA	AA	AA	AA	BB	AAAAAAAAAABB	1
VA04W-259	common_wheat	USA	MIDWEST_winter	cultivar	AA	AA	AA	AA	AA	BB	AAAAAAAAAABB	1
VA05W-258	common_wheat	USA	MIDWEST_winter	cultivar	AA	AA	AA	AA	AA	BB	AAAAAAAAAABB	1
VA05W-414	common_wheat	USA	MIDWEST_winter	cultivar	AA	AA	AA	AA	AA	BB	AAAAAAAAAABB	1
VA05W-78	common_wheat	USA	MIDWEST_winter	cultivar	AA	AA	AA	AA	AA	BB	AAAAAAAAAABB	1
W06-202B	common_wheat	USA	MIDWEST_winter	cultivar	AA	AA	AA	AA	AA	BB	AAAAAAAAAABB	1
W98007V1	common_wheat	USA	MIDWEST_winter	cultivar	AA	AA	AA	AA	AA	BB	AAAAAAAAAABB	1
W98008J1	common_wheat	USA	MIDWEST_winter	cultivar	AA	AA	AA	AA	AA	BB	AAAAAAAAAABB	1
WESLEY	common_wheat	USA	MIDWEST_winter	cultivar	AA	AA	AA	AA	AA	BB	AAAAAAAAAABB	1
WINTERHAWK	common_wheat	USA	MIDWEST_winter	cultivar	AA	AA	AA	AA	AA	BB	AAAAAAAAAABB	1
X151	common_wheat	USA	MIDWEST_winter	cultivar	AA	AA	AA	AA	AA	BB	AAAAAAAAAABB	1
KS010957K~4	common_wheat	USA	MIDWEST_winter	cultivar	AA	AA	AA	AA	AA	BB	AAAAAAAAAABB	1
KS020304K~3	common_wheat	USA	MIDWEST_winter	cultivar	AA	AA	AA	AA	AA	BB	AAAAAAAAAABB	1
KS031027-FHB~8	common_wheat	USA	MIDWEST_winter	cultivar	AA	AA	AA	AA	AA	BB	AAAAAAAAAABB	1
KS980554-12-~9	common_wheat	USA	MIDWEST_winter	cultivar	AA	AA	AA	AA	AA	BB	AAAAAAAAAABB	1
9-1RSACTUALLYLABELED9-1MA	common_wheat	USA	PNW_spring	cultivar	AA	AA	AA	AA	AA	BB	AAAAAAAAAABB	1
9-MA	common_wheat	USA	PNW_spring	cultivar	AA	AA	AA	AA	AA	BB	AAAAAAAAAABB	1
A-1RS	common_wheat	USA	PNW_spring	cultivar	AA	AA	AA	AA	AA	BB	AAAAAAAAAABB	1
A-MA	common_wheat	USA	PNW_spring	cultivar	AA	AA	AA	AA	AA	BB	AAAAAAAAAABB	1
ALSEN	common_wheat	USA	PNW_spring	cultivar	AA	AA	AA	AA	AA	BB	AAAAAAAAAABB	1
ALTURAS	common_wheat	USA	PNW_spring	cultivar	AA	AA	AA	AA	AA	BB	AAAAAAAAAABB	1
BLANCA	common_wheat	USA	PNW_spring	cultivar	AA	AA	AA	AA	AA	BB	AAAAAAAAAABB	1
BLISS	common_wheat	USA	PNW_spring	cultivar	AA	AA	AA	AA	AA	BB	AAAAAAAAAABB	1	1
BR7030	common_wheat	USA	PNW_spring	cultivar	AA	AA	AA	AA	AA	BB	AAAAAAAAAABB	1
BUCKPRONTO	common_wheat	USA	PNW_spring	cultivar	AA	AA	AA	AA	AA	BB	AAAAAAAAAABB	1
CA-902-701	common_wheat	USA	PNW_spring	cultivar	AA	AA	AA	AA	AA	BB	AAAAAAAAAABB	1
CA-904-742	common_wheat	USA	PNW_spring	cultivar	AA	AA	AA	AA	AA	BB	AAAAAAAAAABB	1
CA-904-743	common_wheat	USA	PNW_spring	cultivar	AA	AA	AA	AA	AA	BB	AAAAAAAAAABB	1
CA-905-780	common_wheat	USA	PNW_spring	cultivar	AA	AA	AA	AA	AA	BB	AAAAAAAAAABB	1
CA-907-824	common_wheat	USA	PNW_spring	cultivar	AA	AA	AA	AA	AA	BB	AAAAAAAAAABB	1
CA-907-834	common_wheat	USA	PNW_spring	cultivar	AA	AA	AA	AA	AA	BB	AAAAAAAAAABB	1
CA905-750	common_wheat	USA	PNW_spring	cultivar	AA	AA	AA	AA	AA	BB	AAAAAAAAAABB	1
CA905-751	common_wheat	USA	PNW_spring	cultivar	AA	AA	AA	AA	AA	BB	AAAAAAAAAABB	1
CA905-752	common_wheat	USA	PNW_spring	cultivar	AA	AA	AA	AA	AA	BB	AAAAAAAAAABB	1
CA905-776	common_wheat	USA	PNW_spring	cultivar	AA	AA	AA	AA	AA	BB	AAAAAAAAAABB	1
CA905-781	common_wheat	USA	PNW_spring	cultivar	AA	AA	AA	AA	AA	BB	AAAAAAAAAABB	1
CA907-827	common_wheat	USA	PNW_spring	cultivar	AA	AA	AA	AA	AA	BB	AAAAAAAAAABB	1
CA908-801	common_wheat	USA	PNW_spring	cultivar	AA	AA	AA	AA	AA	BB	AAAAAAAAAABB	1
CENTENNIAL	common_wheat	USA	PNW_spring	cultivar	AA	AA	AA	AA	AA	BB	AAAAAAAAAABB	1
CLEAR_WHITE	common_wheat	USA	PNW_spring	cultivar	AA	AA	AA	AA	AA	BB	AAAAAAAAAABB	1
CO80046	common_wheat	USA	PNW_spring	cultivar	AA	AA	AA	AA	AA	BB	AAAAAAAAAABB	1
CO900004	common_wheat	USA	PNW_spring	cultivar	AA	AA	AA	AA	AA	BB	AAAAAAAAAABB	1
CO900037	common_wheat	USA	PNW_spring	cultivar	AA	AA	AA	AA	AA	BB	AAAAAAAAAABB	1
CONAN	common_wheat	USA	PNW_spring	cultivar	AA	AA	AA	AA	AA	BB	AAAAAAAAAABB	1
EDEN	common_wheat	USA	PNW_spring	cultivar	AA	AA	AA	AA	AA	BB	AAAAAAAAAABB	1
FIELDWIN	common_wheat	USA	PNW_spring	cultivar	AA	AA	AA	AA	AA	BB	AAAAAAAAAABB	1
H-1RS	common_wheat	USA	PNW_spring	cultivar	AA	AA	AA	AA	AA	BB	AAAAAAAAAABB	1
H-MA	common_wheat	USA	PNW_spring	cultivar	AA	AA	AA	AA	AA	BB	AAAAAAAAAABB	1
H0800103L	common_wheat	USA	PNW_spring	cultivar	AA	AA	AA	AA	AA	BB	AAAAAAAAAABB	1
H0800254	common_wheat	USA	PNW_spring	cultivar	AA	AA	AA	AA	AA	BB	AAAAAAAAAABB	1
H0900080	common_wheat	USA	PNW_spring	cultivar	AA	AA	AA	AA	AA	BB	AAAAAAAAAABB	1
H0900081	common_wheat	USA	PNW_spring	cultivar	AA	AA	AA	AA	AA	BB	AAAAAAAAAABB	1
H0900084	common_wheat	USA	PNW_spring	cultivar	AA	AA	AA	AA	AA	BB	AAAAAAAAAABB	1
HT080158LU	common_wheat	USA	PNW_spring	cultivar	AA	AA	AA	AA	AA	BB	AAAAAAAAAABB	1
HW080066	common_wheat	USA	PNW_spring	cultivar	AA	AA	AA	AA	AA	BB	AAAAAAAAAABB	1
HW080140	common_wheat	USA	PNW_spring	cultivar	AA	AA	AA	AA	AA	BB	AAAAAAAAAABB	1
HW090017L	common_wheat	USA	PNW_spring	cultivar	AA	AA	AA	AA	AA	BB	AAAAAAAAAABB	1
HW090109L	common_wheat	USA	PNW_spring	cultivar	AA	AA	AA	AA	AA	BB	AAAAAAAAAABB	1
IDAHO377S	common_wheat	USA	PNW_spring	cultivar	AA	AA	AA	AA	AA	BB	AAAAAAAAAABB	1
IDO409	common_wheat	USA	PNW_spring	cultivar	AA	AA	AA	AA	AA	BB	AAAAAAAAAABB	1
IDO415	common_wheat	USA	PNW_spring	cultivar	AA	AA	AA	AA	AA	BB	AAAAAAAAAABB	1
IDO440	common_wheat	USA	PNW_spring	cultivar	AA	AA	AA	AA	AA	BB	AAAAAAAAAABB	1
IDO441	common_wheat	USA	PNW_spring	cultivar	AA	AA	AA	AA	AA	BB	AAAAAAAAAABB	1	1
IDO470	common_wheat	USA	PNW_spring	cultivar	AA	AA	AA	AA	AA	BB	AAAAAAAAAABB	1
IDO474	common_wheat	USA	PNW_spring	cultivar	AA	AA	AA	AA	AA	BB	AAAAAAAAAABB	1
IDO505	common_wheat	USA	PNW_spring	cultivar	AA	AA	AA	AA	AA	BB	AAAAAAAAAABB	1
IDO552	common_wheat	USA	PNW_spring	cultivar	AA	AA	AA	AA	AA	BB	AAAAAAAAAABB	1
IDO557	common_wheat	USA	PNW_spring	cultivar	AA	AA	AA	AA	AA	BB	AAAAAAAAAABB	1
IDO560	common_wheat	USA	PNW_spring	cultivar	AA	AA	AA	AA	AA	BB	AAAAAAAAAABB	1
IDO563	common_wheat	USA	PNW_spring	cultivar	AA	AA	AA	AA	AA	BB	AAAAAAAAAABB	1
IDO582	common_wheat	USA	PNW_spring	cultivar	AA	AA	AA	AA	AA	BB	AAAAAAAAAABB	1
IDO584	common_wheat	USA	PNW_spring	cultivar	AA	AA	AA	AA	AA	BB	AAAAAAAAAABB	1
IDO585	common_wheat	USA	PNW_spring	cultivar	AA	AA	AA	AA	AA	BB	AAAAAAAAAABB	1
IDO596	common_wheat	USA	PNW_spring	cultivar	AA	AA	AA	AA	AA	BB	AAAAAAAAAABB	1
IDO607	common_wheat	USA	PNW_spring	cultivar	AA	AA	AA	AA	AA	BB	AAAAAAAAAABB	1
IDO608	common_wheat	USA	PNW_spring	cultivar	AA	AA	AA	AA	AA	BB	AAAAAAAAAABB	1
IDO609	common_wheat	USA	PNW_spring	cultivar	AA	AA	AA	AA	AA	BB	AAAAAAAAAABB	1
IDO610	common_wheat	USA	PNW_spring	cultivar	AA	AA	AA	AA	AA	BB	AAAAAAAAAABB	1
IDO644	common_wheat	USA	PNW_spring	cultivar	AA	AA	AA	AA	AA	BB	AAAAAAAAAABB	1
IDO669	common_wheat	USA	PNW_spring	cultivar	AA	AA	AA	AA	AA	BB	AAAAAAAAAABB	1
IDO671	common_wheat	USA	PNW_spring	cultivar	AA	AA	AA	AA	AA	BB	AAAAAAAAAABB	1
IDO686	common_wheat	USA	PNW_spring	cultivar	AA	AA	AA	AA	AA	BB	AAAAAAAAAABB	1
IDO687	common_wheat	USA	PNW_spring	cultivar	AA	AA	AA	AA	AA	BB	AAAAAAAAAABB	1
IDO688	common_wheat	USA	PNW_spring	cultivar	AA	AA	AA	AA	AA	BB	AAAAAAAAAABB	1
IDO689	common_wheat	USA	PNW_spring	cultivar	AA	AA	AA	AA	AA	BB	AAAAAAAAAABB	1	1
IDO698	common_wheat	USA	PNW_spring	cultivar	AA	AA	AA	AA	AA	BB	AAAAAAAAAABB	1
IDO707	common_wheat	USA	PNW_spring	cultivar	AA	AA	AA	AA	AA	BB	AAAAAAAAAABB	1
IDO850	common_wheat	USA	PNW_spring	cultivar	AA	AA	AA	AA	AA	BB	AAAAAAAAAABB	1
IDO851	common_wheat	USA	PNW_spring	cultivar	AA	AA	AA	AA	AA	BB	AAAAAAAAAABB	1
IDO852	common_wheat	USA	PNW_spring	cultivar	AA	AA	AA	AA	AA	BB	AAAAAAAAAABB	1
IDO854	common_wheat	USA	PNW_spring	cultivar	AA	AA	AA	AA	AA	BB	AAAAAAAAAABB	1
IDO856	common_wheat	USA	PNW_spring	cultivar	AA	AA	AA	AA	AA	BB	AAAAAAAAAABB	1
IDO862	common_wheat	USA	PNW_spring	cultivar	AA	AA	AA	AA	AA	BB	AAAAAAAAAABB	1
IDO868	common_wheat	USA	PNW_spring	cultivar	AA	AA	AA	AA	AA	BB	AAAAAAAAAABB	1
IDO872	common_wheat	USA	PNW_spring	cultivar	AA	AA	AA	AA	AA	BB	AAAAAAAAAABB	1
JUBILEE	common_wheat	USA	PNW_spring	cultivar	AA	AA	AA	AA	AA	BB	AAAAAAAAAABB	1
KLASIC	common_wheat	USA	PNW_spring	cultivar	AA	AA	AA	AA	AA	BB	AAAAAAAAAABB	1
KW070517	common_wheat	USA	PNW_spring	cultivar	AA	AA	AA	AA	AA	BB	AAAAAAAAAABB	1
LASSIK	common_wheat	USA	PNW_spring	cultivar	AA	AA	AA	AA	AA	BB	AAAAAAAAAABB	1
LEE	common_wheat	USA	PNW_spring	cultivar	AA	AA	AA	AA	AA	BB	AAAAAAAAAABB	1
LEMHI	common_wheat	USA	PNW_spring	cultivar	AA	AA	AA	AA	AA	BB	AAAAAAAAAABB	1
LEONA	common_wheat	USA	PNW_spring	cultivar	AA	AA	AA	AA	AA	BB	AAAAAAAAAABB	1
LOLO	common_wheat	USA	PNW_spring	cultivar	AA	AA	AA	AA	AA	BB	AAAAAAAAAABB	1
LOUISE	common_wheat	USA	PNW_spring	cultivar	AA	AA	AA	AA	AA	BB	AAAAAAAAAABB	1
LPLOUISEMAP	common_wheat	USA	PNW_spring	cultivar	AA	AA	AA	AA	AA	BB	AAAAAAAAAABB	1	1
M5-31-5B	common_wheat	USA	PNW_spring	cultivar	AA	AA	AA	AA	AA	BB	AAAAAAAAAABB	1
MCTH38	common_wheat	USA	PNW_spring	cultivar	AA	AA	AA	AA	AA	BB	AAAAAAAAAABB	1
MCTH43	common_wheat	USA	PNW_spring	cultivar	AA	AA	AA	AA	AA	BB	AAAAAAAAAABB	1
MCTH45	common_wheat	USA	PNW_spring	cultivar	AA	AA	AA	AA	AA	BB	AAAAAAAAAABB	1
MTHW001	common_wheat	USA	PNW_spring	cultivar	AA	AA	AA	AA	AA	BB	AAAAAAAAAABB	1
NEWANA	common_wheat	USA	PNW_spring	cultivar	AA	AA	AA	AA	AA	BB	AAAAAAAAAABB	1
NICK	common_wheat	USA	PNW_spring	cultivar	AA	AA	AA	AA	AA	BB	AAAAAAAAAABB	1
OR4041433	common_wheat	USA	PNW_spring	cultivar	AA	AA	AA	AA	AA	BB	AAAAAAAAAABB	1
OR4042009	common_wheat	USA	PNW_spring	cultivar	AA	AA	AA	AA	AA	BB	AAAAAAAAAABB	1
OR4042011	common_wheat	USA	PNW_spring	cultivar	AA	AA	AA	AA	AA	BB	AAAAAAAAAABB	1
OR4051259	common_wheat	USA	PNW_spring	cultivar	AA	AA	AA	AA	AA	BB	AAAAAAAAAABB	1
OR4061008	common_wheat	USA	PNW_spring	cultivar	AA	AA	AA	AA	AA	BB	AAAAAAAAAABB	1
OR4071017	common_wheat	USA	PNW_spring	cultivar	AA	AA	AA	AA	AA	BB	AAAAAAAAAABB	1
OR4081104	common_wheat	USA	PNW_spring	cultivar	AA	AA	AA	AA	AA	BB	AAAAAAAAAABB	1
OR4081216	common_wheat	USA	PNW_spring	cultivar	AA	AA	AA	AA	AA	BB	AAAAAAAAAABB	1
OR942496	common_wheat	USA	PNW_spring	cultivar	AA	AA	AA	AA	AA	BB	AAAAAAAAAABB	1
OTIS	common_wheat	USA	PNW_spring	cultivar	AA	AA	AA	AA	AA	BB	AAAAAAAAAABB	1
PATWIN	common_wheat	USA	PNW_spring	cultivar	AA	AA	AA	AA	AA	BB	AAAAAAAAAABB	1
POMERELLE	common_wheat	USA	PNW_spring	cultivar	AA	AA	AA	AA	AA	BB	AAAAAAAAAABB	1
S0900036L	common_wheat	USA	PNW_spring	cultivar	AA	AA	AA	AA	AA	BB	AAAAAAAAAABB	1
S0900071	common_wheat	USA	PNW_spring	cultivar	AA	AA	AA	AA	AA	BB	AAAAAAAAAABB	1
S0900155	common_wheat	USA	PNW_spring	cultivar	AA	AA	AA	AA	AA	BB	AAAAAAAAAABB	1
SCARLET	common_wheat	USA	PNW_spring	cultivar	AA	AA	AA	AA	AA	BB	AAAAAAAAAABB	1
SO800258U	common_wheat	USA	PNW_spring	cultivar	AA	AA	AA	AA	AA	BB	AAAAAAAAAABB	1
SONORA	common_wheat	USA	PNW_spring	cultivar	AA	AA	AA	AA	AA	BB	AAAAAAAAAABB	1
SPINTRO89	common_wheat	USA	PNW_spring	cultivar	AA	AA	AA	AA	AA	BB	AAAAAAAAAABB	1
STERLING	common_wheat	USA	PNW_spring	cultivar	AA	AA	AA	AA	AA	BB	AAAAAAAAAABB	1
TREASURE	common_wheat	USA	PNW_spring	cultivar	AA	AA	AA	AA	AA	BB	AAAAAAAAAABB	1
TWIN	common_wheat	USA	PNW_spring	cultivar	AA	AA	AA	AA	AA	BB	AAAAAAAAAABB	1
UC1602	common_wheat	USA	PNW_spring	cultivar	AA	AA	AA	AA	AA	BB	AAAAAAAAAABB	1
UC1603	common_wheat	USA	PNW_spring	cultivar	AA	AA	AA	AA	AA	BB	AAAAAAAAAABB	1
UC1617	common_wheat	USA	PNW_spring	cultivar	AA	AA	AA	AA	AA	BB	AAAAAAAAAABB	1
UI_PETTIT	common_wheat	USA	PNW_spring	cultivar	AA	AA	AA	AA	AA	BB	AAAAAAAAAABB	1
WA008041	common_wheat	USA	PNW_spring	cultivar	AA	AA	AA	AA	AA	BB	AAAAAAAAAABB	1
WA008058	common_wheat	USA	PNW_spring	cultivar	AA	AA	AA	AA	AA	BB	AAAAAAAAAABB	1
WA008059	common_wheat	USA	PNW_spring	cultivar	AA	AA	AA	AA	AA	BB	AAAAAAAAAABB	1
WA008100	common_wheat	USA	PNW_spring	cultivar	AA	AA	AA	AA	AA	BB	AAAAAAAAAABB	1
WA008104	common_wheat	USA	PNW_spring	cultivar	AA	AA	AA	AA	AA	BB	AAAAAAAAAABB	1
WA008105	common_wheat	USA	PNW_spring	cultivar	AA	AA	AA	AA	AA	BB	AAAAAAAAAABB	1
WA008106	common_wheat	USA	PNW_spring	cultivar	AA	AA	AA	AA	AA	BB	AAAAAAAAAABB	1
WA008107	common_wheat	USA	PNW_spring	cultivar	AA	AA	AA	AA	AA	BB	AAAAAAAAAABB	1
WA008108	common_wheat	USA	PNW_spring	cultivar	AA	AA	AA	AA	AA	BB	AAAAAAAAAABB	1
WA008109	common_wheat	USA	PNW_spring	cultivar	AA	AA	AA	AA	AA	BB	AAAAAAAAAABB	1
WA008112	common_wheat	USA	PNW_spring	cultivar	AA	AA	AA	AA	AA	BB	AAAAAAAAAABB	1	1
WA008119	common_wheat	USA	PNW_spring	cultivar	AA	AA	AA	AA	AA	BB	AAAAAAAAAABB	1
WA008122	common_wheat	USA	PNW_spring	cultivar	AA	AA	AA	AA	AA	BB	AAAAAAAAAABB	1
WA008123	common_wheat	USA	PNW_spring	cultivar	AA	AA	AA	AA	AA	BB	AAAAAAAAAABB	1
WA008124	common_wheat	USA	PNW_spring	cultivar	AA	AA	AA	AA	AA	BB	AAAAAAAAAABB	1
WA008125	common_wheat	USA	PNW_spring	cultivar	AA	AA	AA	AA	AA	BB	AAAAAAAAAABB	1
WA008128	common_wheat	USA	PNW_spring	cultivar	AA	AA	AA	AA	AA	BB	AAAAAAAAAABB	1
WA008129	common_wheat	USA	PNW_spring	cultivar	AA	AA	AA	AA	AA	BB	AAAAAAAAAABB	1
WA008131	common_wheat	USA	PNW_spring	cultivar	AA	AA	AA	AA	AA	BB	AAAAAAAAAABB	1
WA008132	common_wheat	USA	PNW_spring	cultivar	AA	AA	AA	AA	AA	BB	AAAAAAAAAABB	1
WA008133	common_wheat	USA	PNW_spring	cultivar	AA	AA	AA	AA	AA	BB	AAAAAAAAAABB	1
WA8047	common_wheat	USA	PNW_spring	cultivar	AA	AA	AA	AA	AA	BB	AAAAAAAAAABB	1
WAKANZ	common_wheat	USA	PNW_spring	cultivar	AA	AA	AA	AA	AA	BB	AAAAAAAAAABB	1
WAWAWAI	common_wheat	USA	PNW_spring	cultivar	AA	AA	AA	AA	AA	BB	AAAAAAAAAABB	1
WB-FUZION	common_wheat	USA	PNW_spring	cultivar	AA	AA	AA	AA	AA	BB	AAAAAAAAAABB	1
WHITEBIRD	common_wheat	USA	PNW_spring	cultivar	AA	AA	AA	AA	AA	BB	AAAAAAAAAABB	1	1
WINSOME	common_wheat	USA	PNW_spring	cultivar	AA	AA	AA	AA	AA	BB	AAAAAAAAAABB	1
YUMA34B.BEECHER	common_wheat	USA	PNW_spring	cultivar	AA	AA	AA	AA	AA	BB	AAAAAAAAAABB	1
2BPP001	common_wheat	USA	PNW_winter	cultivar	AA	AA	AA	AA	AA	BB	AAAAAAAAAABB	1
5J030662-13	common_wheat	USA	PNW_winter	cultivar	AA	AA	AA	AA	AA	BB	AAAAAAAAAABB	1
5J030662-4	common_wheat	USA	PNW_winter	cultivar	AA	AA	AA	AA	AA	BB	AAAAAAAAAABB	1
5J040039-1	common_wheat	USA	PNW_winter	cultivar	AA	AA	AA	AA	AA	BB	AAAAAAAAAABB	1
5J040612	common_wheat	USA	PNW_winter	cultivar	AA	AA	AA	AA	AA	BB	AAAAAAAAAABB	1
5J040746	common_wheat	USA	PNW_winter	cultivar	AA	AA	AA	AA	AA	BB	AAAAAAAAAABB	1
6J030184-2	common_wheat	USA	PNW_winter	cultivar	AA	AA	AA	AA	AA	BB	AAAAAAAAAABB	1
8BPCF105	common_wheat	USA	PNW_winter	cultivar	AA	AA	AA	AA	AA	BB	AAAAAAAAAABB	1
8BPL1005	common_wheat	USA	PNW_winter	cultivar	AA	AA	AA	AA	AA	BB	AAAAAAAAAABB	1
8BPL101	common_wheat	USA	PNW_winter	cultivar	AA	AA	AA	AA	AA	BB	AAAAAAAAAABB	1	1
8BPL102	common_wheat	USA	PNW_winter	cultivar	AA	AA	AA	AA	AA	BB	AAAAAAAAAABB	1
8BPP104	common_wheat	USA	PNW_winter	cultivar	AA	AA	AA	AA	AA	BB	AAAAAAAAAABB	1
8BPP105	common_wheat	USA	PNW_winter	cultivar	AA	AA	AA	AA	AA	BB	AAAAAAAAAABB	1
92-16004A	common_wheat	USA	PNW_winter	cultivar	AA	AA	AA	AA	AA	BB	AAAAAAAAAABB	1
98X371-3C	common_wheat	USA	PNW_winter	cultivar	AA	AA	AA	AA	AA	BB	AAAAAAAAAABB	1
98X471-2C	common_wheat	USA	PNW_winter	cultivar	AA	AA	AA	AA	AA	BB	AAAAAAAAAABB	1
98X525-3C	common_wheat	USA	PNW_winter	cultivar	AA	AA	AA	AA	AA	BB	AAAAAAAAAABB	1
98X551-1C	common_wheat	USA	PNW_winter	cultivar	AA	AA	AA	AA	AA	BB	AAAAAAAAAABB	1
99X13-3C	common_wheat	USA	PNW_winter	cultivar	AA	AA	AA	AA	AA	BB	AAAAAAAAAABB	1
99X15-1C	common_wheat	USA	PNW_winter	cultivar	AA	AA	AA	AA	AA	BB	AAAAAAAAAABB	1
99X60-2C	common_wheat	USA	PNW_winter	cultivar	AA	AA	AA	AA	AA	BB	AAAAAAAAAABB	1
ALBION	common_wheat	USA	PNW_winter	cultivar	AA	AA	AA	AA	AA	BB	AAAAAAAAAABB	1
ANTON	common_wheat	USA	PNW_winter	cultivar	AA	AA	AA	AA	AA	BB	AAAAAAAAAABB	1
ARS960277L	common_wheat	USA	PNW_winter	cultivar	AA	AA	AA	AA	AA	BB	AAAAAAAAAABB	1
ARS970042-1C	common_wheat	USA	PNW_winter	cultivar	AA	AA	AA	AA	AA	BB	AAAAAAAAAABB	1	1
ARS970071-3C	common_wheat	USA	PNW_winter	cultivar	AA	AA	AA	AA	AA	BB	AAAAAAAAAABB	1
ARS970075-3C	common_wheat	USA	PNW_winter	cultivar	AA	AA	AA	AA	AA	BB	AAAAAAAAAABB	1
ARS970163-4C	common_wheat	USA	PNW_winter	cultivar	AA	AA	AA	AA	AA	BB	AAAAAAAAAABB	1
ARS970170-2L	common_wheat	USA	PNW_winter	cultivar	AA	AA	AA	AA	AA	BB	AAAAAAAAAABB	1
ARS970184-1C	common_wheat	USA	PNW_winter	cultivar	AA	AA	AA	AA	AA	BB	AAAAAAAAAABB	1
ARS97230-6C	common_wheat	USA	PNW_winter	cultivar	AA	AA	AA	AA	AA	BB	AAAAAAAAAABB	1
ARS980495-2L	common_wheat	USA	PNW_winter	cultivar	AA	AA	AA	AA	AA	BB	AAAAAAAAAABB	1
ARS98356-2C	common_wheat	USA	PNW_winter	cultivar	AA	AA	AA	AA	AA	BB	AAAAAAAAAABB	1
BUCHANAN	common_wheat	USA	PNW_winter	cultivar	AA	AA	AA	AA	AA	BB	AAAAAAAAAABB	1
CHINESE166	common_wheat	USA	PNW_winter	cultivar	AA	AA	AA	AA	AA	BB	AAAAAAAAAABB	1
CO03064-2	common_wheat	USA	PNW_winter	cultivar	AA	AA	AA	AA	AA	BB	AAAAAAAAAABB	1
DAWS	common_wheat	USA	PNW_winter	cultivar	AA	AA	AA	AA	AA	BB	AAAAAAAAAABB	1
EDWIN	common_wheat	USA	PNW_winter	cultivar	AA	AA	AA	AA	AA	BB	AAAAAAAAAABB	1
ELGINSJ	common_wheat	USA	PNW_winter	cultivar	AA	AA	AA	AA	AA	BB	AAAAAAAAAABB	1
FIDEL	common_wheat	USA	PNW_winter	cultivar	AA	AA	AA	AA	AA	BB	AAAAAAAAAABB	1
FOOTE	common_wheat	USA	PNW_winter	cultivar	AA	AA	AA	AA	AA	BB	AAAAAAAAAABB	1
HILLER	common_wheat	USA	PNW_winter	cultivar	AA	AA	AA	AA	AA	BB	AAAAAAAAAABB	1
HS00146	common_wheat	USA	PNW_winter	cultivar	AA	AA	AA	AA	AA	BB	AAAAAAAAAABB	1
HS00162-17L-5	common_wheat	USA	PNW_winter	cultivar	AA	AA	AA	AA	AA	BB	AAAAAAAAAABB	1
HS00162-1L-5	common_wheat	USA	PNW_winter	cultivar	AA	AA	AA	AA	AA	BB	AAAAAAAAAABB	1
HS00162-20L-4	common_wheat	USA	PNW_winter	cultivar	AA	AA	AA	AA	AA	BB	AAAAAAAAAABB	1
HS00162-21L-6	common_wheat	USA	PNW_winter	cultivar	AA	AA	AA	AA	AA	BB	AAAAAAAAAABB	1
HS00162-23L-4	common_wheat	USA	PNW_winter	cultivar	AA	AA	AA	AA	AA	BB	AAAAAAAAAABB	1
HS00163-4L-1	common_wheat	USA	PNW_winter	cultivar	AA	AA	AA	AA	AA	BB	AAAAAAAAAABB	1
HS00165	common_wheat	USA	PNW_winter	cultivar	AA	AA	AA	AA	AA	BB	AAAAAAAAAABB	1	1
HS00166	common_wheat	USA	PNW_winter	cultivar	AA	AA	AA	AA	AA	BB	AAAAAAAAAABB	1
HS00167	common_wheat	USA	PNW_winter	cultivar	AA	AA	AA	AA	AA	BB	AAAAAAAAAABB	1
HS00168	common_wheat	USA	PNW_winter	cultivar	AA	AA	AA	AA	AA	BB	AAAAAAAAAABB	1
HS00169	common_wheat	USA	PNW_winter	cultivar	AA	AA	AA	AA	AA	BB	AAAAAAAAAABB	1
HS00170	common_wheat	USA	PNW_winter	cultivar	AA	AA	AA	AA	AA	BB	AAAAAAAAAABB	1
HS00173	common_wheat	USA	PNW_winter	cultivar	AA	AA	AA	AA	AA	BB	AAAAAAAAAABB	1
HS00176	common_wheat	USA	PNW_winter	cultivar	AA	AA	AA	AA	AA	BB	AAAAAAAAAABB	1
HS00179	common_wheat	USA	PNW_winter	cultivar	AA	AA	AA	AA	AA	BB	AAAAAAAAAABB	1
HS98175-3L-2	common_wheat	USA	PNW_winter	cultivar	AA	AA	AA	AA	AA	BB	AAAAAAAAAABB	1
HYAK	common_wheat	USA	PNW_winter	cultivar	AA	AA	AA	AA	AA	BB	AAAAAAAAAABB	1
HYBRID63	common_wheat	USA	PNW_winter	cultivar	AA	AA	AA	AA	AA	BB	AAAAAAAAAABB	1
HYSLOP	common_wheat	USA	PNW_winter	cultivar	AA	AA	AA	AA	AA	BB	AAAAAAAAAABB	1
ID01-11604A	common_wheat	USA	PNW_winter	cultivar	AA	AA	AA	AA	AA	BB	AAAAAAAAAABB	1
ID01-11803A	common_wheat	USA	PNW_winter	cultivar	AA	AA	AA	AA	AA	BB	AAAAAAAAAABB	1
ID01-19904A	common_wheat	USA	PNW_winter	cultivar	AA	AA	AA	AA	AA	BB	AAAAAAAAAABB	1
ID01-30105A	common_wheat	USA	PNW_winter	cultivar	AA	AA	AA	AA	AA	BB	AAAAAAAAAABB	1
ID01-49201B	common_wheat	USA	PNW_winter	cultivar	AA	AA	AA	AA	AA	BB	AAAAAAAAAABB	1
ID0576	common_wheat	USA	PNW_winter	cultivar	AA	AA	AA	AA	AA	BB	AAAAAAAAAABB	1
ID0591	common_wheat	USA	PNW_winter	cultivar	AA	AA	AA	AA	AA	BB	AAAAAAAAAABB	1
ID0681	common_wheat	USA	PNW_winter	cultivar	AA	AA	AA	AA	AA	BB	AAAAAAAAAABB	1
ID0685	common_wheat	USA	PNW_winter	cultivar	AA	AA	AA	AA	AA	BB	AAAAAAAAAABB	1
ID98-15306A	common_wheat	USA	PNW_winter	cultivar	AA	AA	AA	AA	AA	BB	AAAAAAAAAABB	1
ID98-19010A	common_wheat	USA	PNW_winter	cultivar	AA	AA	AA	AA	AA	BB	AAAAAAAAAABB	1
ID98-19502A	common_wheat	USA	PNW_winter	cultivar	AA	AA	AA	AA	AA	BB	AAAAAAAAAABB	1
ID99-22501A	common_wheat	USA	PNW_winter	cultivar	AA	AA	AA	AA	AA	BB	AAAAAAAAAABB	1
J98C0004(A)+	common_wheat	USA	PNW_winter	cultivar	AA	AA	AA	AA	AA	BB	AAAAAAAAAABB	1
J98C0005(A)+	common_wheat	USA	PNW_winter	cultivar	AA	AA	AA	AA	AA	BB	AAAAAAAAAABB	1
LEWJAIN	common_wheat	USA	PNW_winter	cultivar	AA	AA	AA	AA	AA	BB	AAAAAAAAAABB	1
LEWJAINSJ	common_wheat	USA	PNW_winter	cultivar	AA	AA	AA	AA	AA	BB	AAAAAAAAAABB	1
LOUISECAP	common_wheat	USA	PNW_winter	cultivar	AA	AA	AA	AA	AA	BB	AAAAAAAAAABB	1
LP091	common_wheat	USA	PNW_winter	cultivar	AA	AA	AA	AA	AA	BB	AAAAAAAAAABB	1	1
MANNING	common_wheat	USA	PNW_winter	cultivar	AA	AA	AA	AA	AA	BB	AAAAAAAAAABB	1
MORO	common_wheat	USA	PNW_winter	cultivar	AA	AA	AA	AA	AA	BB	AAAAAAAAAABB	1
MUNSTERTALER	common_wheat	USA	PNW_winter	cultivar	AA	AA	AA	AA	AA	BB	AAAAAAAAAABB	1
N96L1226	common_wheat	USA	PNW_winter	cultivar	AA	AA	AA	AA	AA	BB	AAAAAAAAAABB	1
N96L189	common_wheat	USA	PNW_winter	cultivar	AA	AA	AA	AA	AA	BB	AAAAAAAAAABB	1
NW97S277	common_wheat	USA	PNW_winter	cultivar	AA	AA	AA	AA	AA	BB	AAAAAAAAAABB	1
OR2040075H	common_wheat	USA	PNW_winter	cultivar	AA	AA	AA	AA	AA	BB	AAAAAAAAAABB	1
OR2052046H	common_wheat	USA	PNW_winter	cultivar	AA	AA	AA	AA	AA	BB	AAAAAAAAAABB	1
OR2060541	common_wheat	USA	PNW_winter	cultivar	AA	AA	AA	AA	AA	BB	AAAAAAAAAABB	1
OR2070349	common_wheat	USA	PNW_winter	cultivar	AA	AA	AA	AA	AA	BB	AAAAAAAAAABB	1
OR2070831	common_wheat	USA	PNW_winter	cultivar	AA	AA	AA	AA	AA	BB	AAAAAAAAAABB	1
OR2071543	common_wheat	USA	PNW_winter	cultivar	AA	AA	AA	AA	AA	BB	AAAAAAAAAABB	1
OR2071695	common_wheat	USA	PNW_winter	cultivar	AA	AA	AA	AA	AA	BB	AAAAAAAAAABB	1
OR8505138	common_wheat	USA	PNW_winter	cultivar	AA	AA	AA	AA	AA	BB	AAAAAAAAAABB	1
OR9900548	common_wheat	USA	PNW_winter	cultivar	AA	AA	AA	AA	AA	BB	AAAAAAAAAABB	1
PAHA	common_wheat	USA	PNW_winter	cultivar	AA	AA	AA	AA	AA	BB	AAAAAAAAAABB	1
PS279	common_wheat	USA	PNW_winter	cultivar	AA	AA	AA	AA	AA	BB	AAAAAAAAAABB	1
RED_BOBS	common_wheat	USA	PNW_winter	cultivar	AA	AA	AA	AA	AA	BB	AAAAAAAAAABB	1
RHODE	common_wheat	USA	PNW_winter	cultivar	AA	AA	AA	AA	AA	BB	AAAAAAAAAABB	1
RJAMES	common_wheat	USA	PNW_winter	cultivar	AA	AA	AA	AA	AA	BB	AAAAAAAAAABB	1
SNP-AB076	common_wheat	USA	PNW_winter	cultivar	AA	AA	AA	AA	AA	BB	AAAAAAAAAABB	1
TRES	common_wheat	USA	PNW_winter	cultivar	AA	AA	AA	AA	AA	BB	AAAAAAAAAABB	1
TUBBS	common_wheat	USA	PNW_winter	cultivar	AA	AA	AA	AA	AA	BB	AAAAAAAAAABB	1	1
TYEE	common_wheat	USA	PNW_winter	cultivar	AA	AA	AA	AA	AA	BB	AAAAAAAAAABB	1
UIGRACE	common_wheat	USA	PNW_winter	cultivar	AA	AA	AA	AA	AA	BB	AAAAAAAAAABB	1
UISILVER	common_wheat	USA	PNW_winter	cultivar	AA	AA	AA	AA	AA	BB	AAAAAAAAAABB	1
UI_DARWIN	common_wheat	USA	PNW_winter	cultivar	AA	AA	AA	AA	AA	BB	AAAAAAAAAABB	1
UT9325-55	common_wheat	USA	PNW_winter	cultivar	AA	AA	AA	AA	AA	BB	AAAAAAAAAABB	1
UTAH100	common_wheat	USA	PNW_winter	cultivar	AA	AA	AA	AA	AA	BB	AAAAAAAAAABB	1
VOLT	common_wheat	USA	PNW_winter	cultivar	AA	AA	AA	AA	AA	BB	AAAAAAAAAABB	1
WA007970	common_wheat	USA	PNW_winter	cultivar	AA	AA	AA	AA	AA	BB	AAAAAAAAAABB	1
WA008022	common_wheat	USA	PNW_winter	cultivar	AA	AA	AA	AA	AA	BB	AAAAAAAAAABB	1
WA008063	common_wheat	USA	PNW_winter	cultivar	AA	AA	AA	AA	AA	BB	AAAAAAAAAABB	1
WA008065	common_wheat	USA	PNW_winter	cultivar	AA	AA	AA	AA	AA	BB	AAAAAAAAAABB	1
WA008068	common_wheat	USA	PNW_winter	cultivar	AA	AA	AA	AA	AA	BB	AAAAAAAAAABB	1
WA008070	common_wheat	USA	PNW_winter	cultivar	AA	AA	AA	AA	AA	BB	AAAAAAAAAABB	1
WA008095	common_wheat	USA	PNW_winter	cultivar	AA	AA	AA	AA	AA	BB	AAAAAAAAAABB	1
WA008096	common_wheat	USA	PNW_winter	cultivar	AA	AA	AA	AA	AA	BB	AAAAAAAAAABB	1	1
WA008097	common_wheat	USA	PNW_winter	cultivar	AA	AA	AA	AA	AA	BB	AAAAAAAAAABB	1
WA008120	common_wheat	USA	PNW_winter	cultivar	AA	AA	AA	AA	AA	BB	AAAAAAAAAABB	1
WA008130	common_wheat	USA	PNW_winter	cultivar	AA	AA	AA	AA	AA	BB	AAAAAAAAAABB	1
WA7917SJ	common_wheat	USA	PNW_winter	cultivar	AA	AA	AA	AA	AA	BB	AAAAAAAAAABB	1
WA7965SJ	common_wheat	USA	PNW_winter	cultivar	AA	AA	AA	AA	AA	BB	AAAAAAAAAABB	1
WALLADAY	common_wheat	USA	PNW_winter	cultivar	AA	AA	AA	AA	AA	BB	AAAAAAAAAABB	1
WEATHERFORD	common_wheat	USA	PNW_winter	cultivar	AA	AA	AA	AA	AA	BB	AAAAAAAAAABB	1
X00262-1C	common_wheat	USA	PNW_winter	cultivar	AA	AA	AA	AA	AA	BB	AAAAAAAAAABB	1
X010744-3C	common_wheat	USA	PNW_winter	cultivar	AA	AA	AA	AA	AA	BB	AAAAAAAAAABB	1
X010749-1C	common_wheat	USA	PNW_winter	cultivar	AA	AA	AA	AA	AA	BB	AAAAAAAAAABB	1
X010779-3C	common_wheat	USA	PNW_winter	cultivar	AA	AA	AA	AA	AA	BB	AAAAAAAAAABB	1
X010809-1C	common_wheat	USA	PNW_winter	cultivar	AA	AA	AA	AA	AA	BB	AAAAAAAAAABB	1
X990072-2C	common_wheat	USA	PNW_winter	cultivar	AA	AA	AA	AA	AA	BB	AAAAAAAAAABB	1
LIVINGSTON	common_wheat	Australia	Australia_SE_spring	cultivar	AA	AA	AA	AA	BB	AA	AAAAAAAABBAA	2	1
MERINDA	common_wheat	Australia	Australia_SE_spring	cultivar	AA	AA	AA	AA	BB	AA	AAAAAAAABBAA	2	1
CLEOPATRA	common_wheat	Australia	Australia_W_spring	cultivar	AA	AA	AA	AA	BB	AA	AAAAAAAABBAA	2	1
MO3/3-23	common_wheat	USA	CENTRAL_NORTH_spring	cultivar	AA	AA	AA	AA	BB	AA	AAAAAAAABBAA	2	1
ND03/1-13	common_wheat	USA	CENTRAL_NORTH_spring	cultivar	AA	AA	AA	AA	BB	AA	AAAAAAAABBAA	2	1
ND04/3-18	common_wheat	USA	CENTRAL_NORTH_spring	cultivar	AA	AA	AA	AA	BB	AA	AAAAAAAABBAA	2	1
ND04/3-19	common_wheat	USA	CENTRAL_NORTH_spring	cultivar	AA	AA	AA	AA	BB	AA	AAAAAAAABBAA	2	1
ND751	common_wheat	USA	CENTRAL_NORTH_spring	cultivar	AA	AA	AA	AA	BB	AA	AAAAAAAABBAA	2	1
SD4112	common_wheat	USA	CENTRAL_NORTH_spring	cultivar	AA	AA	AA	AA	BB	AA	AAAAAAAABBAA	2	1
AUGUSTA	common_wheat	USA	EAST_winter	cultivar	AA	AA	AA	AA	BB	AA	AAAAAAAABBAA	2	1
CHELSEA	common_wheat	USA	EAST_winter	cultivar	AA	AA	AA	AA	BB	AA	AAAAAAAABBAA	2	1
CLARK	common_wheat	USA	EAST_winter	cultivar	AA	AA	AA	AA	BB	AA	AAAAAAAABBAA	2	1
CORNELL595	common_wheat	USA	EAST_winter	cultivar	AA	AA	AA	AA	BB	AA	AAAAAAAABBAA	2	1
DAISY	common_wheat	USA	EAST_winter	cultivar	AA	AA	AA	AA	BB	AA	AAAAAAAABBAA	2	1
DELAWARE	common_wheat	USA	EAST_winter	cultivar	AA	AA	AA	AA	BB	AA	AAAAAAAABBAA	2	1
FRANKENMUTH	common_wheat	USA	EAST_winter	cultivar	AA	AA	AA	AA	BB	AA	AAAAAAAABBAA	2	1
GA991209-6E33	common_wheat	USA	EAST_winter	cultivar	AA	AA	AA	AA	BB	AA	AAAAAAAABBAA	2	1
GENESEEGIANT	common_wheat	USA	EAST_winter	cultivar	AA	AA	AA	AA	BB	AA	AAAAAAAABBAA	2	1
GOLDFIELD	common_wheat	USA	EAST_winter	cultivar	AA	AA	AA	AA	BB	AA	AAAAAAAABBAA	2	1
GRANDPRIZE	common_wheat	USA	EAST_winter	cultivar	AA	AA	AA	AA	BB	AA	AAAAAAAABBAA	2	1
HONOR	common_wheat	USA	EAST_winter	cultivar	AA	AA	AA	AA	BB	AA	AAAAAAAABBAA	2	1
HOUSER	common_wheat	USA	EAST_winter	cultivar	AA	AA	AA	AA	BB	AA	AAAAAAAABBAA	2	1
IL07-4415	common_wheat	USA	EAST_winter	cultivar	AA	AA	AA	AA	BB	AA	AAAAAAAABBAA	2	1
IL96-6472	common_wheat	USA	EAST_winter	cultivar	AA	AA	AA	AA	BB	AA	AAAAAAAABBAA	2	1
[truncated: 567 more rows]
